# Supplementary material for: Oxidative cross-coupling of pyridine N-oxides and ethers between C(sp2)–H/C(sp3)–H bonds under transition-metal-free conditions
Source: Royal Society of Chemistry journal article supplement (doi:10.1039/c5ob00237k), 2015-01-01

Supplementary Material (ESI) for Organic & Biomolecular Chemistry

This journal is (c) The Royal Society of Chemistry 2015

## Supporting Information

### Oxidative Cross-Coupling of Pyridine *N*-Oxide and Ether between C(sp<sup>2</sup>)-H/C(sp<sup>3</sup>)-H Bonds under Transition-Metal-Free Conditions

Wei Sun,<sup>a</sup> Zuguang Xie,<sup>a</sup> Jie Liu,<sup>\*a</sup> and Lei Wang<sup>\*a,b</sup>

<sup>a</sup> Department of Chemistry, Huaibei Normal University, Huaibei, Anhui 235000, P R China, Tel: +86-561-3802-069 Fax: +86-561-3090-518 E-mail: leiwang@chnu.edu.cn

<sup>b</sup> State Key Laboratory of Organometallic Chemistry, Shanghai Institute of Organic Chemistry, Chinese Academy of Sciences, Shanghai 200032, P R China

#### *Table of Contents for Supporting Information*

|                                                                        |    |
|------------------------------------------------------------------------|----|
| 1. General considerations.....                                         | 1  |
| 2. General procedure.....                                              | 1  |
| 2.1. Cross-coupling of nitrogen heterocycles with tetrahydrofuran..... | 1  |
| 2.2. General procedure for the deoxidizative reaction.....             | 2  |
| 3. Characterization data for the products.....                         | 3  |
| 4. <sup>1</sup> H and <sup>13</sup> C NMR spectra of the products..... | 13 |

## 1. General considerations

All  $^1\text{H}$  NMR and  $^{13}\text{C}$  NMR spectra were recorded on a 400 MHz Bruker FT-NMR spectrometers (400 MHz or 100 MHz, respectively). All chemical shifts are given as  $\delta$  value (ppm) with reference to tetramethylsilane (TMS) as an internal standard. The peak patterns are indicated as follows: s, singlet; d, doublet; t, triplet; m, multiplet; q, quartet. The coupling constants,  $J$ , are reported in Hertz (Hz). High resolution mass spectroscopy data of the product were collected on a Waters Micromass GCT instrument. High resolution mass spectroscopy data of the product were collected on an Agilent Technologies 6540 UHD Accurate-Mass Q-TOF LC/MS (ESI).

The chemicals and solvents were purchased from commercial suppliers either from Aldrich (USA) or Shanghai Chemical Company (China) without further purification. All the solvents were dried and freshly distilled prior to use. All the reactions were carried out under air atmosphere. Products were purified by flash chromatography on 100–200 mesh silica gels,  $\text{SiO}_2$ .

## 2. General procedure

### 2.1. Typical procedure for the cross-coupling of pyridine *N*-oxide with tetrahydrofuran

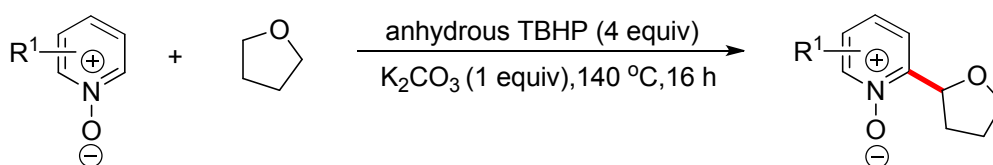

All operations are carried out in a glove box under nitrogen atmosphere. To a 25 mL Schlenk tube were added pyridine 1-oxide (0.50 mmol), anhydrous *tert*-butyl hydroperoxide (TBHP, 2.0 mmol, 4.0 equiv) and  $\text{K}_2\text{CO}_3$  (0.50 mmol, 1.0 equiv). Then tetrahydrofuran (THF, 1.0 mL) was injected into bottom of the tube using a long needle syringe. The mixture was stirred at the preheated oil bath under  $140\text{ }^\circ\text{C}$  for 16 h. When the reaction was cooled down to room temperature, the mixture was filtered through a short plug of silica gel and washed with ethyl ether ( $3\times 6.0\text{ mL}$ ) and saturated NaCl solution ( $3\times 6.0\text{ mL}$ ). The

combined organic phase was dried over  $\text{MgSO}_4$  and then concentrated under vacuum. The product was purified through flash column chromatography on 200–300 mesh silica gel with petroleum ether/ethyl acetate as eluent with a suitable ratio according to the TLC analysis.

## 2.2. General procedure for the deoxidative reaction

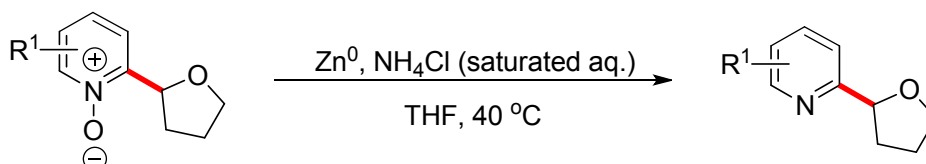

According to the procedure reported in the literature (Y. Aoyagi, T. Abe and A. Ohta, *Synthesis*, 1997, 891), a 20 mL vial was charged with 2-substituted *N*-oxide (0.30 mmol, 1.0 equiv), THF (1.0 mL) and saturated  $\text{NH}_4\text{Cl}$  aqueous solution (1.0 mL). The mixture was stirred under an air atmosphere at 40 °C. Then  $\text{Zn}^0$  powder (0.90 mmol, 3.0 equiv) in 4 portions of 0.75 eq. each in 20 minutes interval was added. When the reaction was complete by TLC analysis, the mixture was filtered to remove unreacted  $\text{Zn}^0$  and filter cake was washed with THF. The mixture was diluted with EtOAc and organic layer was separated. The organic phase was washed with  $\text{H}_2\text{O}$  (2×5.0 mL), dried with  $\text{MgSO}_4$ , filtered and concentrated in vacuo. The residue is then purified via silica gel chromatography using petroleum ether/ethyl acetate mixtures.

### 3. Characterization data for the products

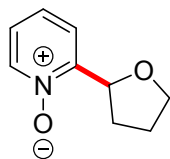

#### 2-(Tetrahydrofuran-2-yl)pyridine 1-oxide

**3a:** Colourless liquid.  $^1\text{H}$  NMR (400 MHz,  $\text{CDCl}_3$ )  $\delta$ : 8.22 (d,  $J = 6.32$  Hz, 1H), 7.53 (d,  $J = 7.68$  Hz, 1H), 7.32–7.28 (m, 1H), 7.21–7.17 (m, 1H), 5.36 (t,  $J = 6.42$  Hz, 1H), 4.13–4.08 (m, 1H), 4.00–3.94 (m, 1H), 2.75–2.66 (m, 1H), 2.07–1.99 (m, 1H), 1.92–1.81 (m, 2H);  $^{13}\text{C}$  NMR (100 Mz,  $\text{CDCl}_3$ )  $\delta$ : 139.4, 126.2, 123.8, 122.5, 75.3, 69.1, 30.9, 25.6. HRMS (ESI) ( $[\text{M}+\text{H}]^+$ ) Calcd. For  $\text{C}_9\text{H}_{12}\text{NO}_2$ : 166.0868, Found: 166.0868.

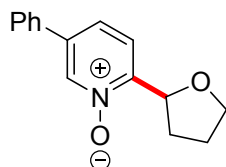

#### 5-Phenyl-2-(tetrahydrofuran-2-yl)pyridine 1-oxide

**3b:** Yellow liquid.  $^1\text{H}$  NMR (400 MHz,  $\text{CDCl}_3$ )  $\delta$ : 8.49 (s, 1H), 7.58–7.56 (m, 1H), 7.54–7.51 (m, 3H), 7.49–7.41 (m, 4H), 5.40 (t,  $J = 6.04$  Hz, 1H), 4.14–4.11 (m, 1H), 4.01–3.96 (m, 1H), 2.76–2.70 (m, 1H), 2.04 (br, 1H), 1.90 (br, 2H);  $^{13}\text{C}$  NMR (100 Mz,  $\text{CDCl}_3$ )  $\delta$ : 152.2, 138.1, 137.6, 135.3, 129.2, 129.0, 126.8, 125.0, 122.4, 75.3, 69.1, 31.0, 25.6. HRMS (ESI) ( $[\text{M}+\text{H}]^+$ ) Calcd. For  $\text{C}_{15}\text{H}_{15}\text{NO}_2$ : 242.1181, Found: 242.1179. HRMS (ESI) ( $[\text{M}+\text{H}]^+$ ) Calcd. For  $\text{C}_{15}\text{H}_{16}\text{NO}_2$ : 242.1181, Found: 242.1179.

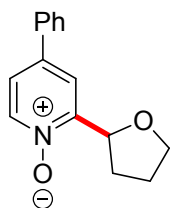

#### 4-Phenyl-2-(tetrahydrofuran-2-yl)pyridine 1-oxide

**3c:** Yellow liquid.  $^1\text{H}$  NMR (400 MHz,  $\text{CDCl}_3$ )  $\delta$ : 8.24 (d,  $J = 6.72$  Hz, 1H), 7.75 (s, 1H), 7.62 (d,  $J = 7.60$  Hz, 2H), 7.49–7.46 (m, 2H), 7.43–7.40 (m, 2H), 5.39 (t,  $J = 6.44$  Hz, 1H), 4.18–4.12 (m, 1H), 4.02–3.97 (m, 1H), 2.80–2.72 (m, 1H), 2.09–2.01 (m, 1H), 1.96–1.85 (m, 2H);  $^{13}\text{C}$  NMR (100 Mz,  $\text{CDCl}_3$ )  $\delta$ : 153.7, 139.4, 138.7, 136.8, 129.2, 128.9, 126.5, 121.5, 120.0, 75.4, 69.1, 31.0, 25.6. HRMS (ESI) ( $[\text{M}+\text{H}]^+$ ) Calcd. For  $\text{C}_{15}\text{H}_{16}\text{NO}_2$ : 242.1181, Found: 242.1176.

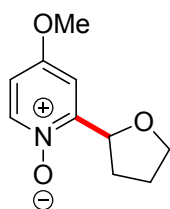

#### 4-Methoxy-2-(tetrahydrofuran-2-yl)pyridine 1-oxide

**3d:** Colourless liquid.  $^1\text{H}$  NMR (400 MHz,  $\text{CDCl}_3$ )  $\delta$ : 8.08 (d,  $J = 6.84$  Hz, 1H), 7.03 (s, 1H), 6.70–6.69 (m, 1H), 5.31 (br, 1H), 4.09–4.08 (m, 1H), 3.95–3.94 (m, 1H), 3.84 (s, 3H), 2.72–2.71 (m, 1H), 2.00 (br, 1H), 1.85 (br, 2H);  $^{13}\text{C}$  NMR (100 Mz,  $\text{CDCl}_3$ )  $\delta$ : 158.1, 154.8, 140.2, 110.4, 107.2, 75.4, 69.1, 55.9, 31.0, 25.5. HRMS (ESI) ( $[\text{M}+\text{H}]^+$ ) Calcd. For  $\text{C}_{10}\text{H}_{14}\text{NO}_3$ : 196.0974, Found: 196.0971.

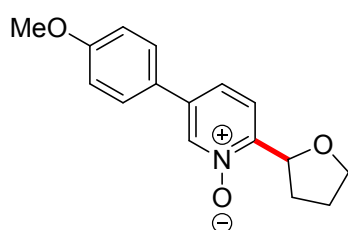

#### 5-(4-Methoxyphenyl)-2-(tetrahydrofuran-2-yl)pyridine 1-oxide

**3e:** White solid.  $^1\text{H}$  NMR (400 MHz,  $\text{CDCl}_3$ )  $\delta$ : 8.41 (s, 1H), 7.52 (d,  $J = 8.24$  Hz, 1H), 7.47–7.41 (m, 3H), 6.98 (d,  $J = 8.56$  Hz, 2H), 5.39 (t,  $J = 5.82$  Hz, 1H), 4.15–4.10 (m, 1H), 4.00–3.94 (m, 1H), 3.84 (s, 3H), 2.73–2.68 (m, 1H), 2.06–1.99 (m, 1H), 1.92–1.83 (m, 2H);  $^{13}\text{C}$  NMR (100 Mz,  $\text{CDCl}_3$ )  $\delta$ : 160.3, 137.6, 137.1, 127.9, 127.6, 124.3, 122.2, 114.6, 75.2, 69.1, 55.3, 31.0, 25.5. HRMS (ESI) ( $[\text{M}+\text{H}]^+$ ) Calcd. For  $\text{C}_{16}\text{H}_{18}\text{NO}_3$ : 272.1287, Found: 272.1285.

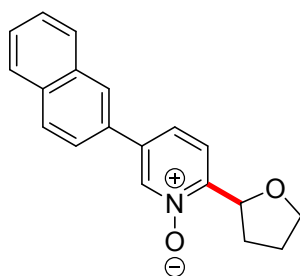

#### 5-(Naphthalen-2-yl)-2-(tetrahydrofuran-2-yl)pyridine 1-oxide

**3f:** Colourless solid.  $^1\text{H}$  NMR (400 MHz,  $\text{CDCl}_3$ )  $\delta$ : 8.60 (s, 1H), 8.01 (s, 1H), 7.96 (d,  $J = 8.52$  Hz, 1H), 7.92–7.88 (m, 2H), 7.64 (dd,  $J_1 = 8.56$  Hz,  $J_2 = 1.28$  Hz, 1H), 7.61 (br, 2H), 7.57–7.53 (m, 2H), 5.46–5.43 (m, 1H), 4.19–4.14 (m, 1H), 4.04–3.99 (m, 1H), 2.80–2.71 (m, 1H), 2.11–2.03 (m, 1H), 1.98–1.88 (m, 2H);  $^{13}\text{C}$  NMR (100 Mz,  $\text{CDCl}_3$ )  $\delta$ : 152.3, 138.0, 137.8, 133.4, 133.2, 132.6, 129.2, 128.3, 127.7, 126.9, 126.8, 126.2, 124.8, 124.2, 122.5, 75.4, 69.2, 31.0, 25.6. HRMS (ESI) ( $[\text{M}+\text{H}]^+$ ) Calcd. For  $\text{C}_{19}\text{H}_{18}\text{NO}_2$ : 292.1338, Found: 292.1335.

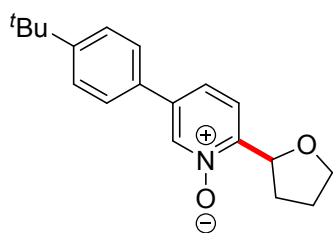

#### 5-(4-(*tert*-Butyl)phenyl)-2-(tetrahydrofuran-2-yl)pyridine 1-oxide

**3g:** White solid.  $^1\text{H}$  NMR (400 MHz,  $\text{CDCl}_3$ )  $\delta$ : 8.47 (s, 1H), 7.56 (d,  $J = 8.24$  Hz, 1H), 7.52–7.47 (m, 5H), 5.43–5.39 (m, 1H), 4.17–4.11 (m, 1H), 4.02–3.97 (m, 1H), 2.76–2.71 (m, 1H), 2.10–2.01 (m, 1H), 1.97–1.90 (m, 2H), 1.36 (s, 9H);  $^{13}\text{C}$  NMR (100 Mz,  $\text{CDCl}_3$ )  $\delta$ : 152.3, 151.9, 137.9, 137.4, 132.4, 126.5, 126.2, 124.6, 122.3, 75.3, 69.1, 34.7, 31.2, 31.0, 25.6. HRMS (ESI) ( $[\text{M}+\text{H}]^+$ ) Calcd. For  $\text{C}_{19}\text{H}_{24}\text{NO}_2$ : 298.1807, Found: 298.1803.

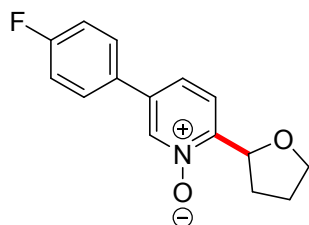

#### 5-(4-Fluorophenyl)-2-(tetrahydrofuran-2-yl)pyridine 1-oxide

**3h:** Yellow solid.  $^1\text{H}$  NMR (400 MHz,  $\text{CDCl}_3$ )  $\delta$ : 8.41 (s, 1H), 7.56 (d,  $J = 8.20$  Hz, 1H), 7.51–7.48 (m, 2H), 7.42 (d,  $J = 8.20$  Hz, 1H), 7.18–7.14 (m, 2H), 5.38 (t,  $J = 6.38$  Hz, 1H), 4.15–4.10 (m, 1H), 4.01–3.95 (m, 1H), 2.75–2.69 (m, 1H), 2.11–2.00 (m, 1H), 1.95–1.84 (m, 2H);  $^{13}\text{C}$  NMR (100 Mz,  $\text{CDCl}_3$ )  $\delta$ : 163.3 (d,  $J_{\text{C-F}} = 247.91$ ), 152.3, 137.4, 137.1, 131.5 (d,  $J_{\text{C-F}} = 3.41$ ), 128.6 (d,  $J_{\text{C-F}} = 8.31$ ), 124.4, 122.5, 116.3 (d,  $J_{\text{C-F}} = 21.74$ ), 75.3, 69.1, 31.0, 25.6. HRMS (ESI) ( $[\text{M}+\text{H}]^+$ ) Calcd. For  $\text{C}_{15}\text{H}_{15}\text{FNO}_2$ : 260.1087, Found: 260.1087.

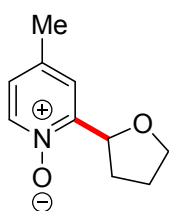

#### 4-Methyl-2-(tetrahydrofuran-2-yl)pyridine 1-oxide

**3i:** Colourless liquid.  $^1\text{H}$  NMR (400 MHz,  $\text{CDCl}_3$ )  $\delta$ : 8.08 (d,  $J = 6.52$  Hz, 1H), 7.31 (s, 1H), 6.97–6.96 (m, 1H), 5.33 (t,  $J = 6.60$  Hz, 1H), 4.12–4.07 (m, 1H), 3.98–3.92 (m, 1H), 2.74–2.65 (m, 1H), 2.34 (s, 3H), 2.06–1.96 (m, 1H), 1.92–1.78 (m, 2H);  $^{13}\text{C}$  NMR (100 Mz,  $\text{CDCl}_3$ )  $\delta$ : 153.0, 138.7, 137.6, 124.5, 123.0, 75.3, 69.1, 31.0, 25.6, 20.5. HRMS (ESI) ( $[\text{M}+\text{H}]^+$ ) Calcd. For  $\text{C}_{10}\text{H}_{14}\text{NO}_2$ : 180.1025, Found: 180.1025.

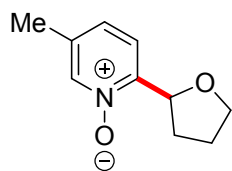

### 5-Methyl-2-(tetrahydrofuran-2-yl)pyridine 1-oxide

**3j:** Colourless liquid.  $^1\text{H}$  NMR (400 MHz,  $\text{CDCl}_3$ )  $\delta$ : 8.06 (s, 1H), 7.38 (d,  $J = 8.08$  Hz, 1H), 7.10 (d,  $J = 8.04$  Hz, 1H), 5.33 (t,  $J = 6.48$  Hz, 1H), 4.11–4.06 (m, 1H), 3.97–3.92 (m, 1H), 2.72–2.62 (m, 1H), 2.28 (s, 3H), 2.05–1.95 (m, 1H), 1.91–1.78 (m, 2H);  $^{13}\text{C}$  NMR (100 Mz,  $\text{CDCl}_3$ )  $\delta$ : 151.0, 139.2, 134.3, 127.3, 121.9, 75.3, 69.0, 31.0, 25.5, 17.9. HRMS (ESI) ( $[\text{M}+\text{H}]^+$ ) Calcd. For  $\text{C}_{10}\text{H}_{14}\text{NO}_2$ : 180.1025, Found: 180.1024.

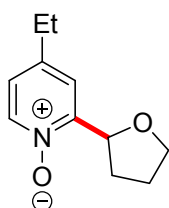

### 4-Ethyl-2-(tetrahydrofuran-2-yl)pyridine 1-oxide

**3k:** Yellow liquid.  $^1\text{H}$  NMR (400 MHz,  $\text{CDCl}_3$ )  $\delta$ : 8.11 (d,  $J = 6.52$  Hz, 1H), 7.33 (s, 1H), 7.00 (d,  $J = 5.16$  Hz, 1H), 5.35 (t,  $J = 6.46$  Hz, 1H), 4.14–4.09 (m, 1H), 4.00–3.94 (m, 1H), 2.76–2.70 (m, 1H), 2.65 (q,  $J = 7.53$  Hz, 2H), 2.07–1.97 (m, 1H), 1.93–1.80 (m, 2H), 1.25 (t,  $J = 7.54$  Hz, 3H);  $^{13}\text{C}$  NMR (100 Mz,  $\text{CDCl}_3$ )  $\delta$ : 153.1, 143.6, 138.9, 123.2, 121.7, 75.3, 69.1, 30.9, 27.7, 25.6, 14.3. HRMS (ESI) ( $[\text{M}+\text{H}]^+$ ) Calcd. For  $\text{C}_{11}\text{H}_{16}\text{NO}_2$ : 194.1181, Found: 194.1183.

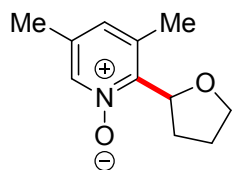

### 3,5-Dimethyl-2-(tetrahydrofuran-2-yl)pyridine 1-oxide

**3l:** Colourless solid.  $^1\text{H}$  NMR (400 MHz,  $\text{CDCl}_3$ )  $\delta$ : 7.94 (s, 1H), 6.85 (s, 1H), 5.73 (t,  $J = 7.92$  Hz, 1H), 4.10–4.04 (m, 1H), 3.93–3.88 (m, 1H), 2.56–2.48 (m, 1H), 2.39 (s, 3H), 2.21 (s, 3H), 2.10–2.00 (m, 2H), 1.93–1.83 (m, 1H);  $^{13}\text{C}$  NMR (100 Mz,  $\text{CDCl}_3$ )  $\delta$ : 148.0, 137.4, 134.6, 133.2, 130.7, 75.5, 68.5, 29.9, 26.6, 18.9, 17.6. HRMS (ESI) ( $[\text{M}+\text{H}]^+$ ) Calcd. For  $\text{C}_{11}\text{H}_{16}\text{NO}_2$ : 194.1181, Found: 194.1180.

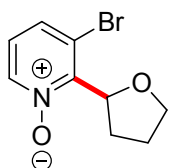

### 3-Bromo-2-(tetrahydrofuran-2-yl)pyridine 1-oxide

**3m**: Yellow liquid.  $^1\text{H}$  NMR (400 MHz,  $\text{CDCl}_3$ )  $\delta$ : 7.38 (d,  $J = 5.96$  Hz, 1H), 7.20–7.17 (m, 2H), 5.37 (t,  $J = 6.72$  Hz, 1H), 4.12–4.07 (m, 1H), 3.98–3.93 (m, 1H), 2.75–2.66 (m, 1H), 2.05–1.95 (m, 1H), 1.91–1.78 (m, 2H);  $^{13}\text{C}$  NMR (100 Mz,  $\text{CDCl}_3$ )  $\delta$ : 153.8, 148.9, 125.2, 124.2, 120.0, 75.6, 69.0, 31.0, 25.6. HRMS (ESI) ( $[\text{M}+\text{H}]^+$ ) Calcd. For  $\text{C}_9\text{H}_{11}\text{BrNO}_2$ : 243.9973, Found: 243.9972.

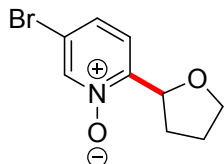

### 5-Bromo-2-(tetrahydrofuran-2-yl)pyridine 1-oxide

**3m'**: Yellow liquid.  $^1\text{H}$  NMR (400 MHz,  $\text{CDCl}_3$ )  $\delta$ : 8.33 (s, 1H), 7.38 (br, 2H), 5.24 (t,  $J = 6.42$  Hz, 1H), 4.10–4.05 (m, 1H), 3.97–3.91 (m, 1H), 2.71–2.61 (m, 1H), 2.06–1.95 (m, 1H), 1.89–1.76 (m, 2H);  $^{13}\text{C}$  NMR (100 Mz,  $\text{CDCl}_3$ )  $\delta$ : 153.0, 140.6, 128.6, 122.8, 117.9, 75.1, 69.1, 30.7, 25.5. HRMS (ESI) ( $[\text{M}+\text{H}]^+$ ) Calcd. For  $\text{C}_9\text{H}_{11}\text{BrNO}_2$ : 243.9973, Found: 243.9966.

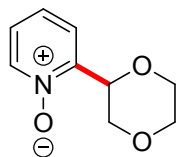

### 2-(1,4-Dioxan-2-yl)pyridine 1-oxide

**3o**: Colourless solid.  $^1\text{H}$  NMR (400 MHz,  $\text{CDCl}_3$ )  $\delta$ : 8.19 (d,  $J = 6.36$  Hz, 1H), 7.56 (d,  $J = 7.76$  Hz, 1H), 7.32–7.29 (m, 1H), 7.23–7.19 (m, 1H), 5.31–5.28 (m, 1H), 4.52–4.83 (m, 1H), 3.97 (d,  $J = 6.24$  Hz, 2H), 3.84–3.81 (m, 1H), 3.75–3.67 (m, 1H), 3.24–3.19 (m, 1H);  $^{13}\text{C}$  NMR (100 Mz,  $\text{CDCl}_3$ )  $\delta$ : 148.9, 139.3, 125.9, 124.5, 123.9, 72.2, 68.6, 67.2, 66.4. HRMS (ESI) ( $[\text{M}+\text{H}]^+$ ) Calcd. For  $\text{C}_9\text{H}_{12}\text{NO}_3$ : 182.0817, Found: 182.0815.

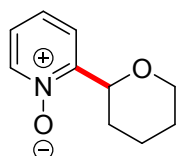

### 2-(Tetrahydro-2H-pyran-2-yl)pyridine 1-oxide

**3p**: Colourless solid.  $^1\text{H}$  NMR (400 MHz,  $\text{CDCl}_3$ )  $\delta$ : 8.19 (d,  $J = 6.40$  Hz, 1H), 7.55 (dd,  $J = 7.84$  Hz,  $J = 1.44$  Hz, 1H), 7.31–7.30 (m, 1H), 7.19–7.15 (m, 1H), 5.00–4.98 (m, 1H), 4.18–4.15 (m, 1H), 3.71–3.65 (m, 1H), 2.45–2.42 (m, 1H), 1.94–1.91 (m, 1H), 1.82–1.79 (m, 2H), 1.64–1.61 (m, 1H), 1.26–1.20 (m, 1H);  $^{13}\text{C}$  NMR (100 Mz,  $\text{CDCl}_3$ )  $\delta$ : 139.2, 126.0, 123.7, 123.1, 73.7, 68.9, 29.6, 25.9, 23.1. HRMS (ESI) ( $[\text{M}+\text{H}]^+$ ) Calcd. For  $\text{C}_{10}\text{H}_{14}\text{NO}_2$ : 180.1025, Found: 180.1028.



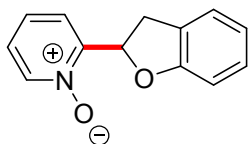

### 2-(2,3-Dihydrobenzofuran-2-yl)pyridine 1-oxide

**3q:** Yellow solid.  $^1\text{H}$  NMR (400 MHz,  $\text{CDCl}_3$ )  $\delta$ : 8.28 (d,  $J = 6.12$  Hz, 1H), 7.54 (dd,  $J_1 = 7.72$  Hz,  $J_2 = 1.28$  Hz, 1H), 7.32–7.28 (m, 1H), 7.26–7.23 (m, 1H), 7.20–7.17 (m, 2H), 6.96 (d,  $J = 8.28$  Hz, 1H), 6.93–6.90 (m, 1H), 6.20–6.16 (m, 1H), 4.04–3.97 (m, 1H), 3.19–3.13 (m, 1H);  $^{13}\text{C}$  NMR (100 Mz,  $\text{CDCl}_3$ )  $\delta$ : 159.0, 139.5, 128.2, 126.1, 125.9, 125.3, 124.4, 122.7, 121.4, 109.5, 78.0, 35.5. HRMS (ESI) ( $[\text{M}+\text{H}]^+$ ) Calcd. For  $\text{C}_{13}\text{H}_{12}\text{NO}_2$ : 214.0868, Found: 214.0861.

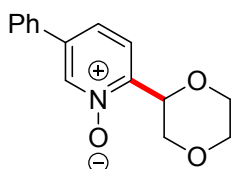

### 2-(1,4-Dioxan-2-yl)-5-phenylpyridine 1-oxide

**3r:** Colourless solid.  $^1\text{H}$  NMR (400 MHz,  $\text{CDCl}_3$ )  $\delta$ : 8.44 (s, 1H), 7.60 (d,  $J = 8.24$  Hz, 1H), 7.53–7.44 (m, 6H), 5.36–5.33 (m, 1H), 4.56–4.52 (m, 1H), 3.99 (d,  $J = 6.12$  Hz, 2H), 3.86–3.83 (m, 1H), 3.77–3.68 (m, 1H), 3.29–3.24 (m, 1H);  $^{13}\text{C}$  NMR (100 Mz,  $\text{CDCl}_3$ )  $\delta$ : 147.1, 138.7, 137.4, 135.1, 129.3, 129.1, 126.8, 124.5, 123.7, 72.2, 68.7, 67.2, 66.4. HRMS (ESI) ( $[\text{M}+\text{H}]^+$ ) Calcd. For  $\text{C}_{15}\text{H}_{16}\text{NO}_3$ : 258.1130, Found: 258.1124.

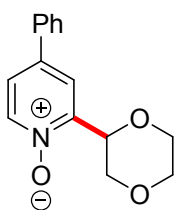

### 2-(1,4-Dioxan-2-yl)-4-phenylpyridine 1-oxide

**3s:** White solid.  $^1\text{H}$  NMR (400 MHz,  $\text{CDCl}_3$ )  $\delta$ : 8.23 (d,  $J = 6.76$  Hz, 1H), 7.81–7.80 (m, 1H), 7.63 (d,  $J = 7.32$  Hz, 2H), 7.51–7.47 (m, 2H), 7.45–7.41 (m, 2H), 5.36–5.34 (m, 1H), 4.58–4.55 (m, 1H), 4.01 (d,  $J = 6.12$  Hz, 2H), 3.87–3.84 (m, 1H), 3.79–3.71 (m, 1H), 3.31–3.26 (m, 1H);  $^{13}\text{C}$  NMR (100 Mz,  $\text{CDCl}_3$ )  $\delta$ : 148.7, 139.3, 138.7, 136.5, 129.2, 129.0, 126.5, 122.1, 121.5, 72.4, 68.8, 67.3, 66.5. HRMS (ESI) ( $[\text{M}+\text{H}]^+$ ) Calcd. For  $\text{C}_{15}\text{H}_{16}\text{NO}_3$ : 258.1130, Found: 258.1127.

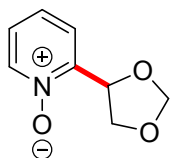

### 2-(1,3-Dioxolan-4-yl)pyridine 1-oxide

**3t:** Yellow solid.  $^1\text{H}$  NMR (400 MHz,  $\text{CDCl}_3$ )  $\delta$ : 8.19 (d,  $J = 6.48$  Hz, 1H), 7.52 (d,  $J = 7.80$  Hz, 1H), 7.32–7.29 (m, 1H), 7.24–7.20 (m, 1H), 5.40 (d,  $J = 6.16$  Hz, 1H), 5.20 (s, 1H), 5.03 (s, 1H), 4.48–4.44 (m, 1H), 3.93–3.90 (m, 1H);  $^{13}\text{C}$  NMR (100 Mz,  $\text{CDCl}_3$ )  $\delta$ : 150.9, 139.0, 125.9, 124.4, 122.6, 95.5, 70.8 (d,  $J = 232.18$ ), 65.4 (d,  $J = 13.83$ ). HRMS (ESI) ( $[\text{M}+\text{H}]^+$ ) Calcd. For  $\text{C}_8\text{H}_{10}\text{NO}_3$ : 168.0661, Found: 168.0665.

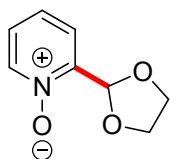

### 2-(1,3-Dioxolan-2-yl)pyridine 1-oxide

**3t'** : Yellow solid.  $^1\text{H}$  NMR (400 MHz,  $\text{CDCl}_3$ )  $\delta$ : 8.24–8.22 (m, 1H), 7.56–7.54 (m, 1H), 7.26 (br, 2H), 6.36 (s, 1H), 4.09 (br, 4H);  $^{13}\text{C}$  NMR (100 Mz,  $\text{CDCl}_3$ )  $\delta$ : 147.5, 139.8, 125.8, 125.3, 123.6, 97.3, 65.4. HRMS (ESI) ( $[\text{M}+\text{H}]^+$ ) Calcd. For  $\text{C}_8\text{H}_{10}\text{NO}_3$ : 168.0661, Found: 168.0658.

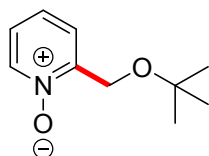

### 2-(tert-Butoxymethyl)pyridine 1-oxide

**3u:** Colourless liquid.  $^1\text{H}$  NMR (400 MHz,  $\text{CDCl}_3$ )  $\delta$ : 8.23 (br, 1H), 7.61 (d,  $J = 7.00$  Hz, 1H), 7.30–7.27 (m, 1H), 7.18 (br, 1H), 4.71 (s, 2H), 1.31 (s, 9H);  $^{13}\text{C}$  NMR (100 Mz,  $\text{CDCl}_3$ )  $\delta$ : 138.8, 125.8, 123.4, 123.3, 74.3, 58.8, 27.5. HRMS (ESI) ( $[\text{M}+\text{H}]^+$ ) Calcd. For  $\text{C}_{10}\text{H}_{16}\text{NO}_2$ : 182.1181, Found: 182.1179.

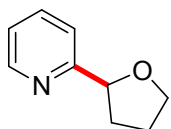

### 2-(Tetrahydrofuran-2-yl)pyridine

**4a:** Colourless liquid.  $^1\text{H}$  NMR (400 MHz,  $\text{CDCl}_3$ )  $\delta$ : 8.52 (d,  $J = 3.36$  Hz, 1H), 7.66–7.62 (m, 1H), 7.41 (d,  $J = 7.80$  Hz, 1H), 7.14–7.11 (m, 1H), 5.00 (t,  $J = 6.06$  Hz, 1H), 4.11–4.06 (m, 1H), 3.98–3.93 (m, 1H), 2.41–2.38 (m, 1H), 1.97–1.96 (m, 3H);  $^{13}\text{C}$  NMR (100 Mz,  $\text{CDCl}_3$ )  $\delta$ : 162.9, 148.9, 136.5, 121.9, 119.7, 81.2, 68.9, 32.9, 25.7. HRMS (ESI) ( $[\text{M}+\text{H}]^+$ ) Calcd. For  $\text{C}_9\text{H}_{12}\text{NO}$ : 150.0919, Found: 150.0921.

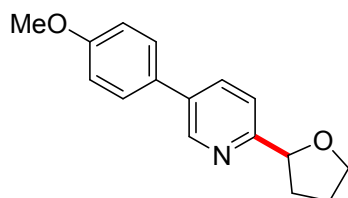

#### 5-(4-Methoxyphenyl)-2-(tetrahydrofuran-2-yl)pyridine

**4e:** White solid.  $^1\text{H}$  NMR (400 MHz,  $\text{CDCl}_3$ )  $\delta$ : 8.75 (s, 1H), 7.82 (d,  $J = 8.00$  Hz, 1H), 7.52–7.47 (m, 3H), 7.01 (d,  $J = 8.20$  Hz, 2H), 5.07 (t,  $J = 6.16$  Hz, 1H), 4.16–4.11 (m, 1H), 4.03–3.98 (m, 1H), 3.86 (s, 3H), 2.49–2.39 (m, 1H), 2.09–2.00 (m, 3H);  $^{13}\text{C}$  NMR (100 Mz,  $\text{CDCl}_3$ )  $\delta$ : 161.0, 159.6, 147.1, 134.6, 134.4, 130.2, 128.1, 119.7, 114.5, 81.2, 69.0, 55.3, 33.0, 25.8. HRMS (ESI) ( $[\text{M}+\text{H}]^+$ ) Calcd. For  $\text{C}_{16}\text{H}_{18}\text{NO}_2$ : 256.1338, Found: 256.1340.

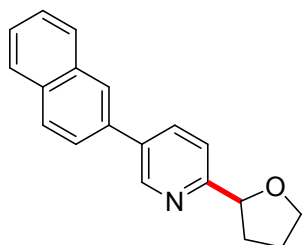

#### 5-(Naphthalen-2-yl)-2-(tetrahydrofuran-2-yl)pyridine

**4f:** White solid.  $^1\text{H}$  NMR (400 MHz,  $\text{CDCl}_3$ )  $\delta$ : 8.92 (s, 1H), 8.05 (s, 1H), 8.02–7.89 (m, 4H), 7.72 (d,  $J = 8.36$  Hz, 1H), 7.58–7.53 (m, 3H), 5.14–5.10 (m, 1H), 4.20–4.15 (m, 1H), 4.06–4.01 (m, 1H), 2.53–2.47 (m, 1H), 2.13–2.03 (m, 3H);  $^{13}\text{C}$  NMR (100 Mz,  $\text{CDCl}_3$ )  $\delta$ : 161.9, 147.7, 135.2, 135.1, 135.0, 133.6, 132.8, 128.8, 128.2, 127.7, 126.6, 126.3, 126.0, 125.1, 119.8, 81.2, 69.1, 33.1, 25.8. HRMS (ESI) ( $[\text{M}+\text{H}]^+$ ) Calcd. For  $\text{C}_{19}\text{H}_{18}\text{NO}$ : 276.1388, Found: 276.1393.

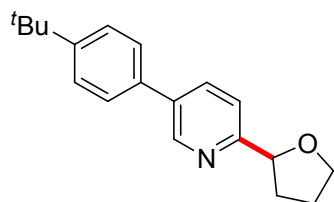

#### 5-(4-(*tert*-Butyl)phenyl)-2-(tetrahydrofuran-2-yl)pyridine

**4g:** Colourless solid.  $^1\text{H}$  NMR (400 MHz,  $\text{CDCl}_3$ )  $\delta$ : 8.79 (s, 1H), 7.87 (d,  $J = 7.88$  Hz, 1H), 7.55–7.50 (m, 5H), 5.08 (t,  $J = 6.46$  Hz, 1H), 4.18–4.12 (m, 1H), 4.04–3.99 (m, 1H), 2.52–2.41 (m, 1H), 2.11–2.01 (m, 3H), 1.38 (s, 9H);  $^{13}\text{C}$  NMR (100 Mz,  $\text{CDCl}_3$ )  $\delta$ : 161.4, 151.0, 147.4, 134.9, 134.8, 134.8, 126.7, 126.0, 119.8, 81.2, 69.1, 34.6, 33.0, 31.3, 25.8. HRMS (ESI) ( $[\text{M}+\text{H}]^+$ ) Calcd. For  $\text{C}_{19}\text{H}_{24}\text{NO}$ : 282.1858, Found: 282.1856.

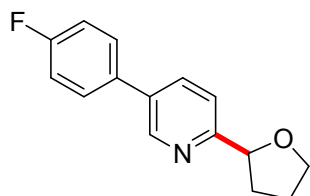

#### 5-(4-Fluorophenyl)-2-(tetrahydrofuran-2-yl)pyridine

**4h:** Colourless liquid.  $^1\text{H}$  NMR (400 MHz,  $\text{CDCl}_3$ )  $\delta$ : 8.73 (s, 1H), 7.83 (d,  $J = 8.08$  Hz, 1H), 7.56–7.51 (m, 3H), 7.19–7.15 (m, 2H), 5.08 (t,  $J = 6.32$  Hz, 1H), 4.17–4.12 (m, 1H), 4.04–3.99 (m, 1H), 2.50–2.41 (m, 1H), 2.09–1.98 (m, 3H);  $^{13}\text{C}$  NMR (100 Mz,  $\text{CDCl}_3$ )  $\delta$ : 162.8 (d,  $J_{\text{C-F}} = 247.82$ ), 161.8, 147.3, 134.8, 134.0 (d,  $J_{\text{C-F}} = 17.60$ ), 128.7 (dd,  $J_{\text{C-F}} = 8.07$ ,  $J_{\text{C-F}} = 1.90$ ), 119.8 (d,  $J_{\text{C-F}} = 1.84$ ), 116.1, 115.9 (d,  $J_{\text{C-F}} = 1.89$ ), 81.1, 69.1 (d,  $J_{\text{C-F}} = 1.80$ ), 33.0 (d,  $J_{\text{C-F}} = 1.78$ ), 25.8 (d,  $J_{\text{C-F}} = 1.89$ ). HRMS (ESI) ( $[\text{M}+\text{H}]^+$ ) Calcd. For  $\text{C}_{15}\text{H}_{15}\text{FNO}$ : 244.1138, Found: 244.1132.

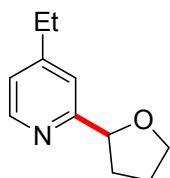

#### 4-Ethyl-2-(tetrahydrofuran-2-yl)pyridine

**4k:** Colourless liquid.  $^1\text{H}$  NMR (400 MHz,  $\text{CDCl}_3$ )  $\delta$ : 8.38 (d,  $J = 4.84$  Hz, 1H), 7.24 (s, 1H), 6.95 (d,  $J = 4.60$  Hz, 1H), 4.95 (t,  $J = 6.30$  Hz, 1H), 4.10–4.04 (m, 1H), 3.96–3.90 (m, 1H), 2.60 (q,  $J = 7.59$  Hz, 2H), 2.43–2.32 (m, 1H), 1.94 (br, 3H), 1.20 (q,  $J = 7.58$  Hz, 3H);  $^{13}\text{C}$  NMR (100 Mz,  $\text{CDCl}_3$ )  $\delta$ : 162.6, 153.5, 148.8, 121.6, 119.2, 81.2, 68.8, 32.9, 28.2, 25.6, 14.2. HRMS (ESI) ( $[\text{M}+\text{H}]^+$ ) Calcd. For  $\text{C}_{11}\text{H}_{16}\text{NO}$ : 178.1232, Found: 178.1234.

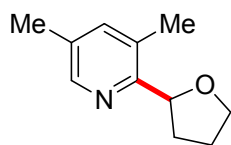

#### 3,5-Dimethyl-2-(tetrahydrofuran-2-yl)pyridine

**4l:** Yellow liquid.  $^1\text{H}$  NMR (400 MHz,  $\text{CDCl}_3$ )  $\delta$ : 8.26 (s, 1H), 7.25 (s, 1H), 5.10 (t,  $J = 7.08$  Hz, 1H), 4.15–4.10 (m, 1H), 3.94–3.89 (m, 1H), 2.34 (s, 3H), 2.27 (s, 3H), 2.24–2.17 (m, 2H), 2.15–2.09 (m, 1H), 2.06–1.96 (m, 1H);  $^{13}\text{C}$  NMR (100 Mz,  $\text{CDCl}_3$ )  $\delta$ : 155.5, 147.0, 138.8, 131.6, 130.5, 78.4, 68.6, 30.5, 26.2, 18.2, 17.9. HRMS (ESI) ( $[\text{M}+\text{H}]^+$ ) Calcd. For  $\text{C}_{11}\text{H}_{16}\text{NO}$ : 178.1232, Found: 178.1231.

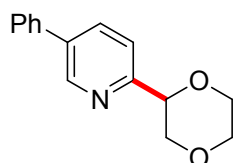

**2-(1,4-Dioxan-2-yl)-5-phenylpyridine**

**4r:** White solid.  $^1\text{H}$  NMR (400 MHz,  $\text{CDCl}_3$ )  $\delta$ : 8.79 (s, 1H), 7.91 (d,  $J = 7.92$  Hz, 1H), 7.58 (d,  $J = 7.48$  Hz, 2H), 7.54 (d,  $J = 8.12$  Hz, 1H), 7.51–7.47 (m, 2H), 7.43–7.40 (m, 1H), 4.83–4.80 (m, 1H), 4.21–4.18 (m, 1H), 4.03–3.95 (m, 2H), 3.86–3.75 (m, 2H), 3.62–3.57 (m, 1H);  $^{13}\text{C}$  NMR (100 Mz,  $\text{CDCl}_3$ )  $\delta$ : 156.6, 147.5, 137.6, 135.8, 135.1, 129.1, 128.1, 127.1, 120.7, 78.0, 71.2, 67.0, 66.4. HRMS (ESI) ( $[\text{M}+\text{H}]^+$ ) Calcd. For  $\text{C}_{15}\text{H}_{16}\text{NO}_2$ : 242.1181, Found: 242.1185.

#### 4. $^1\text{H}$ and $^{13}\text{C}$ NMR spectra of the products

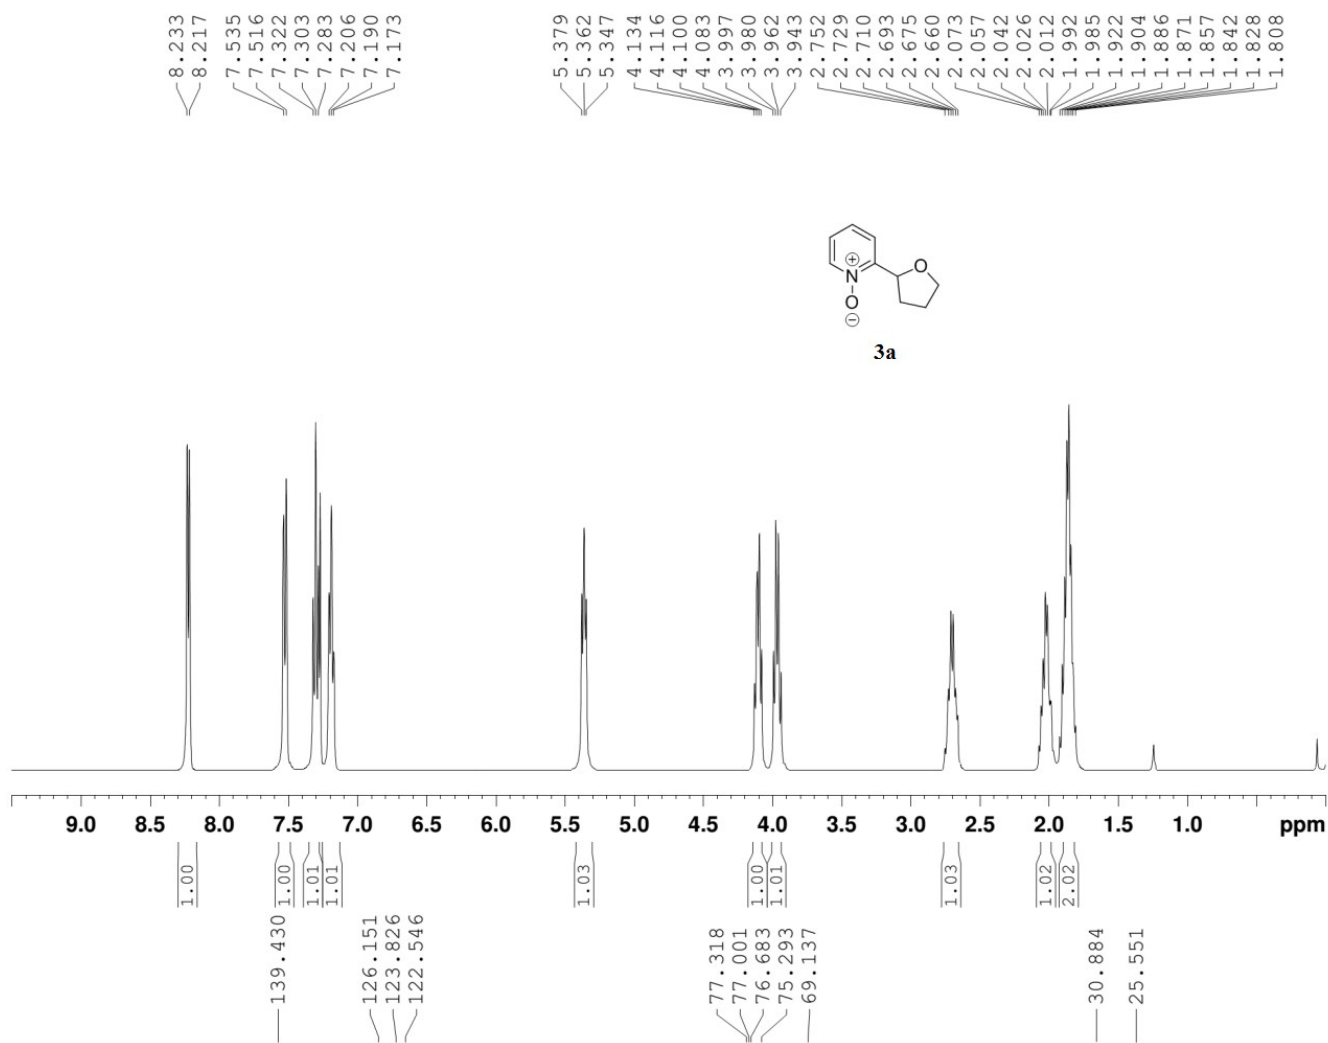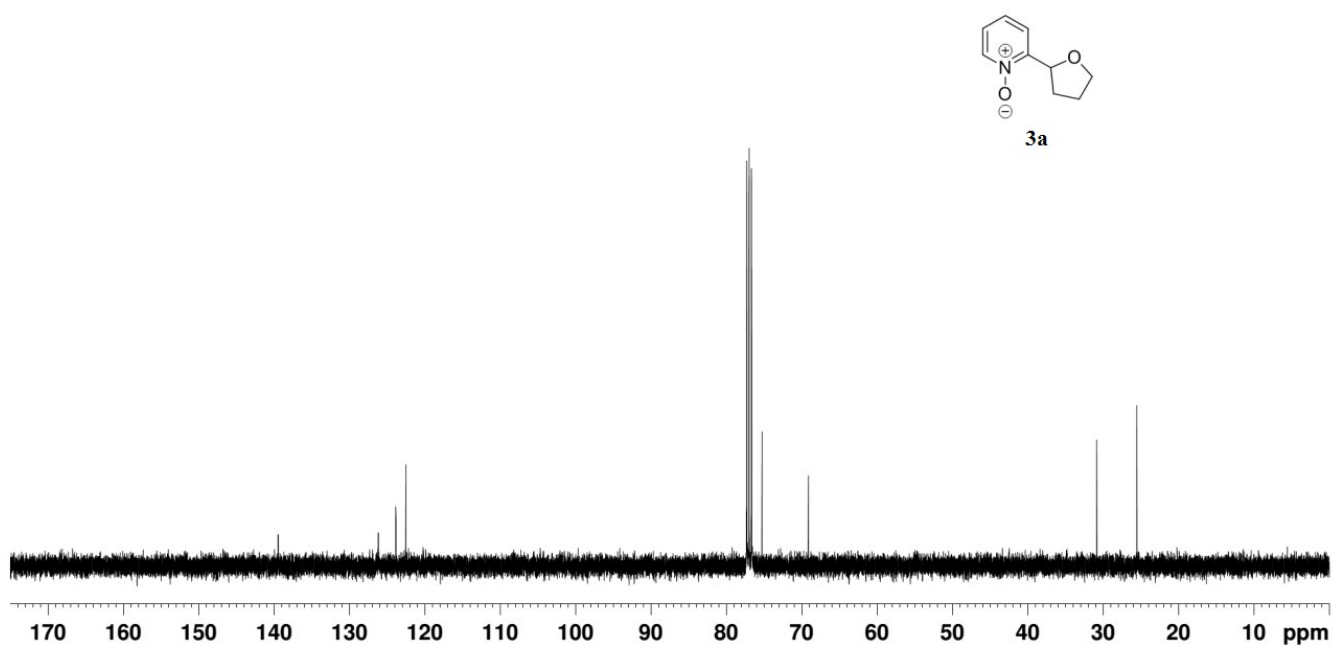

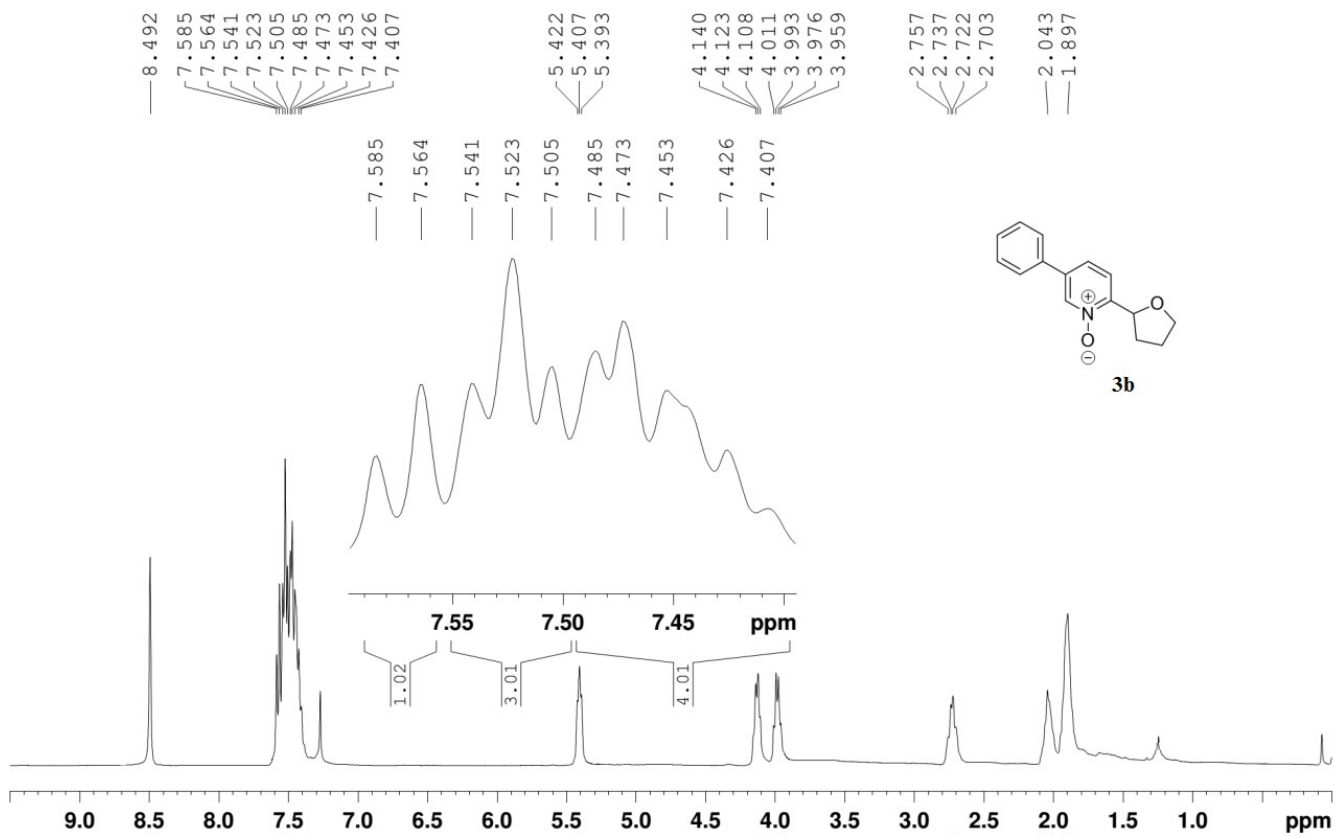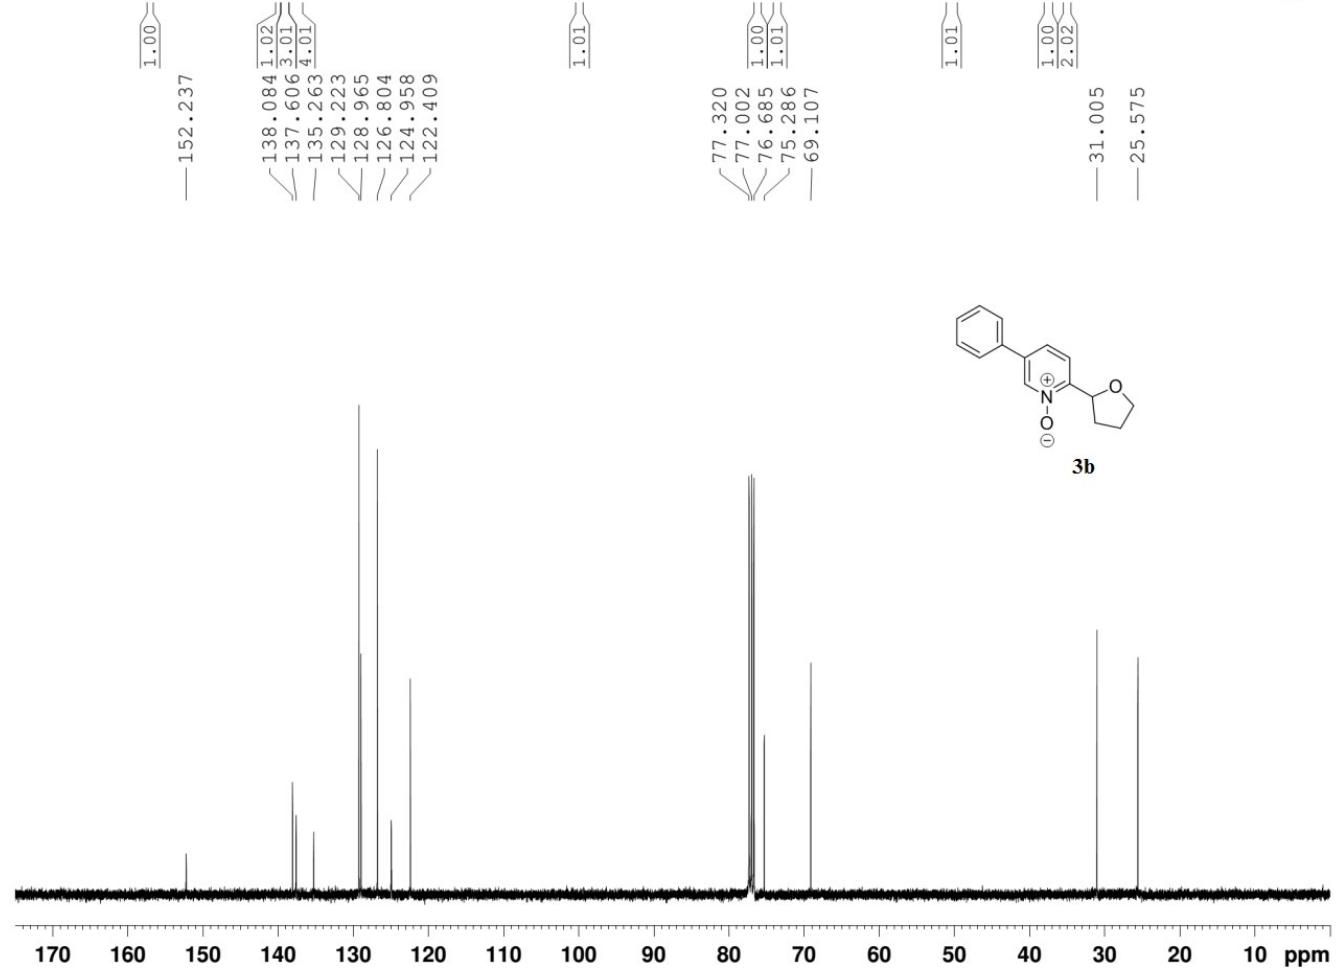

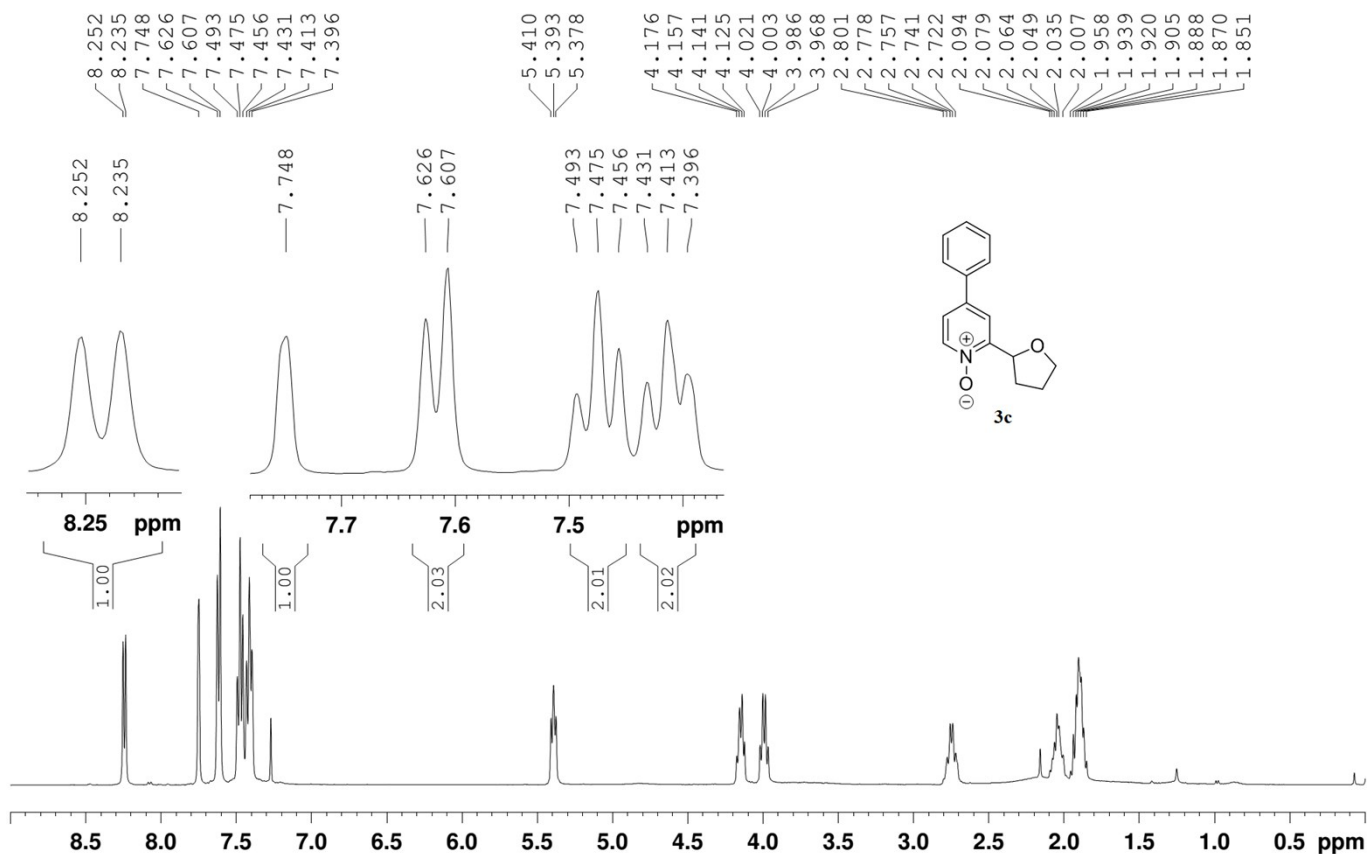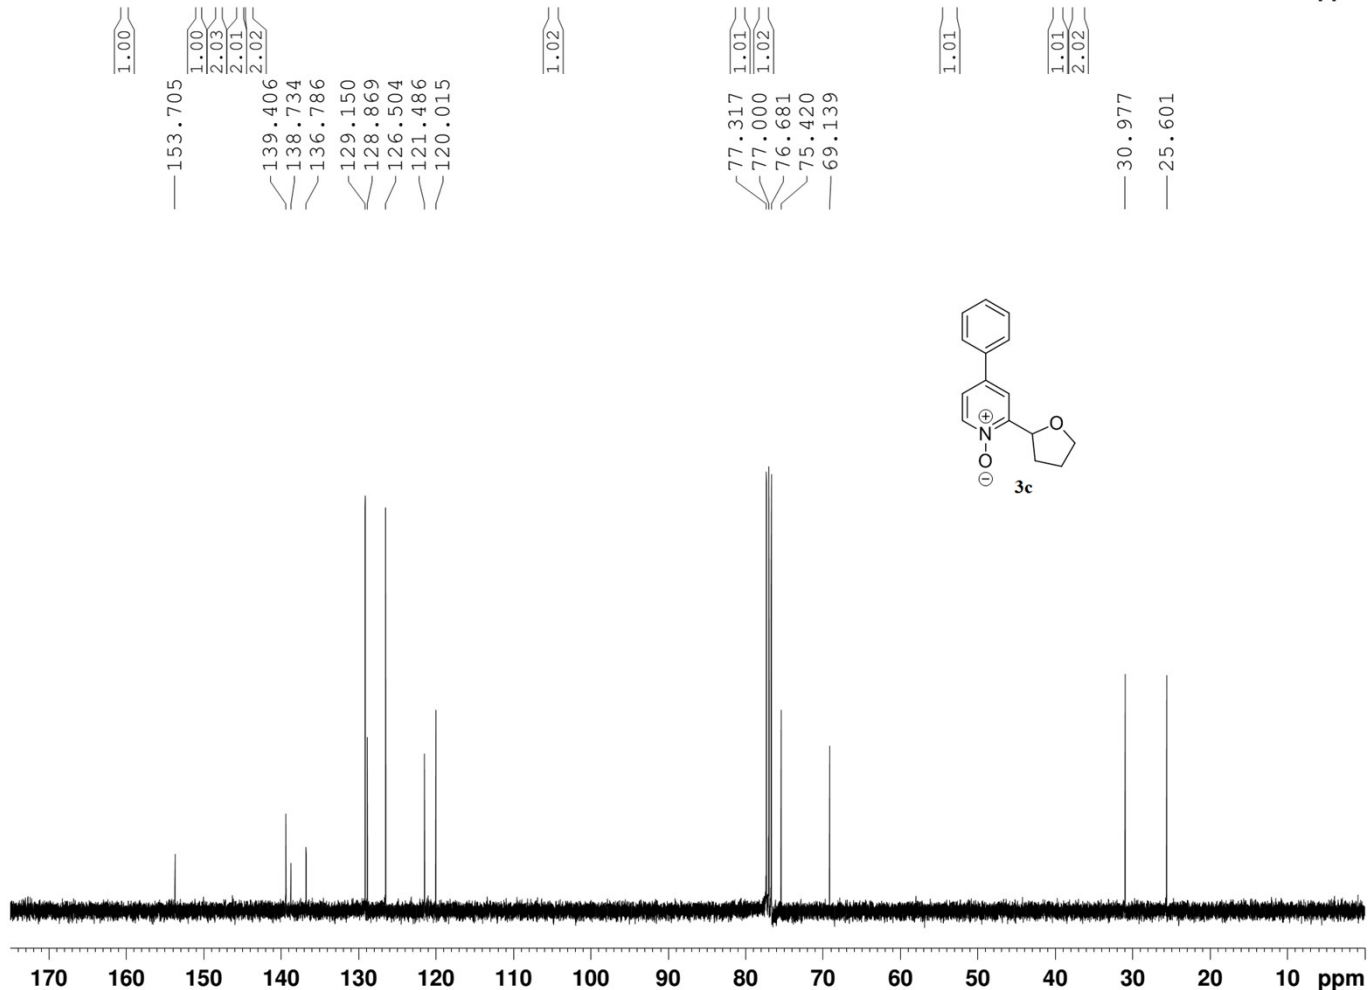



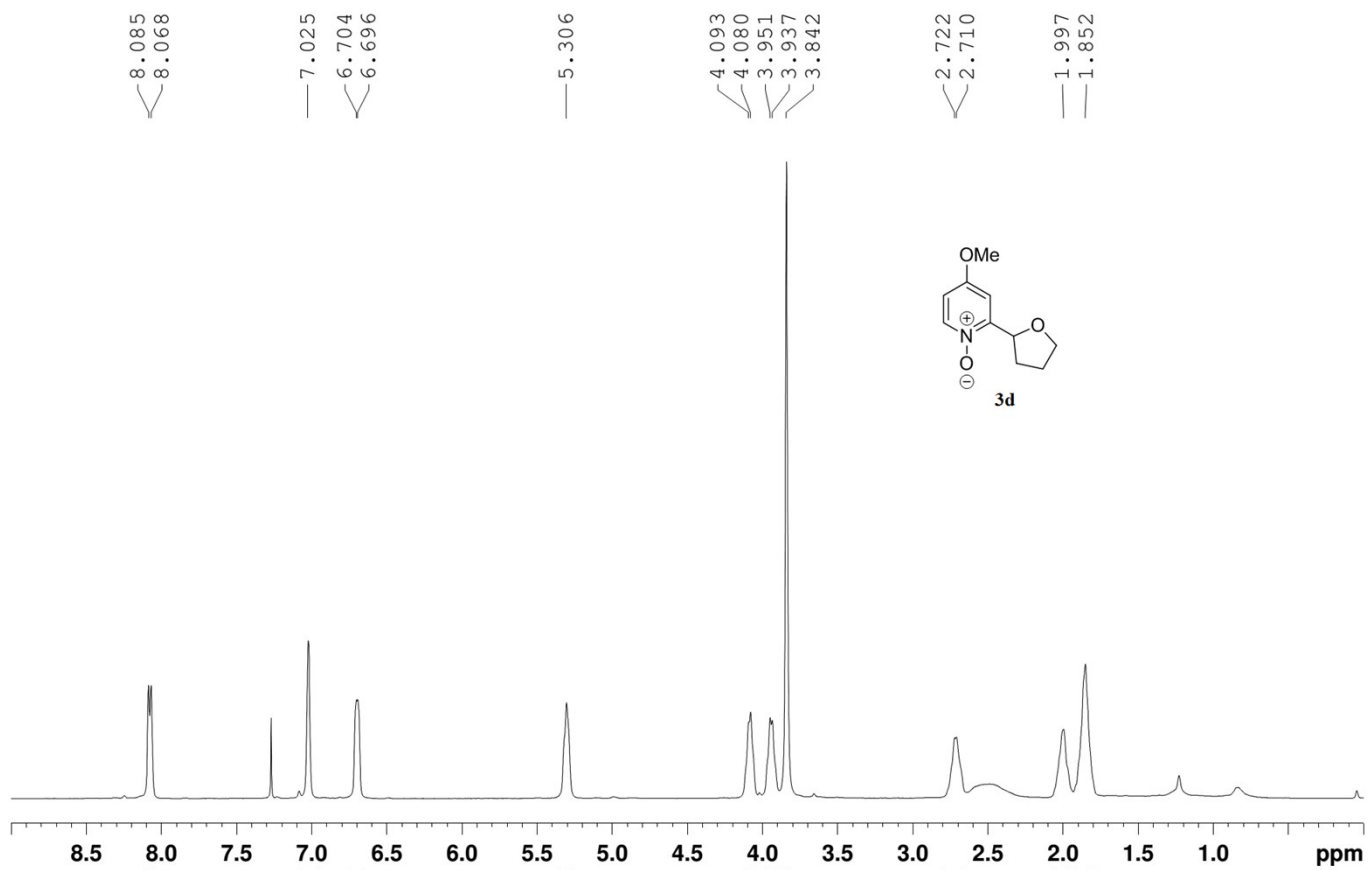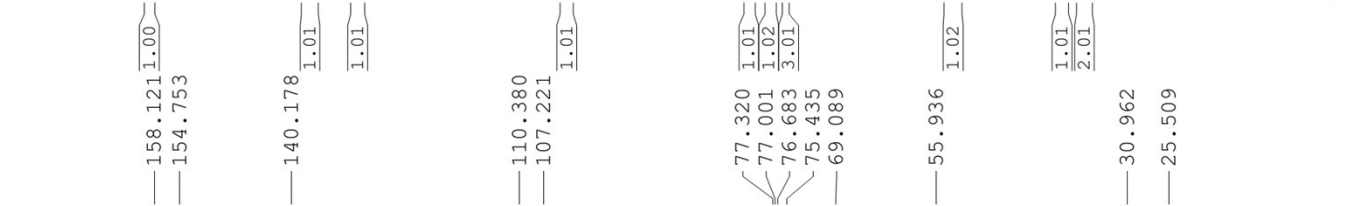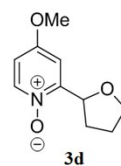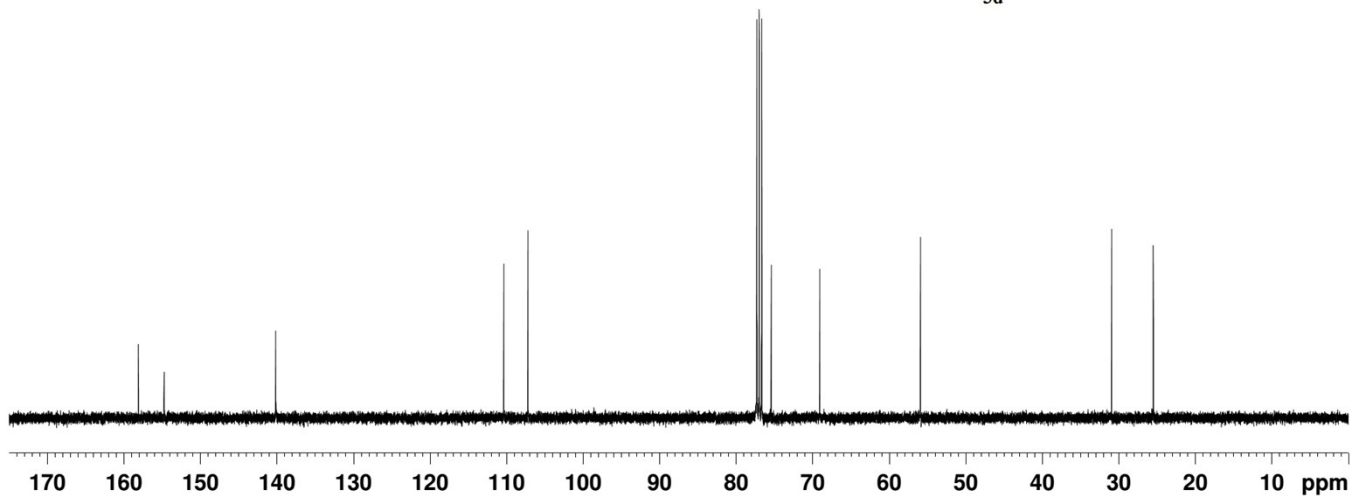

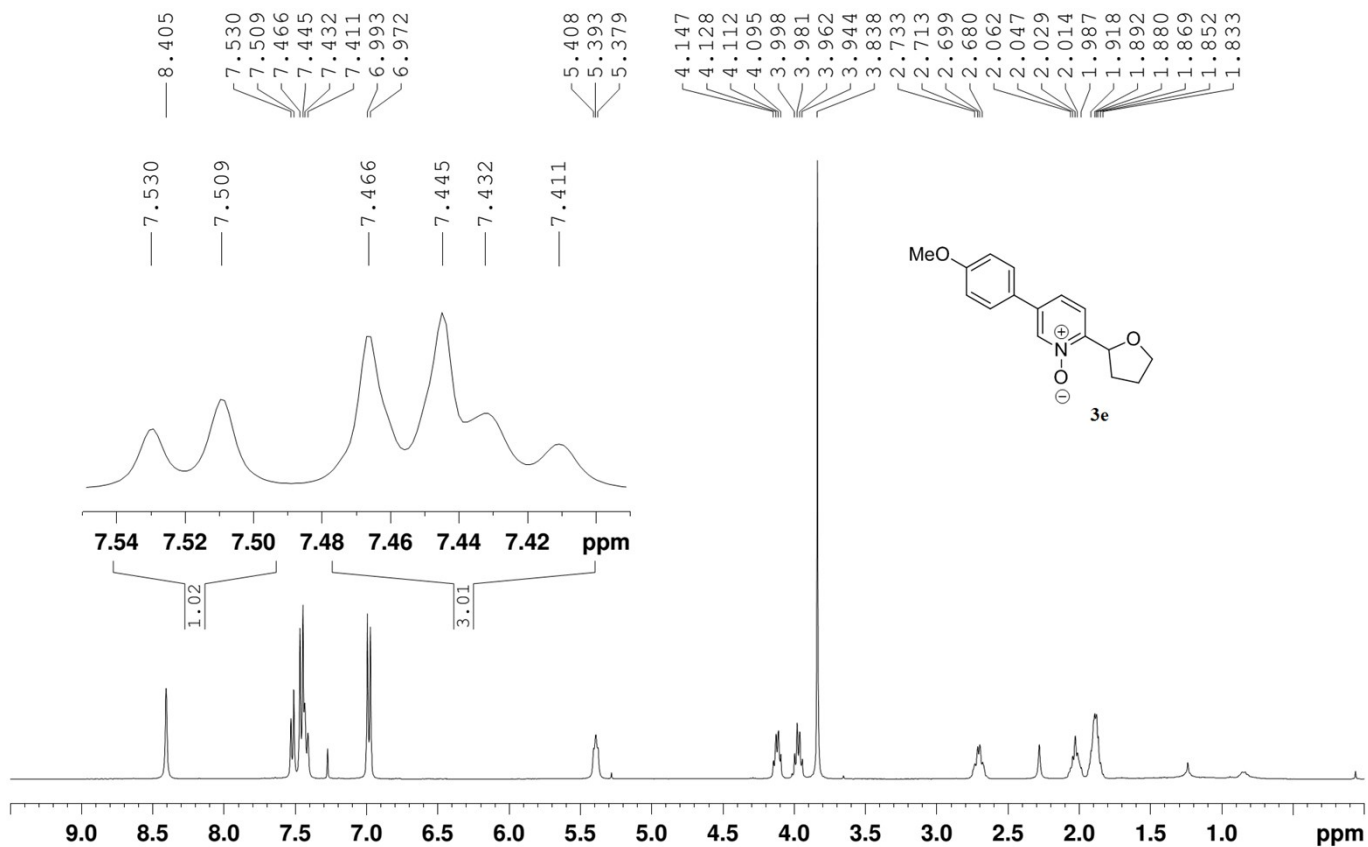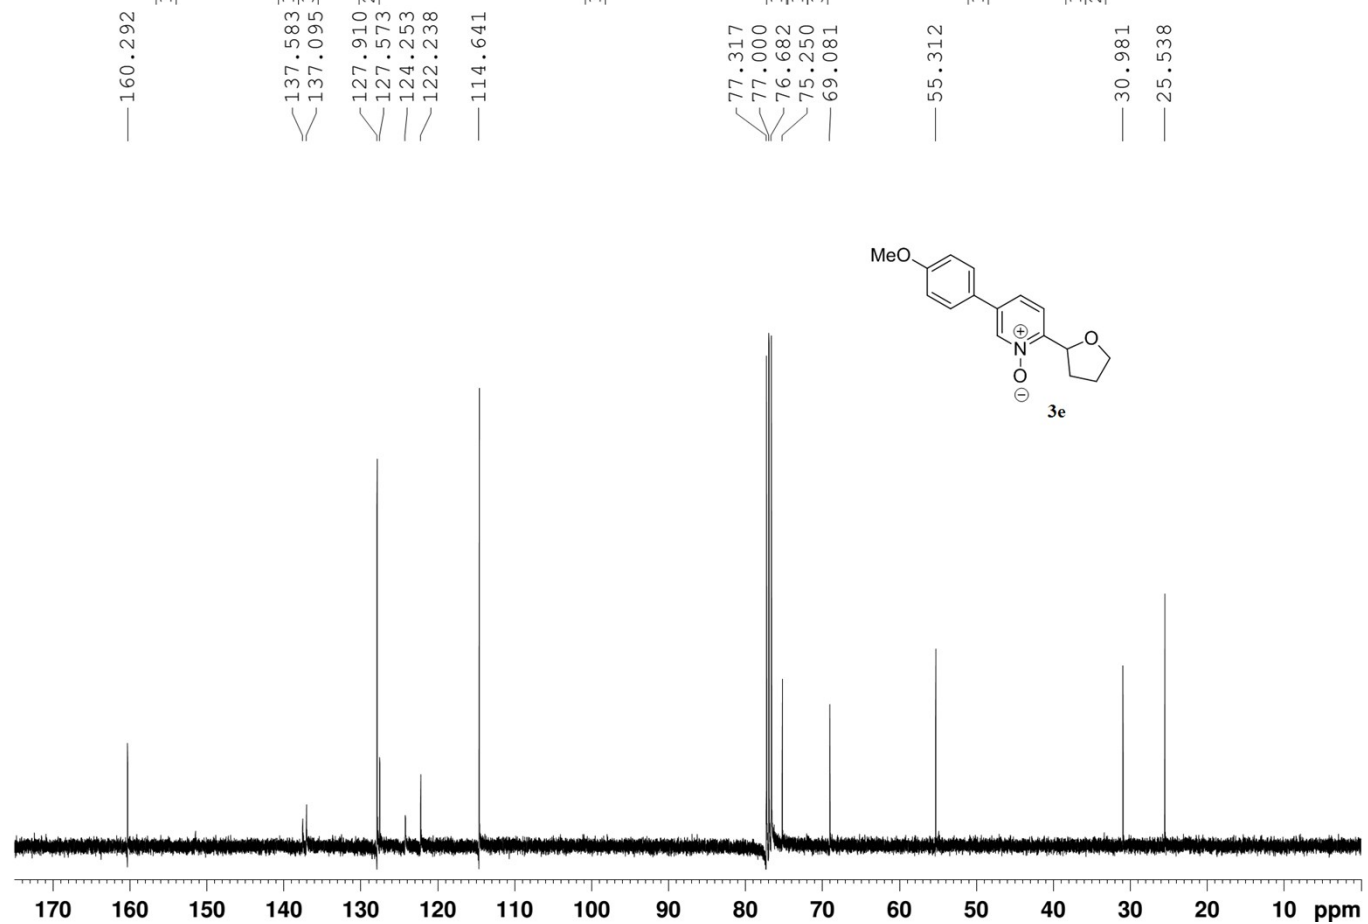

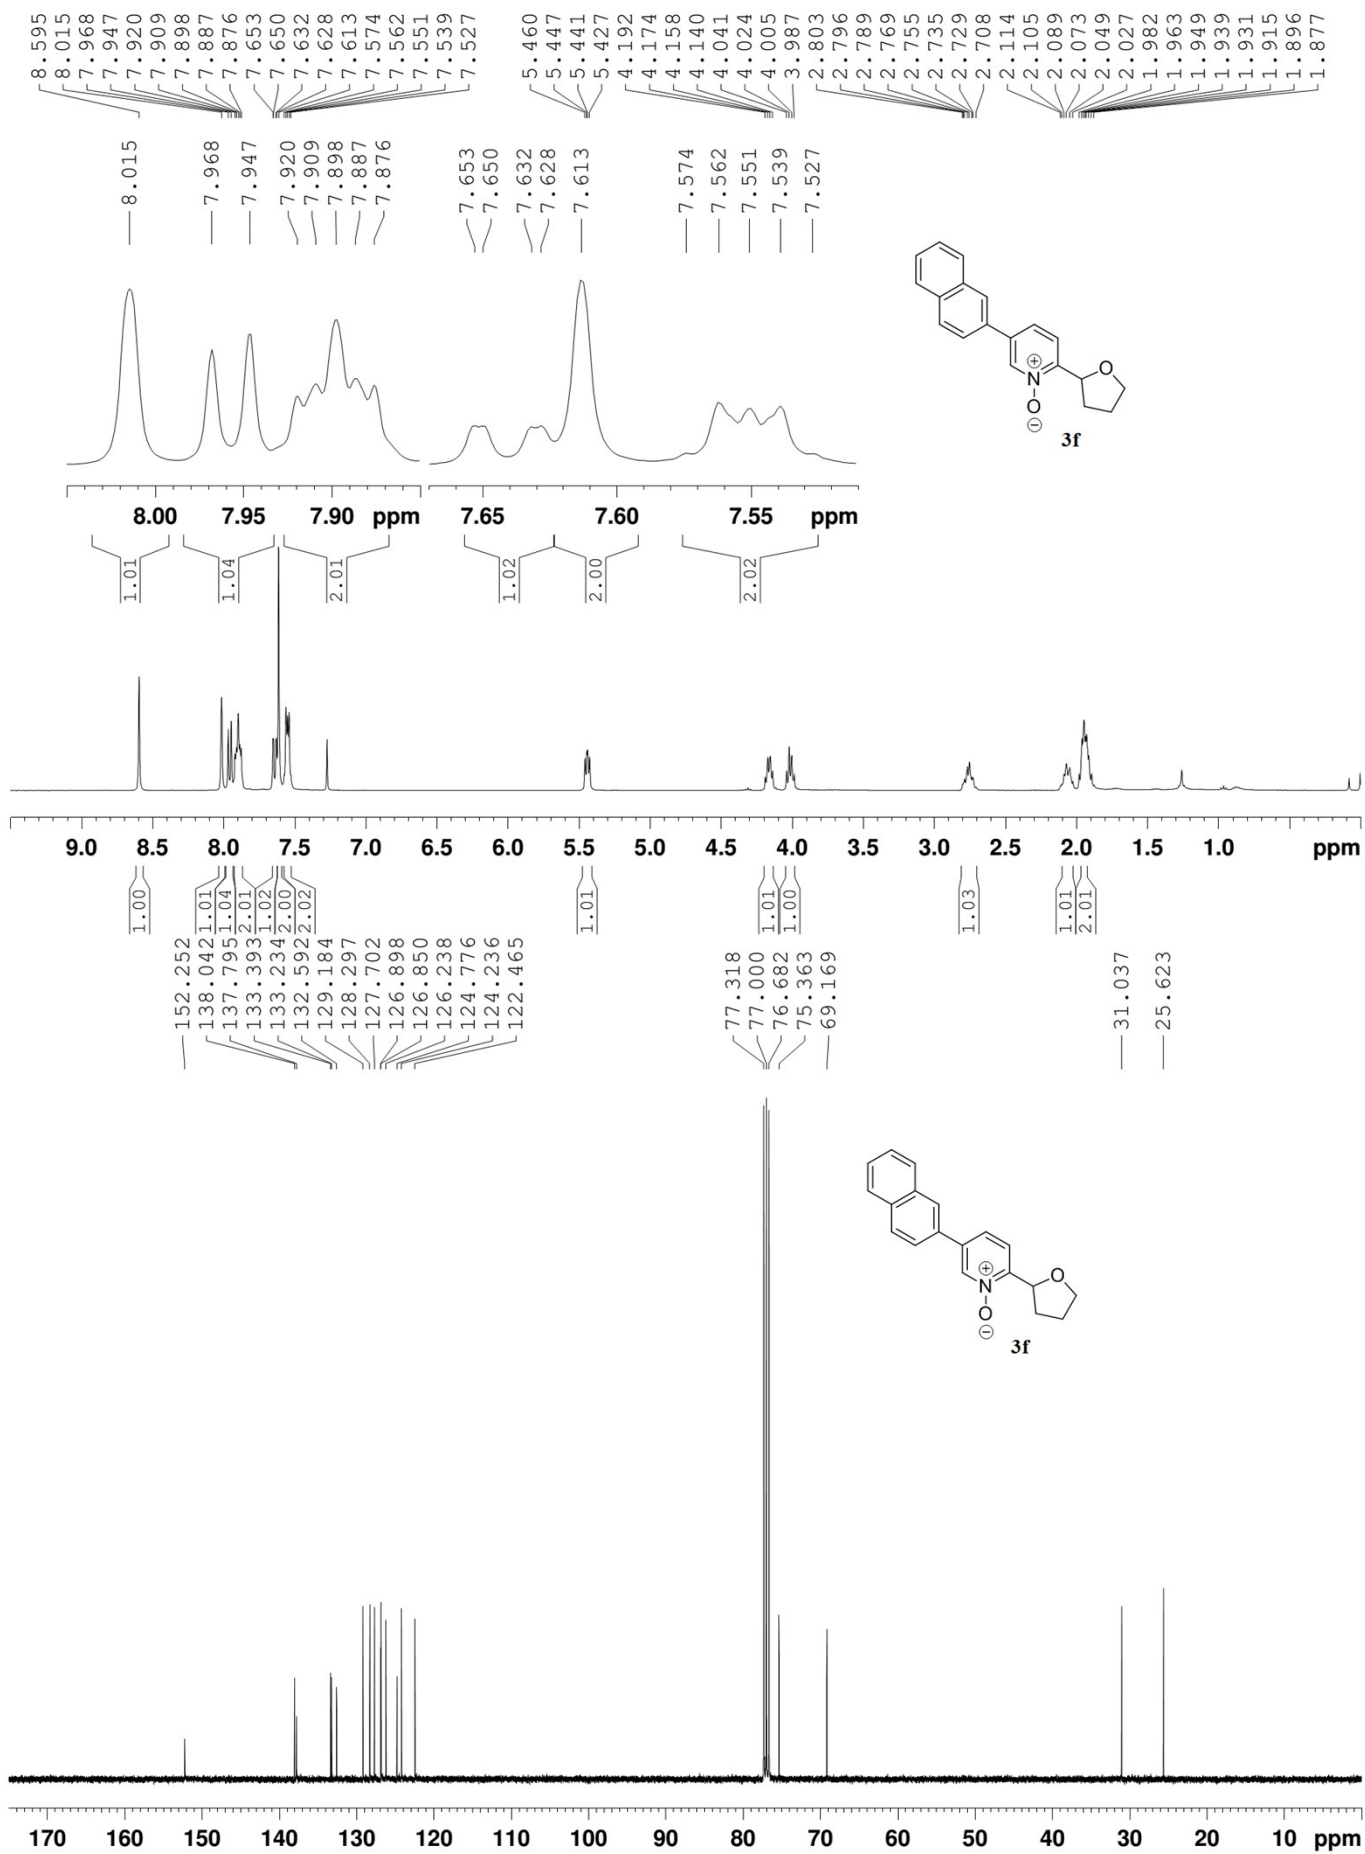

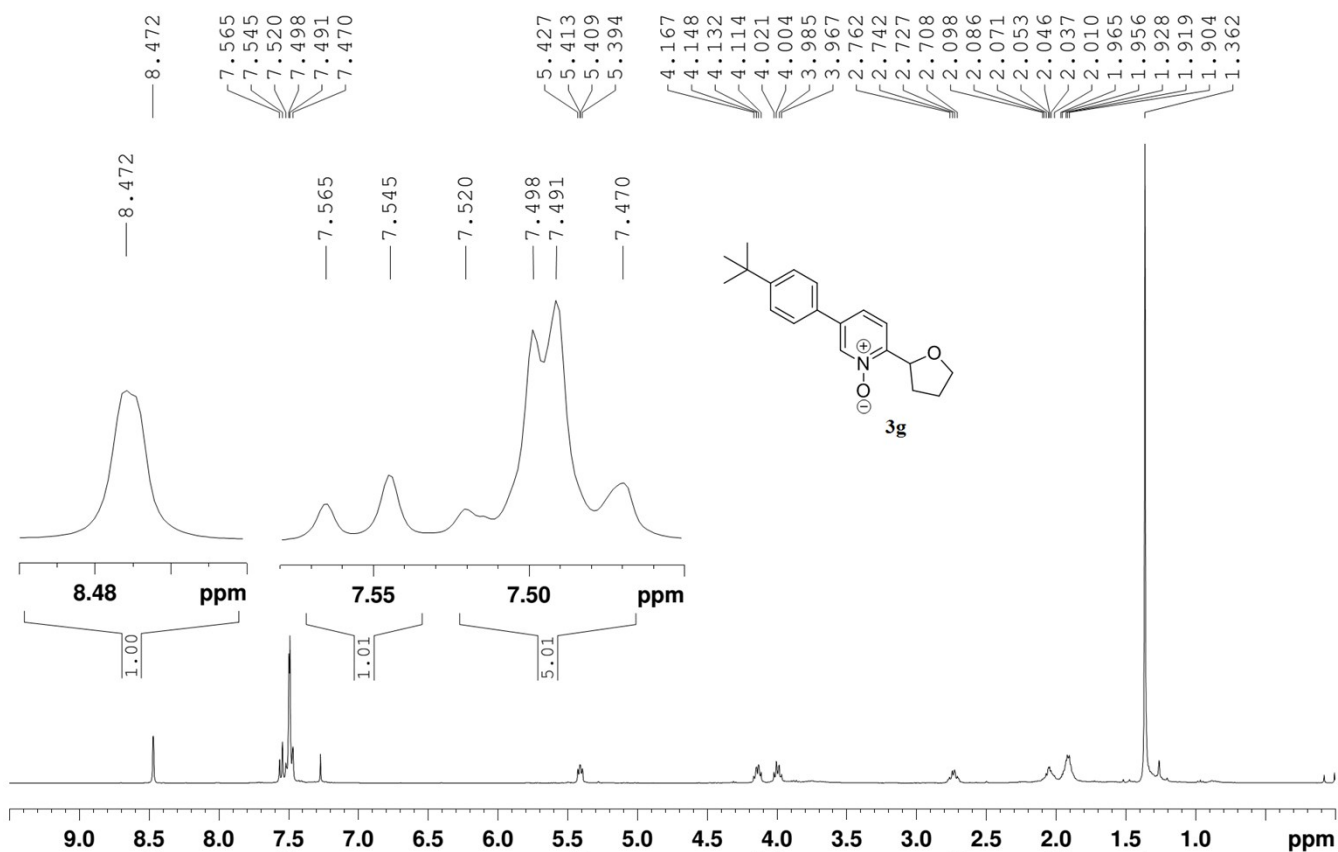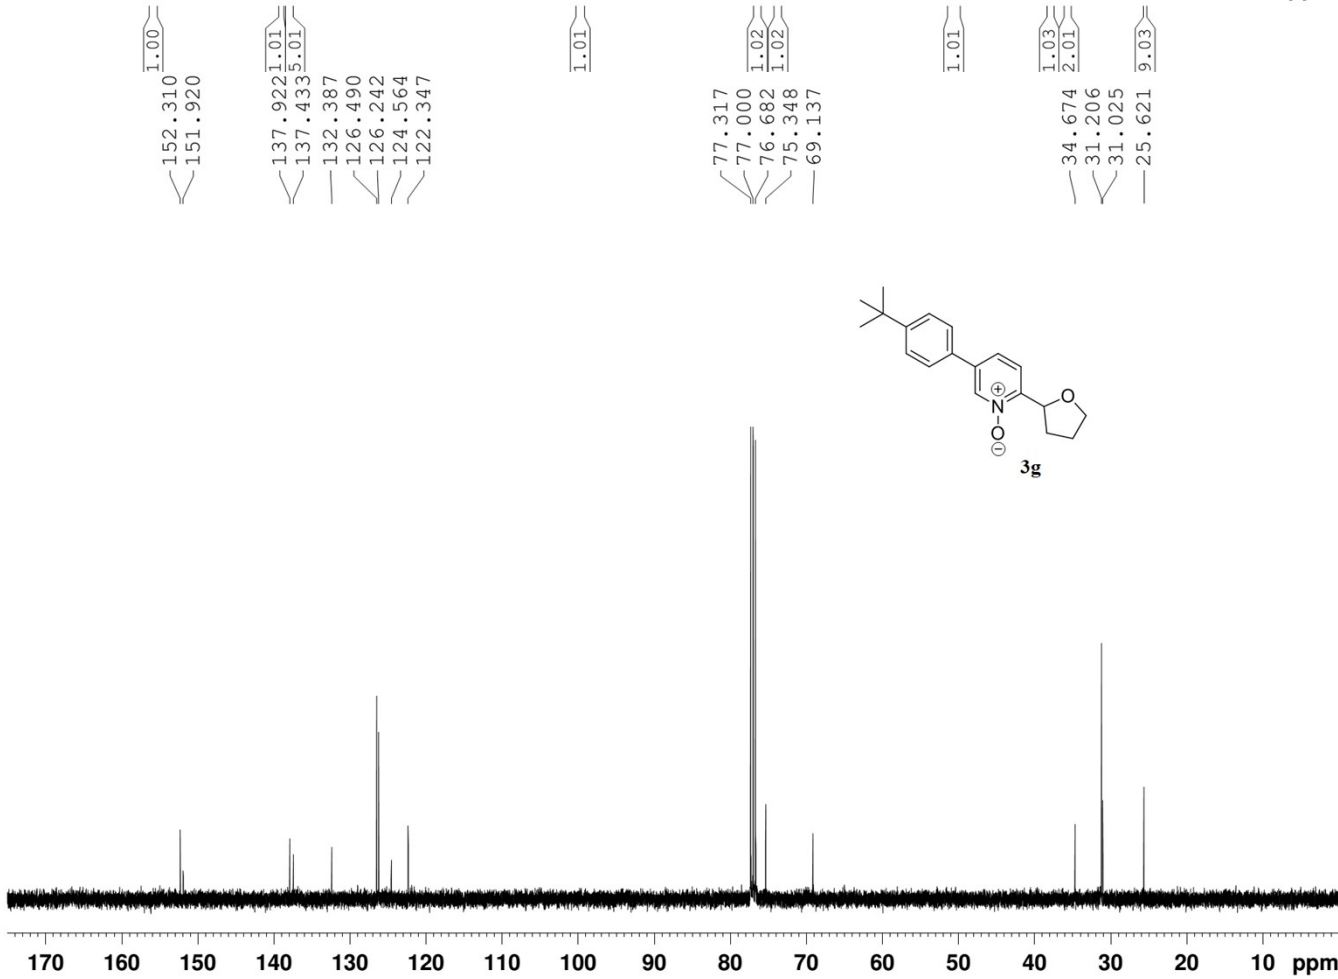

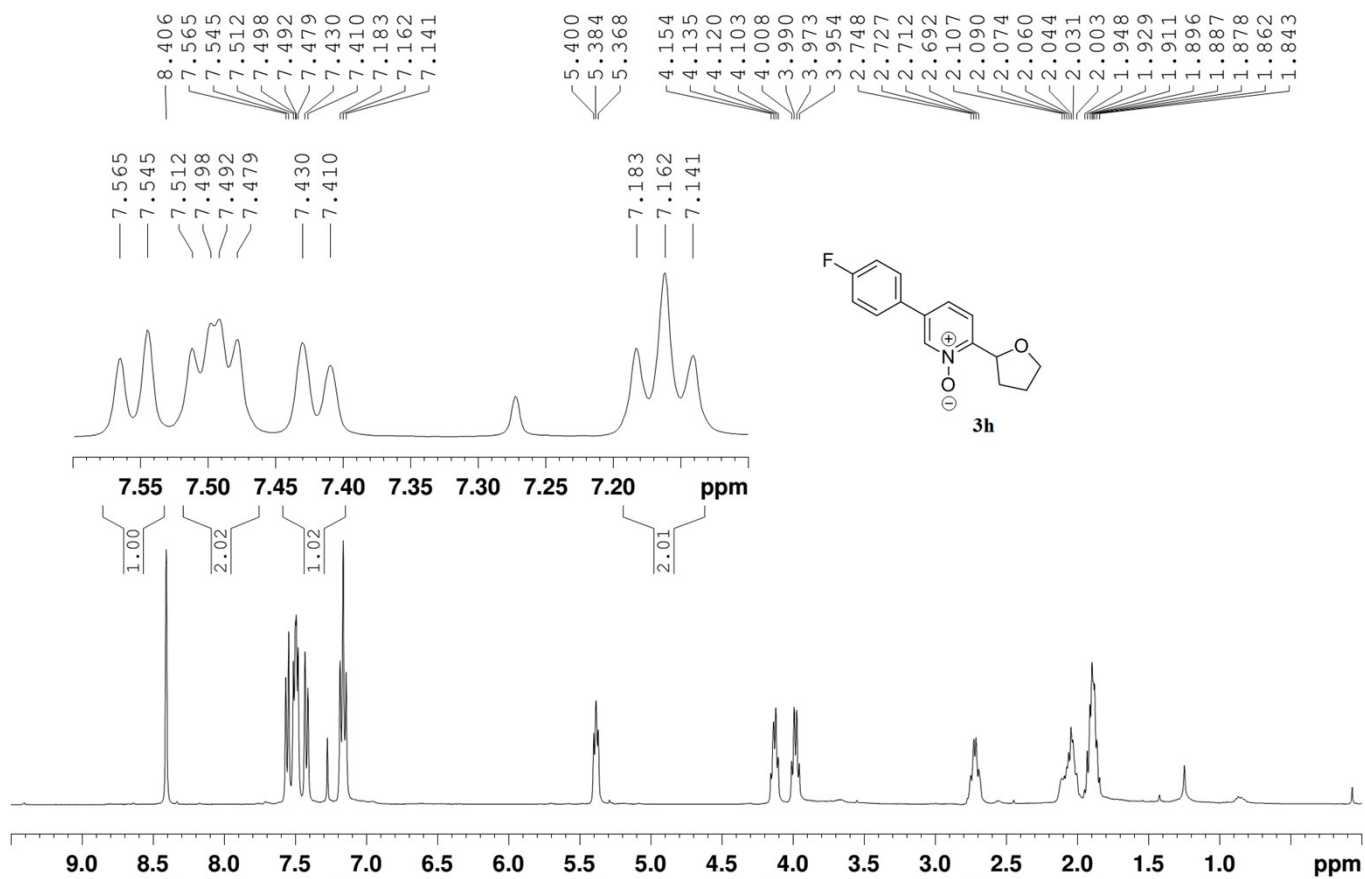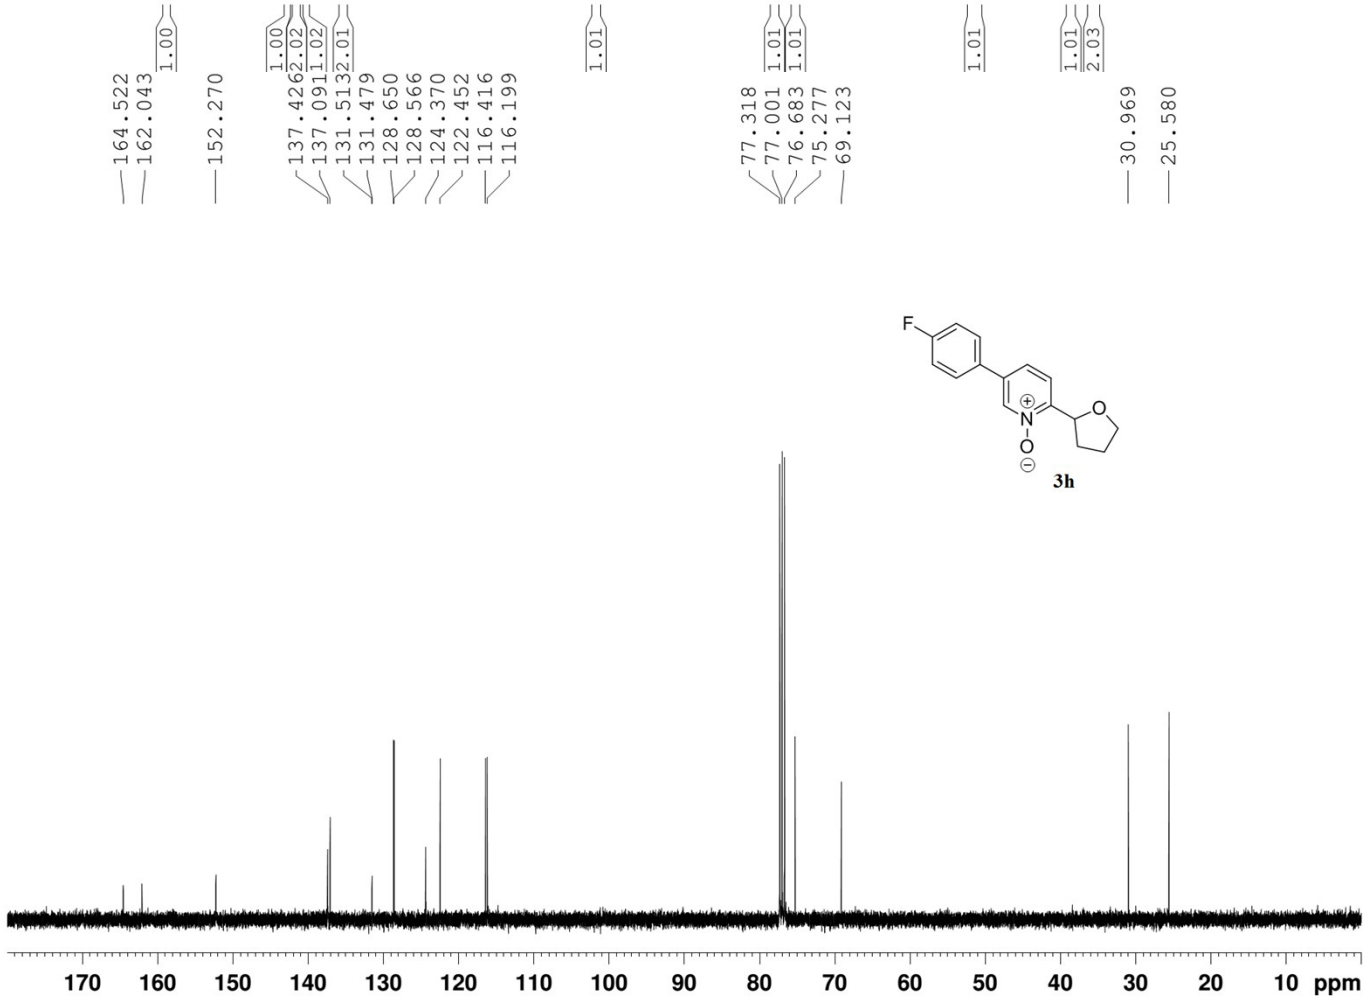

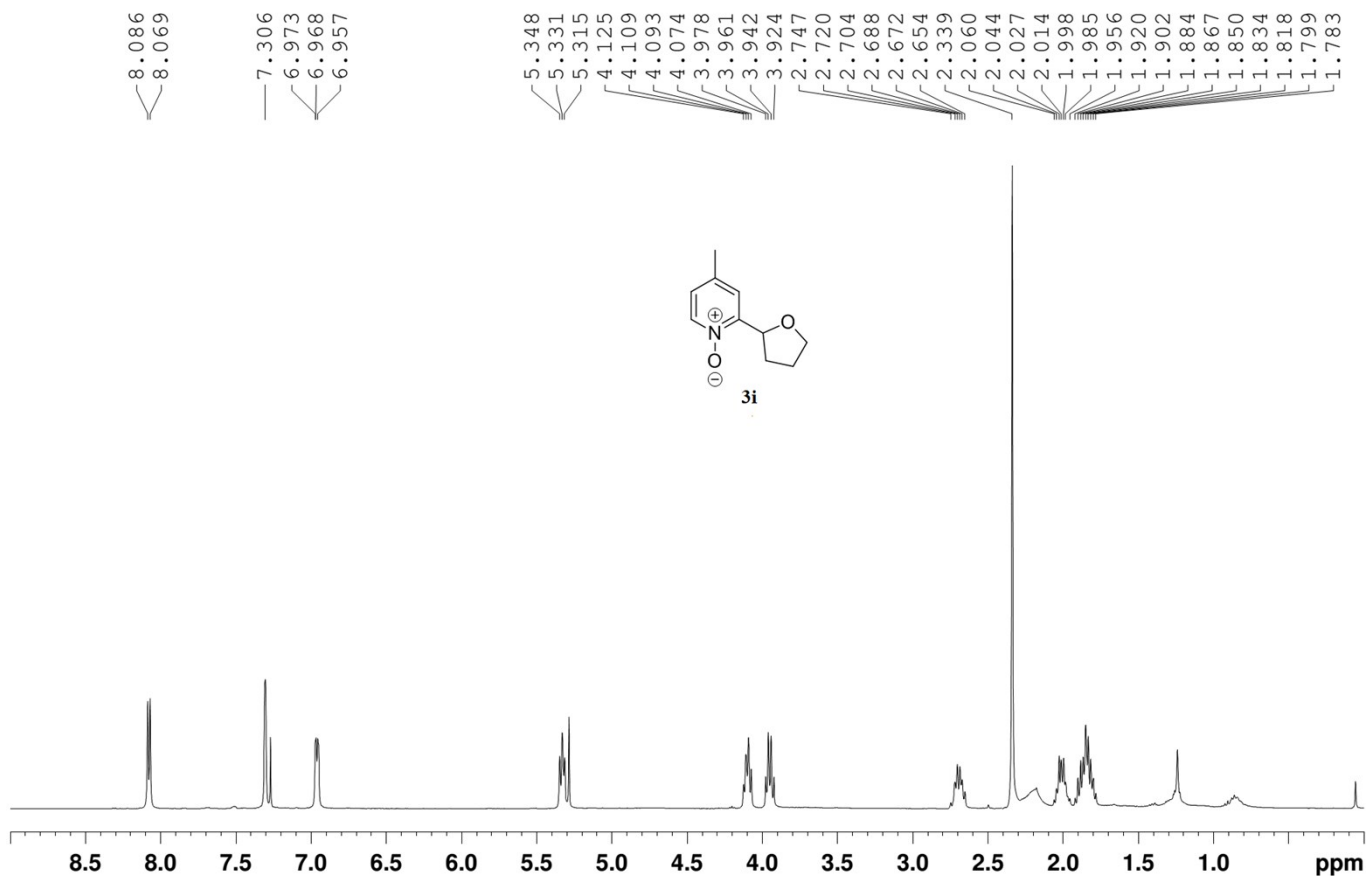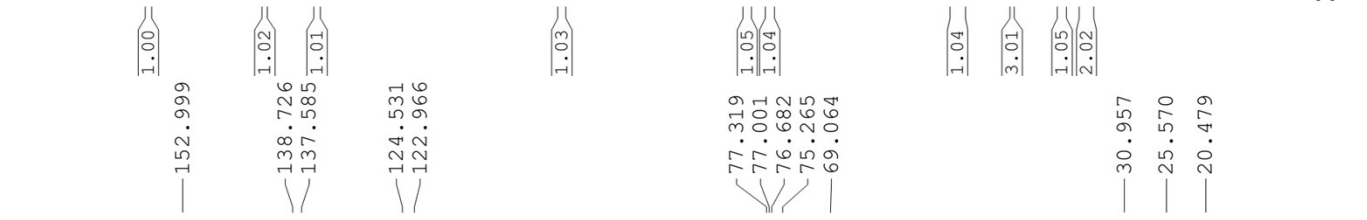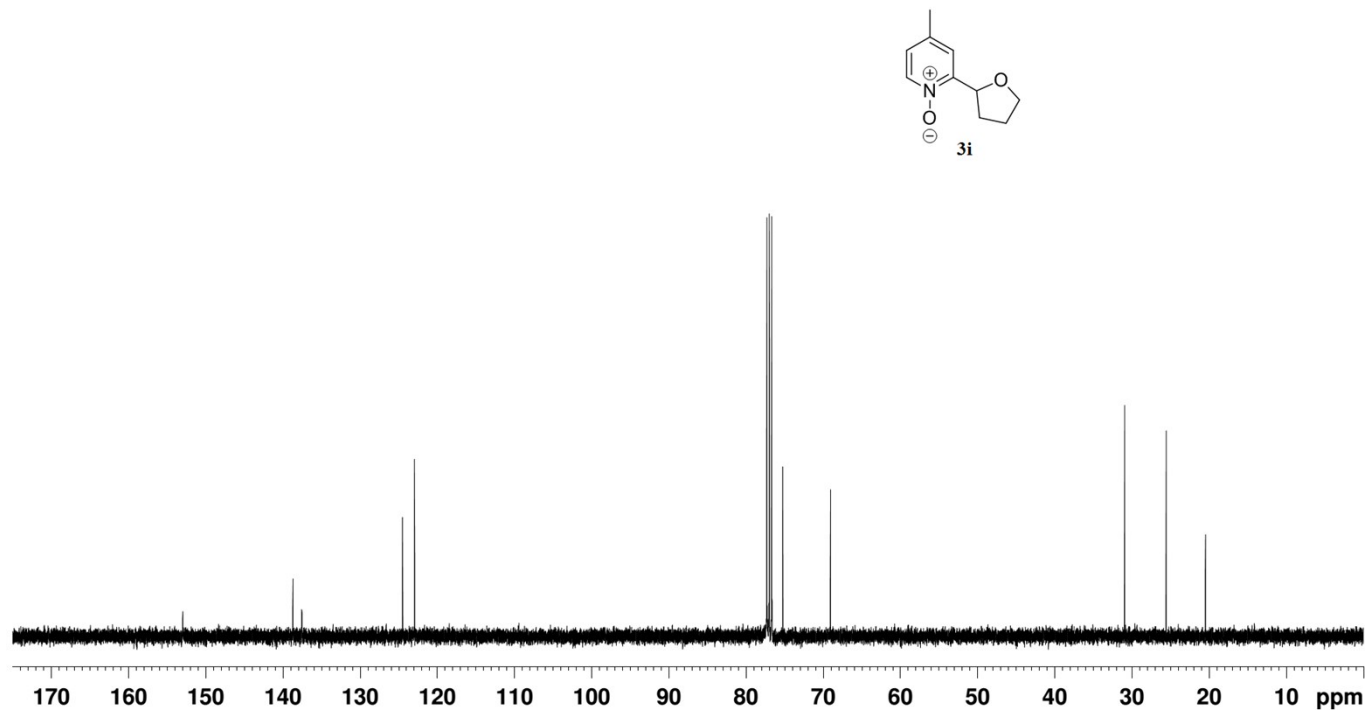

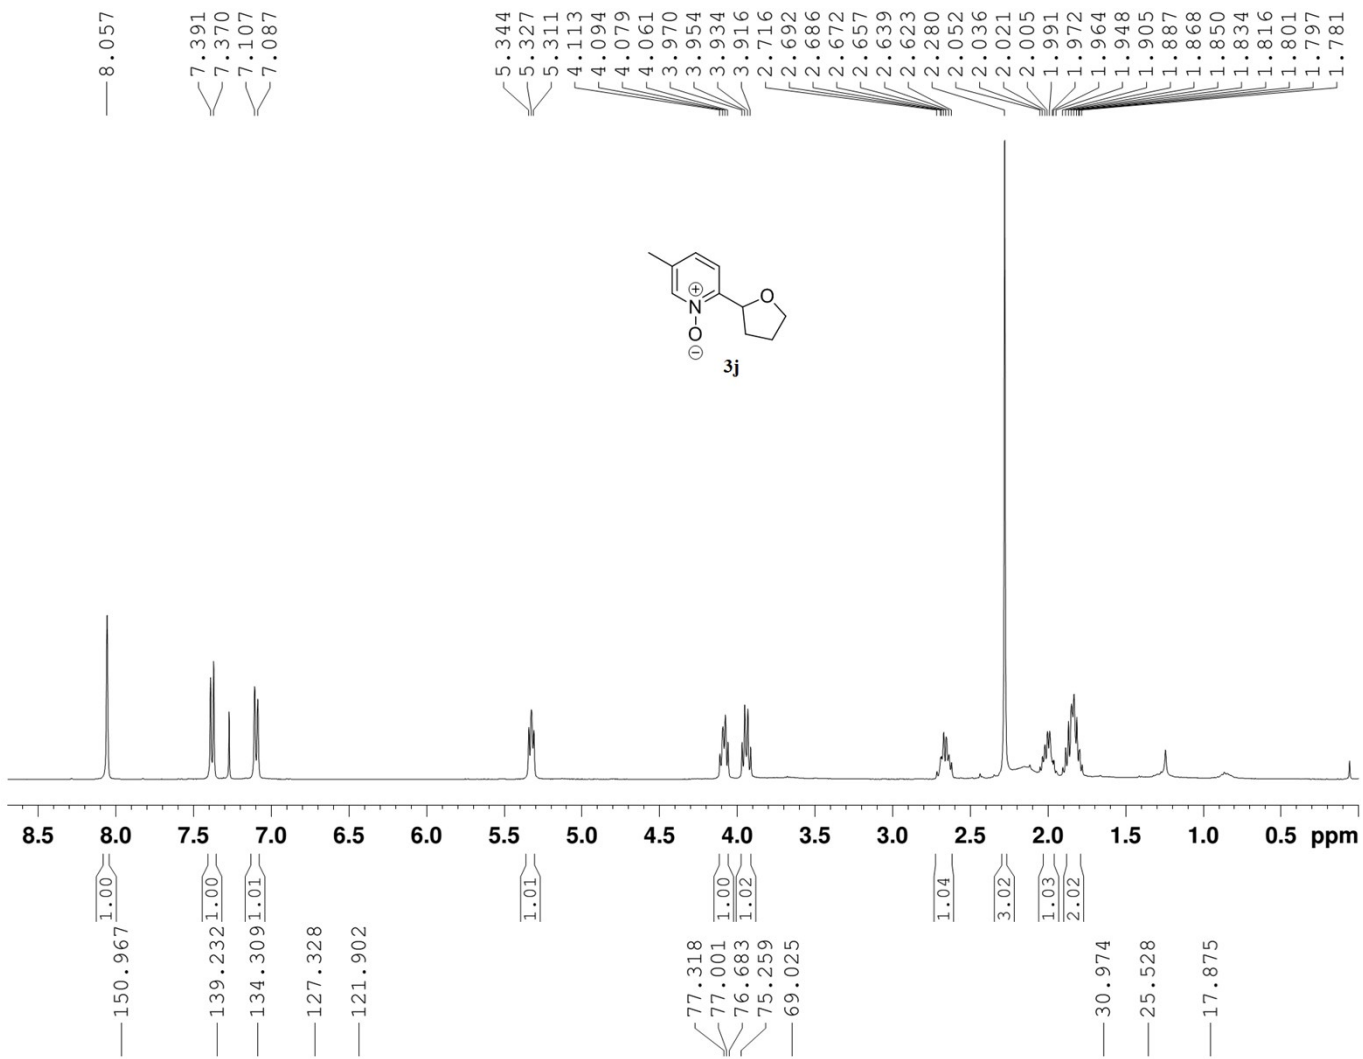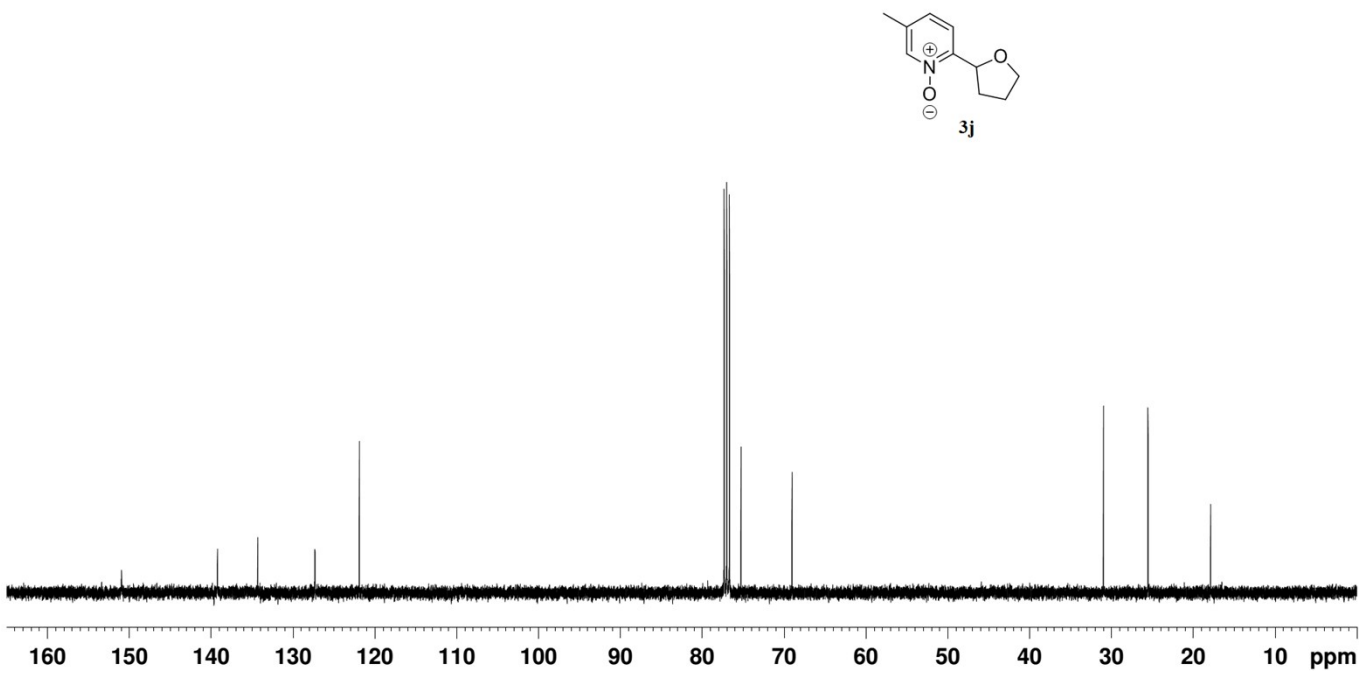

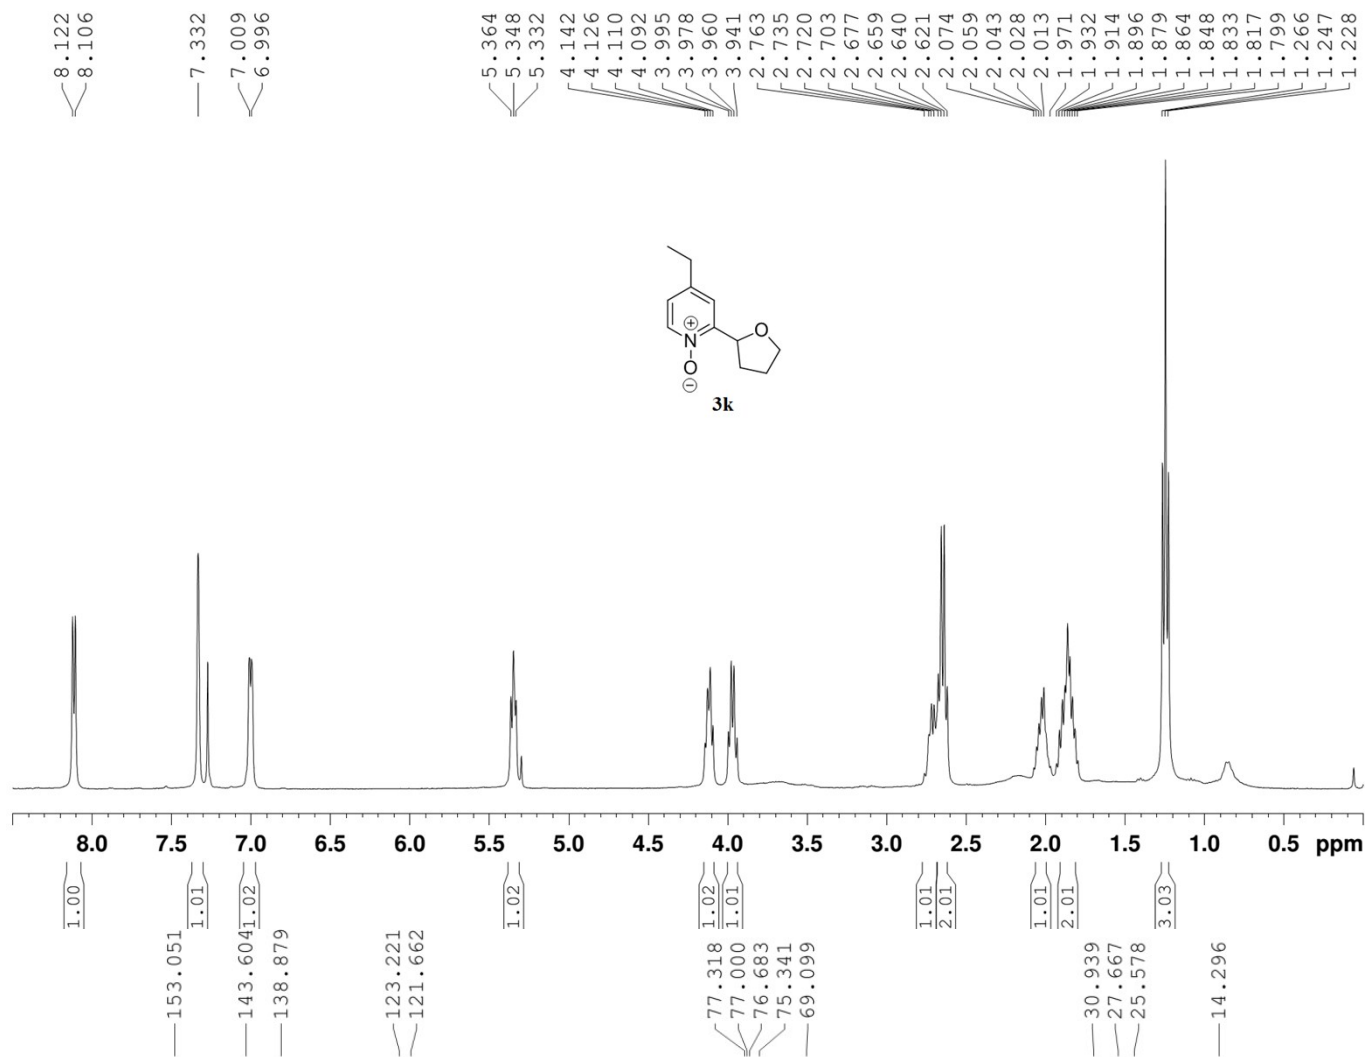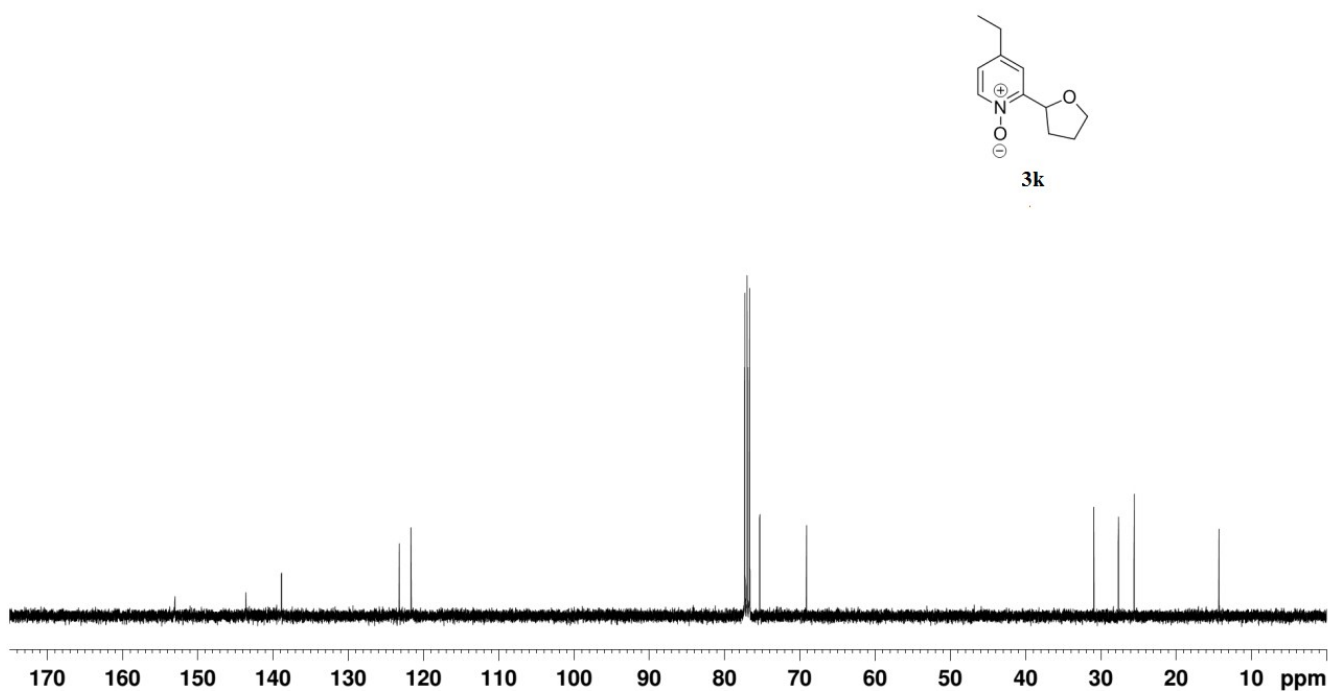



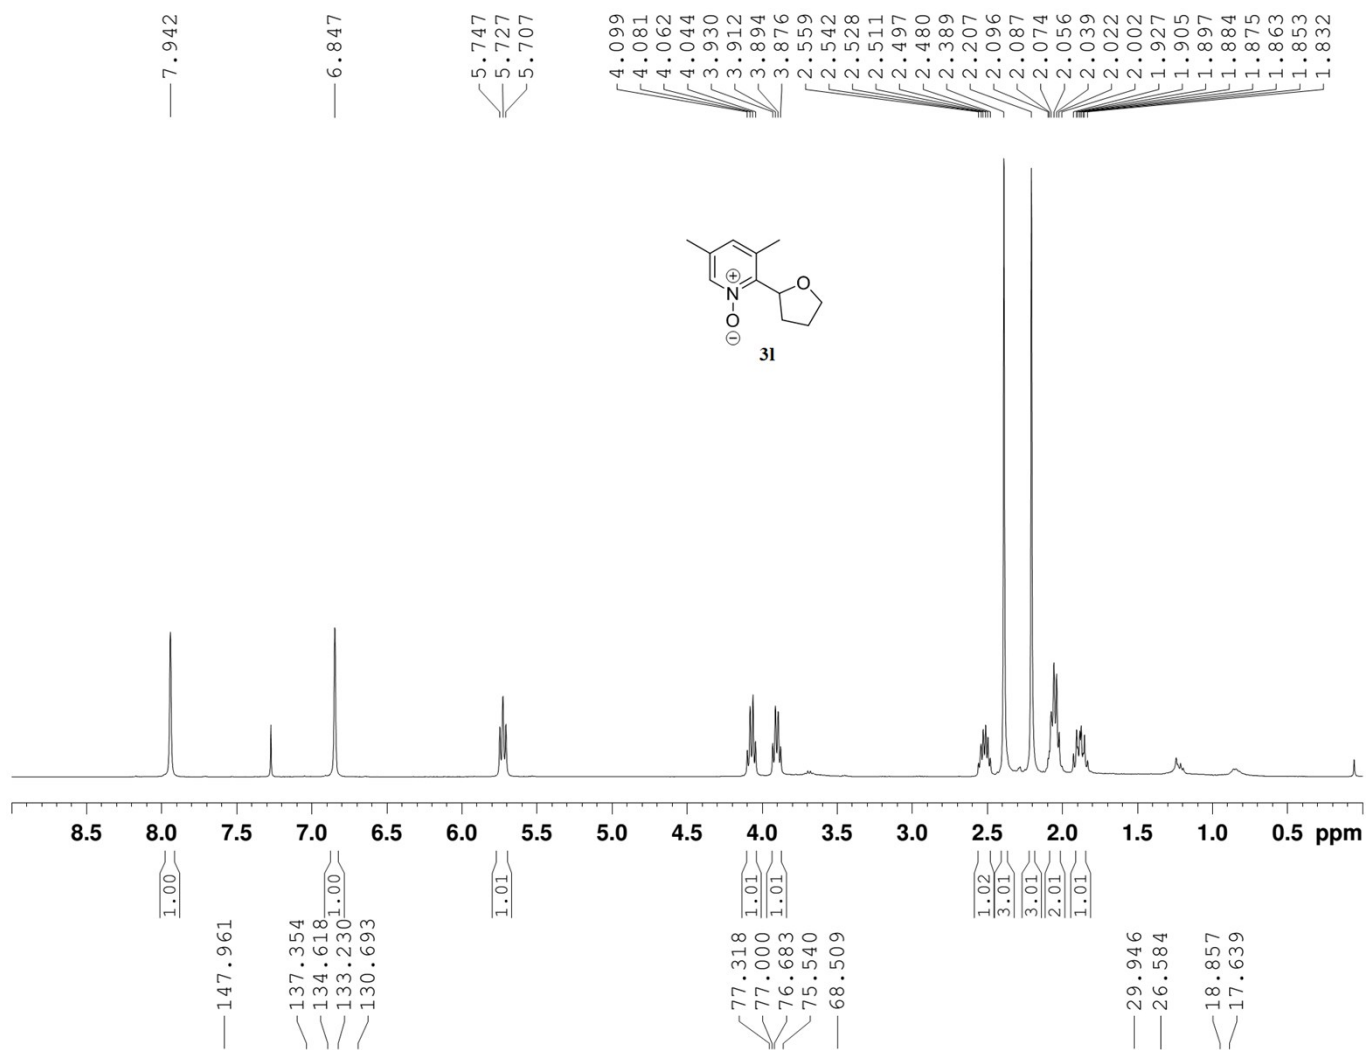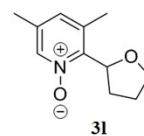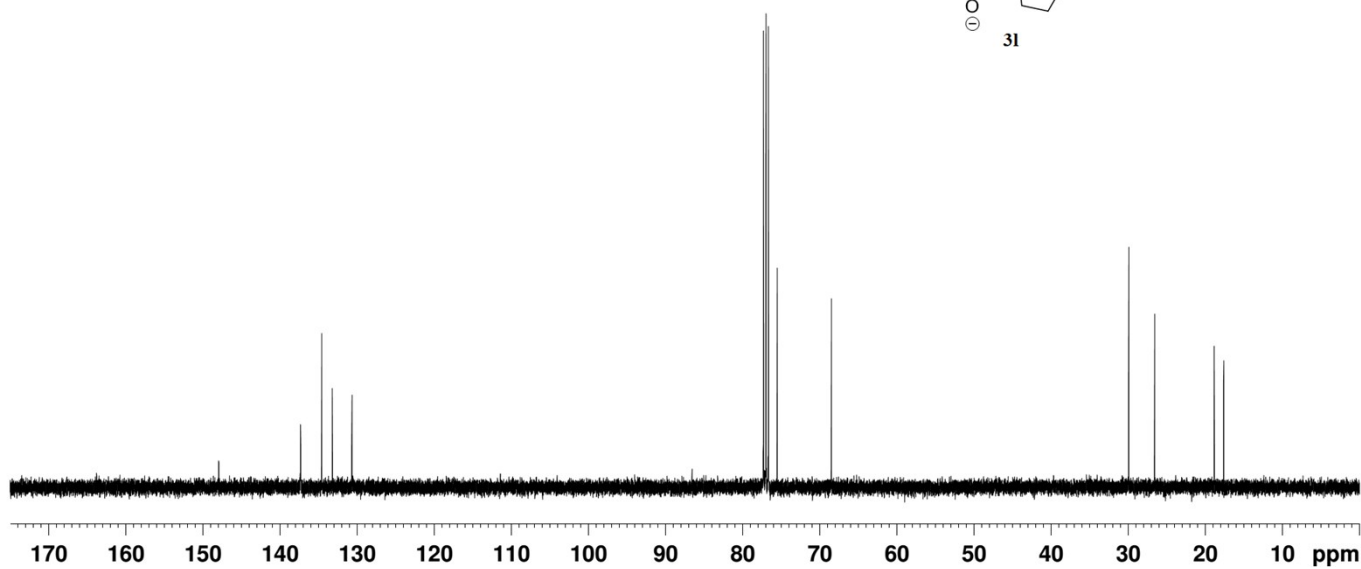

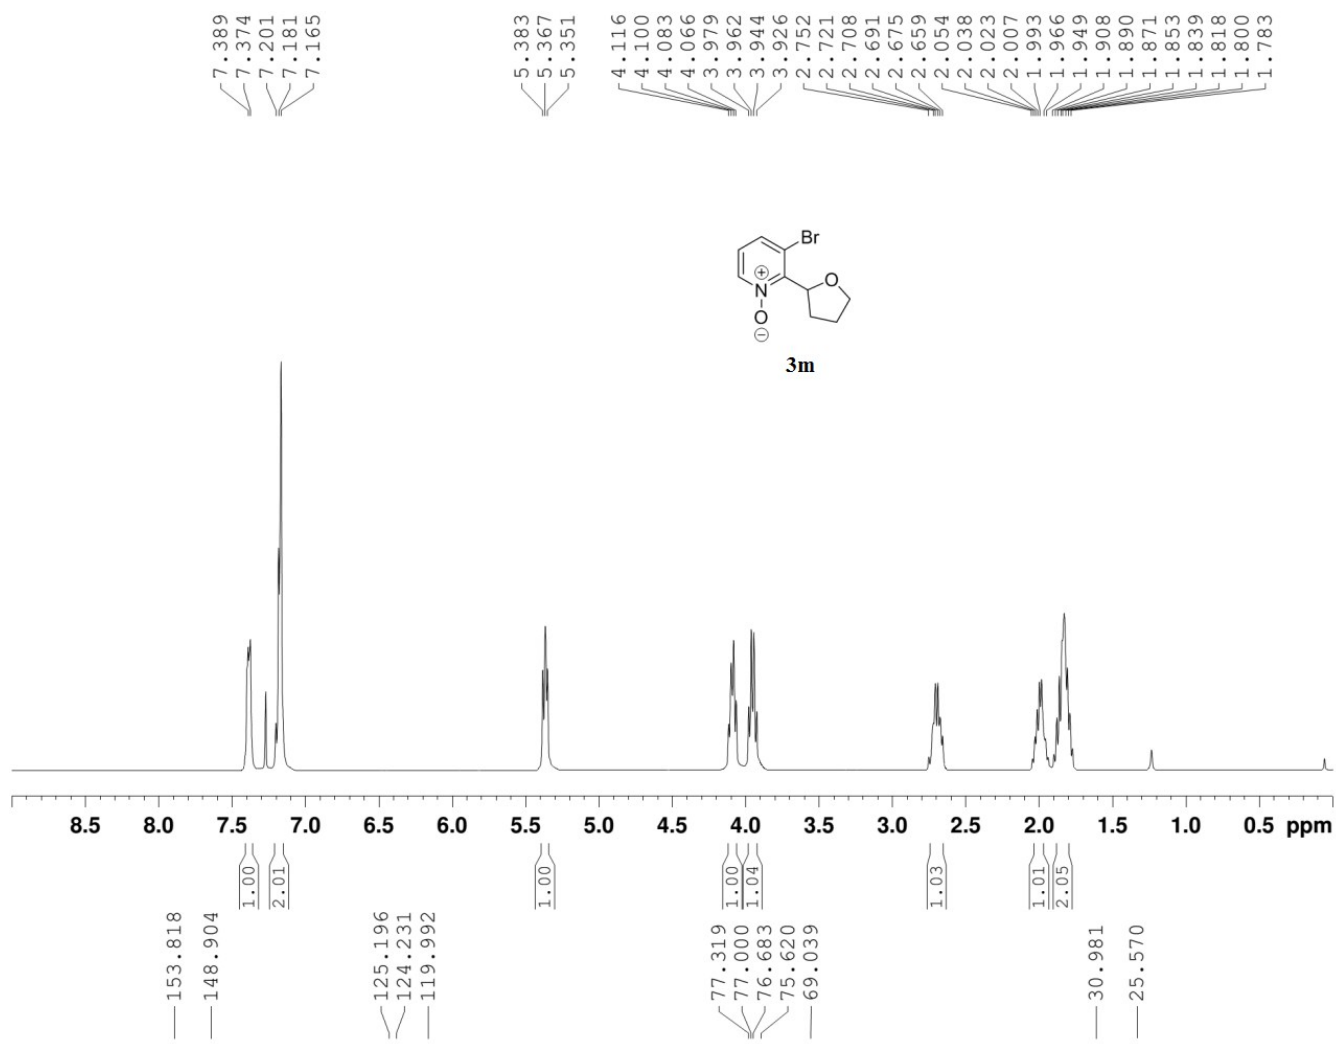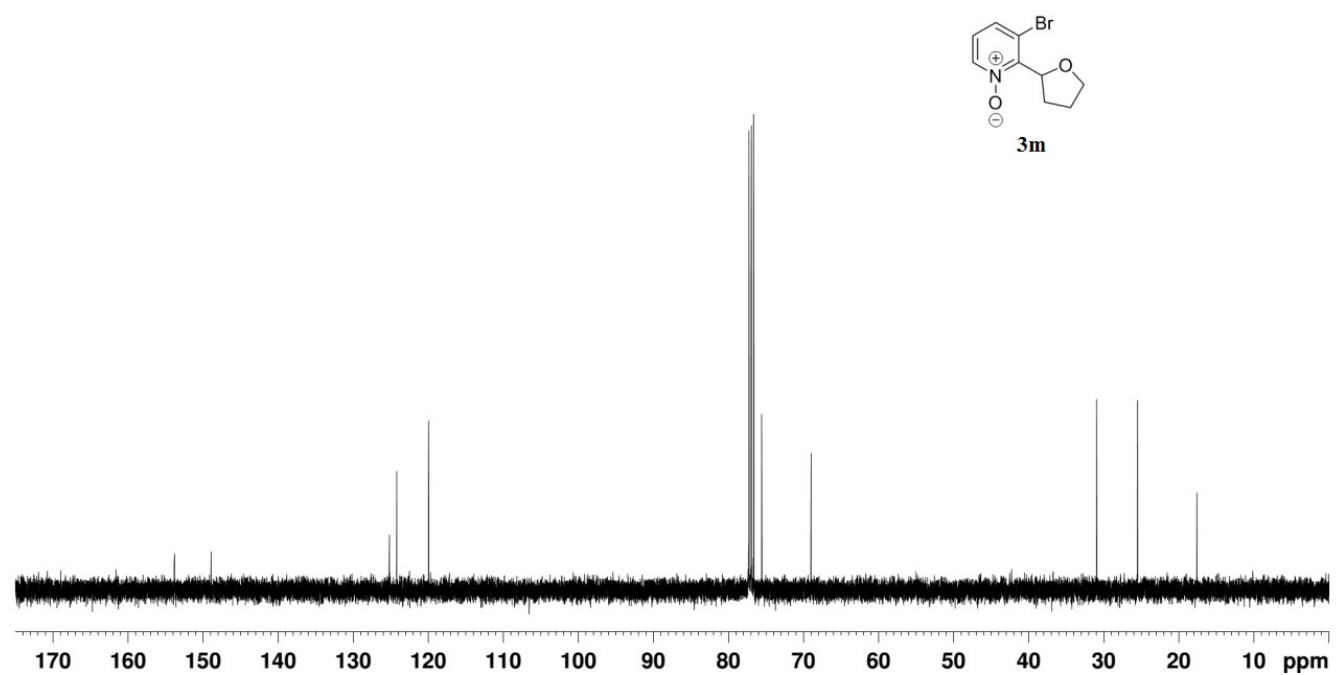

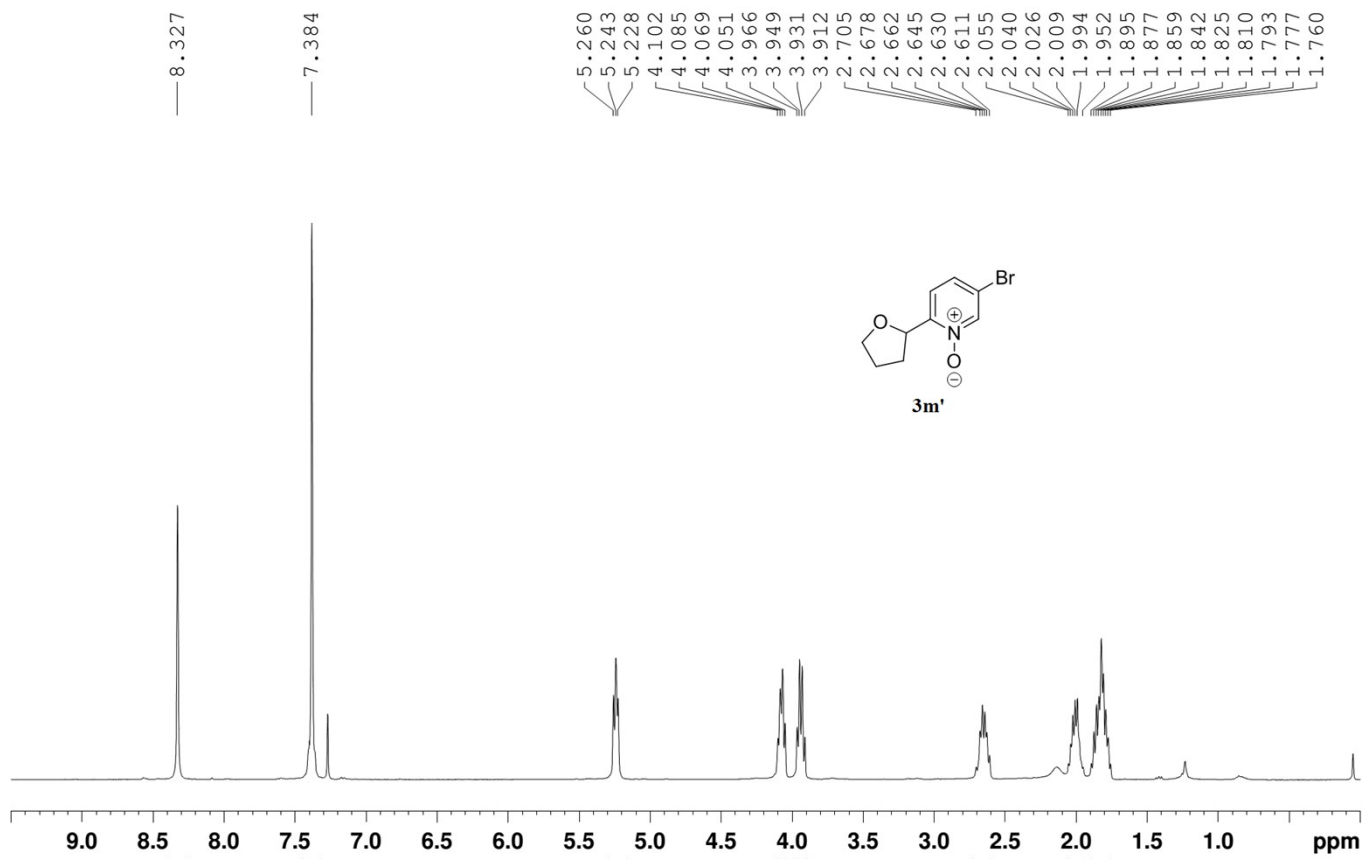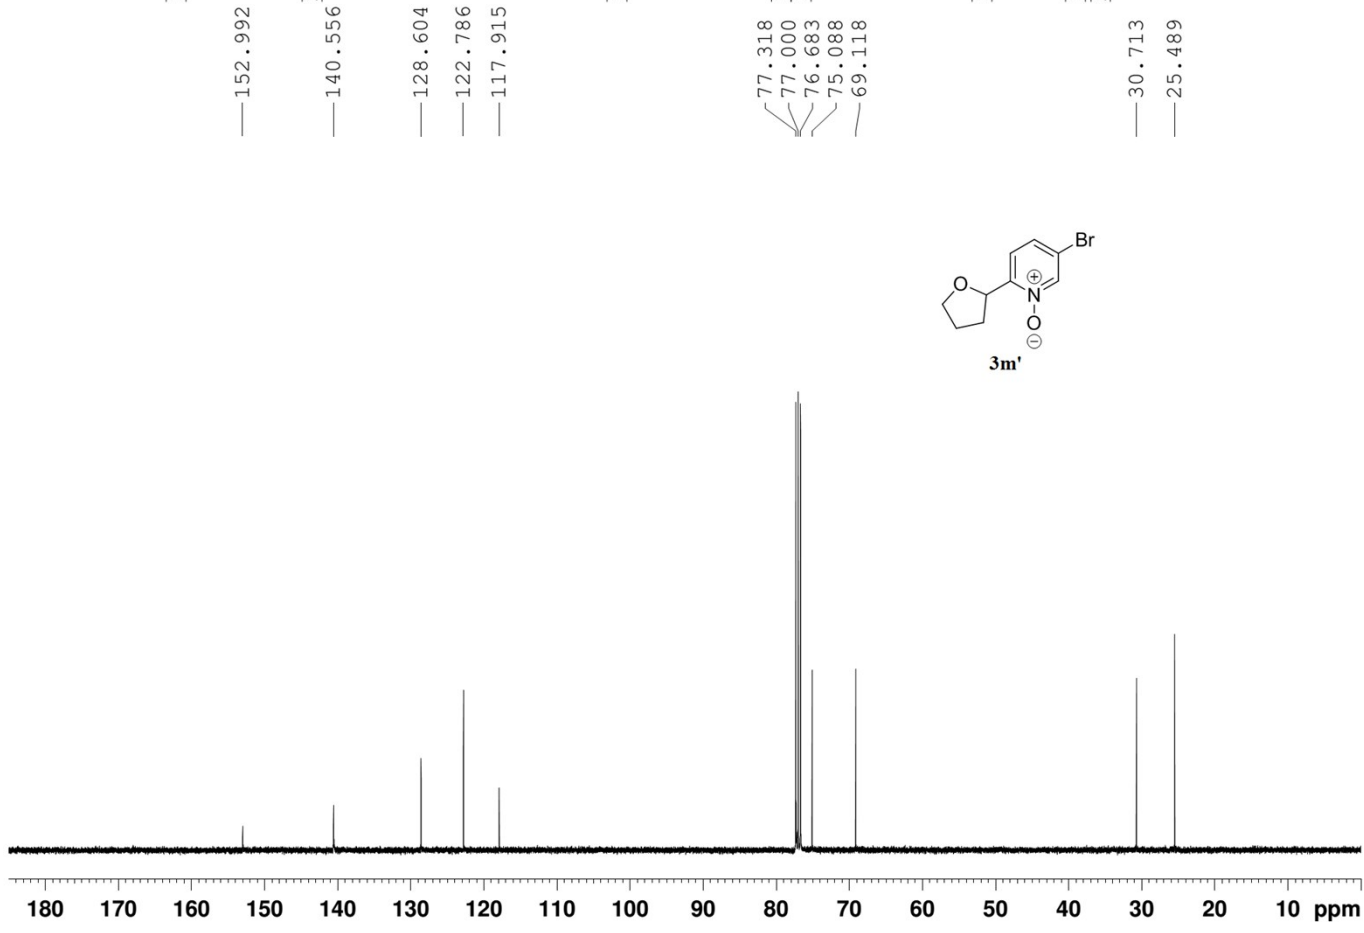

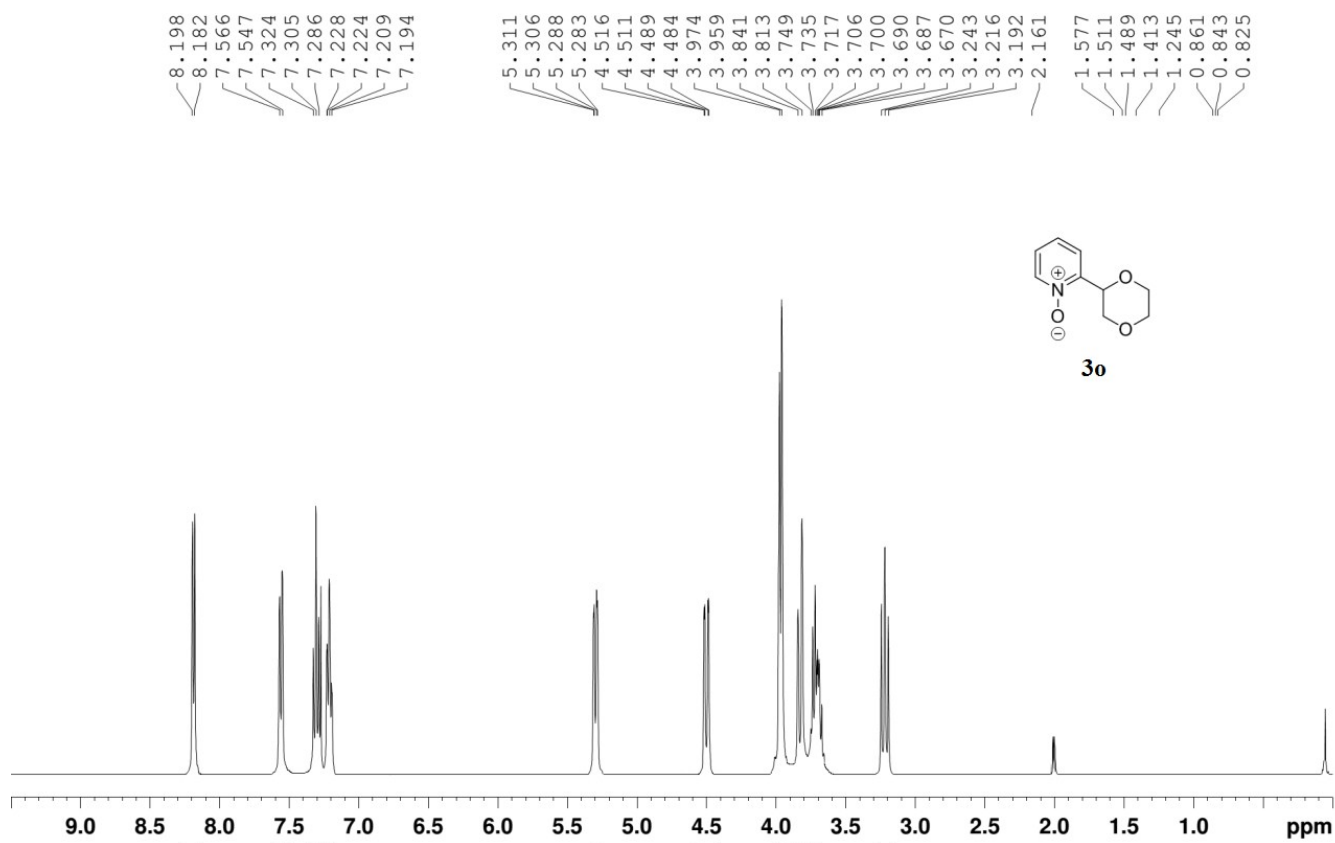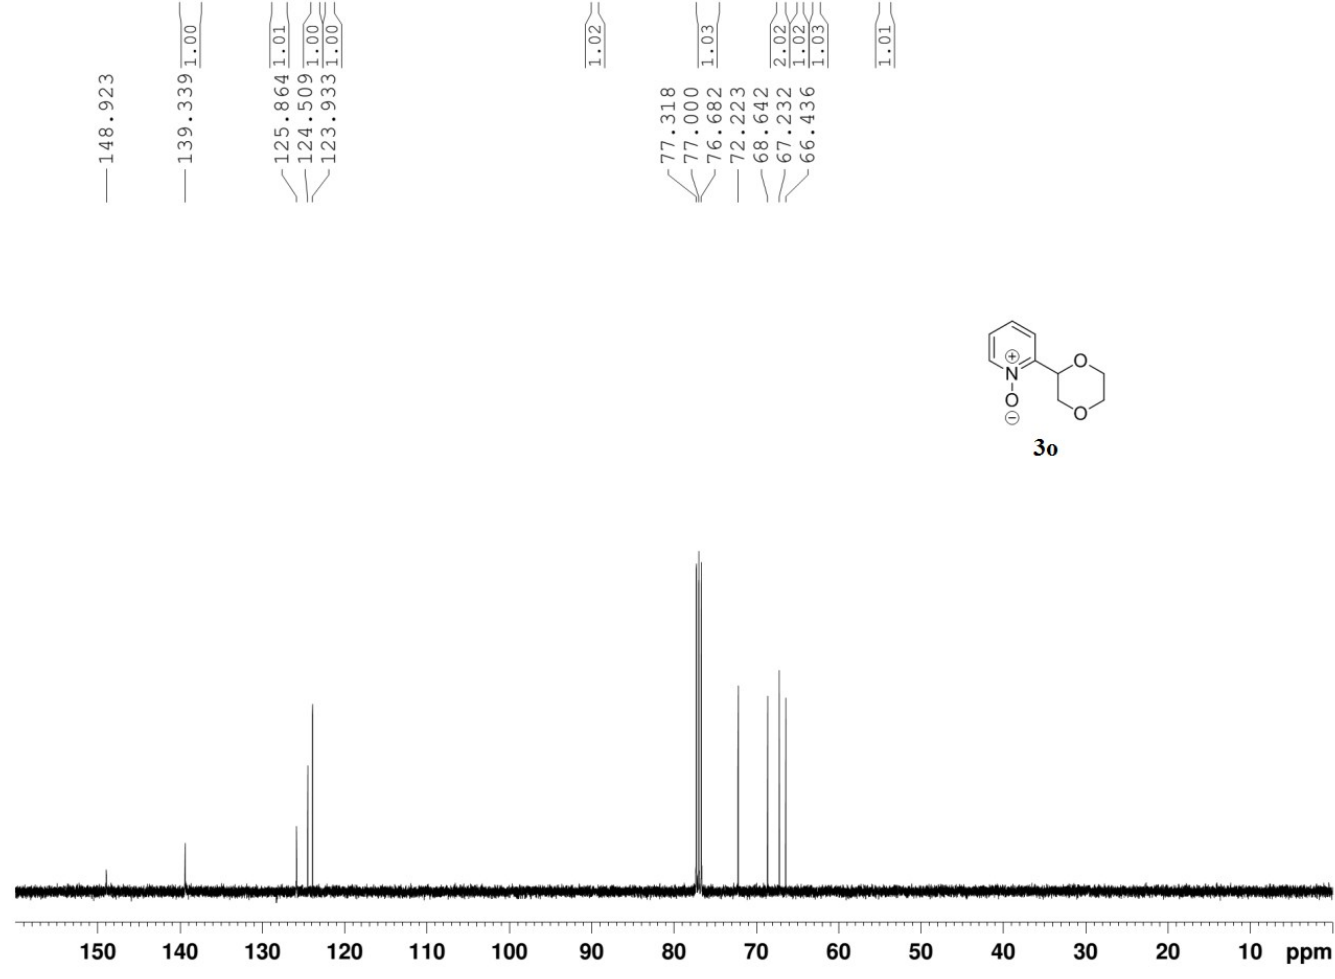

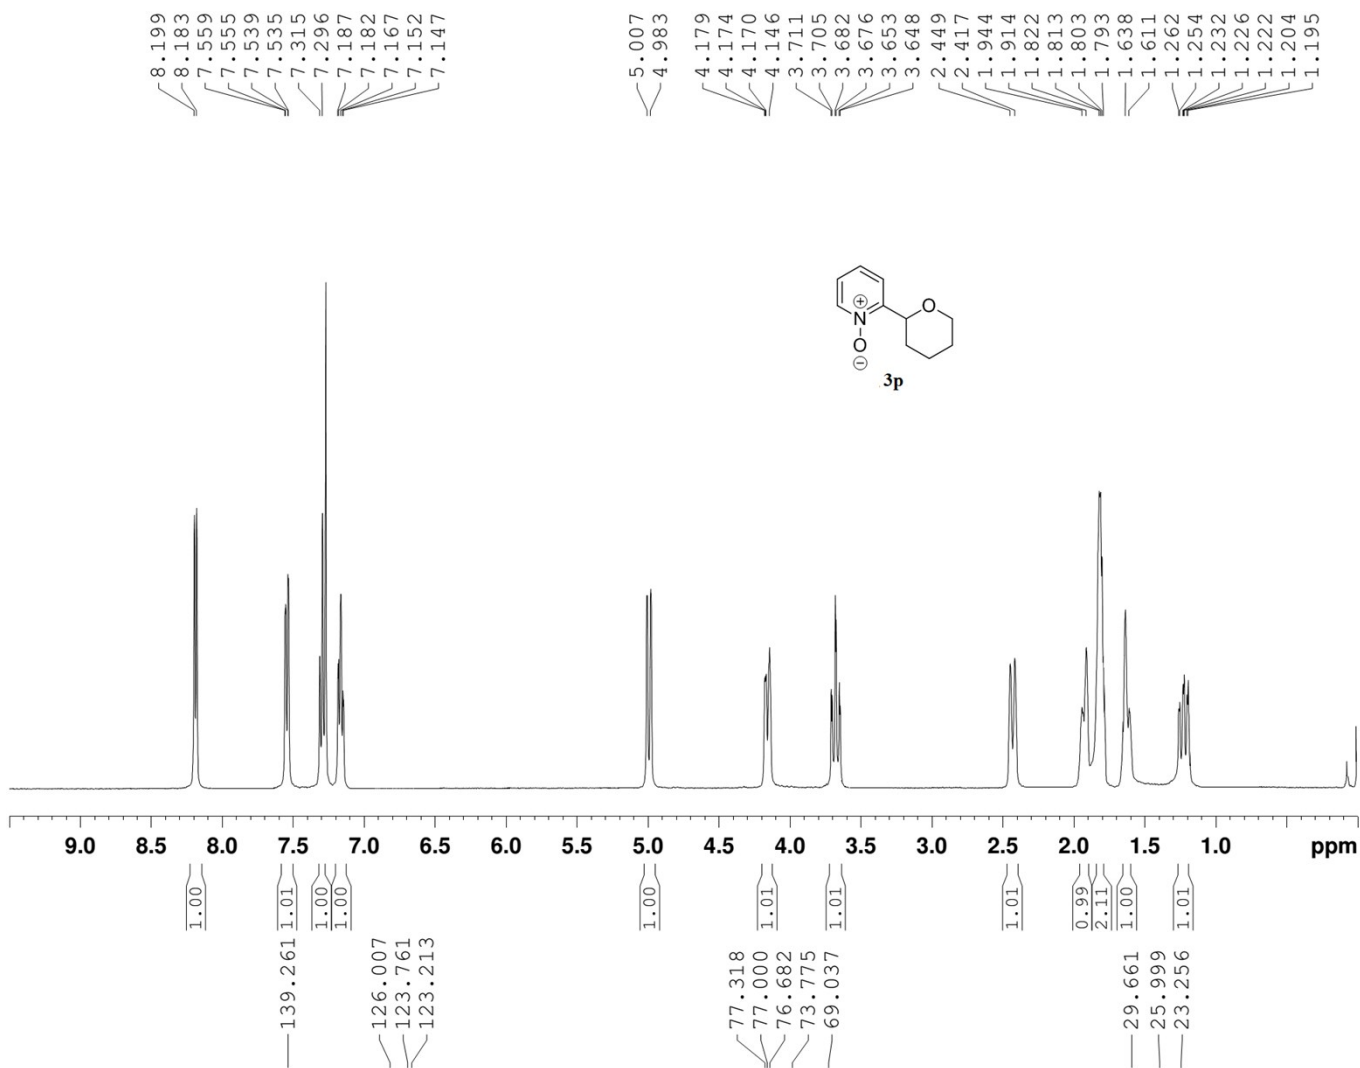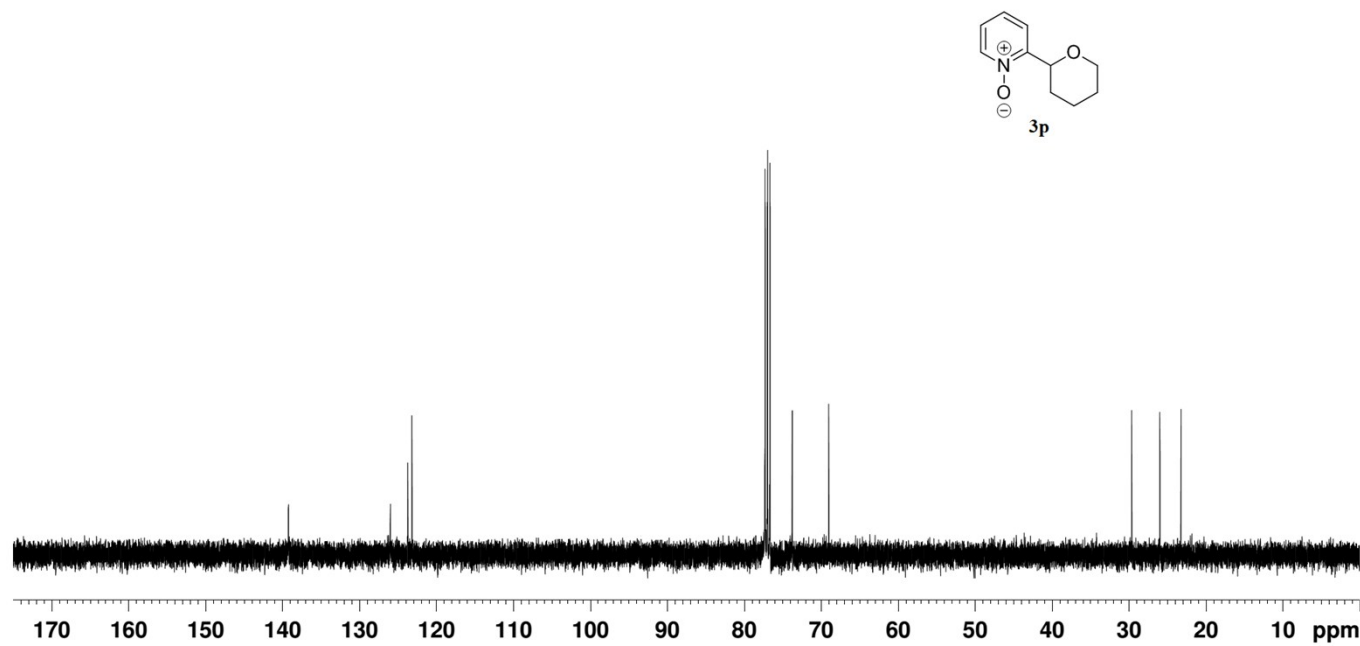

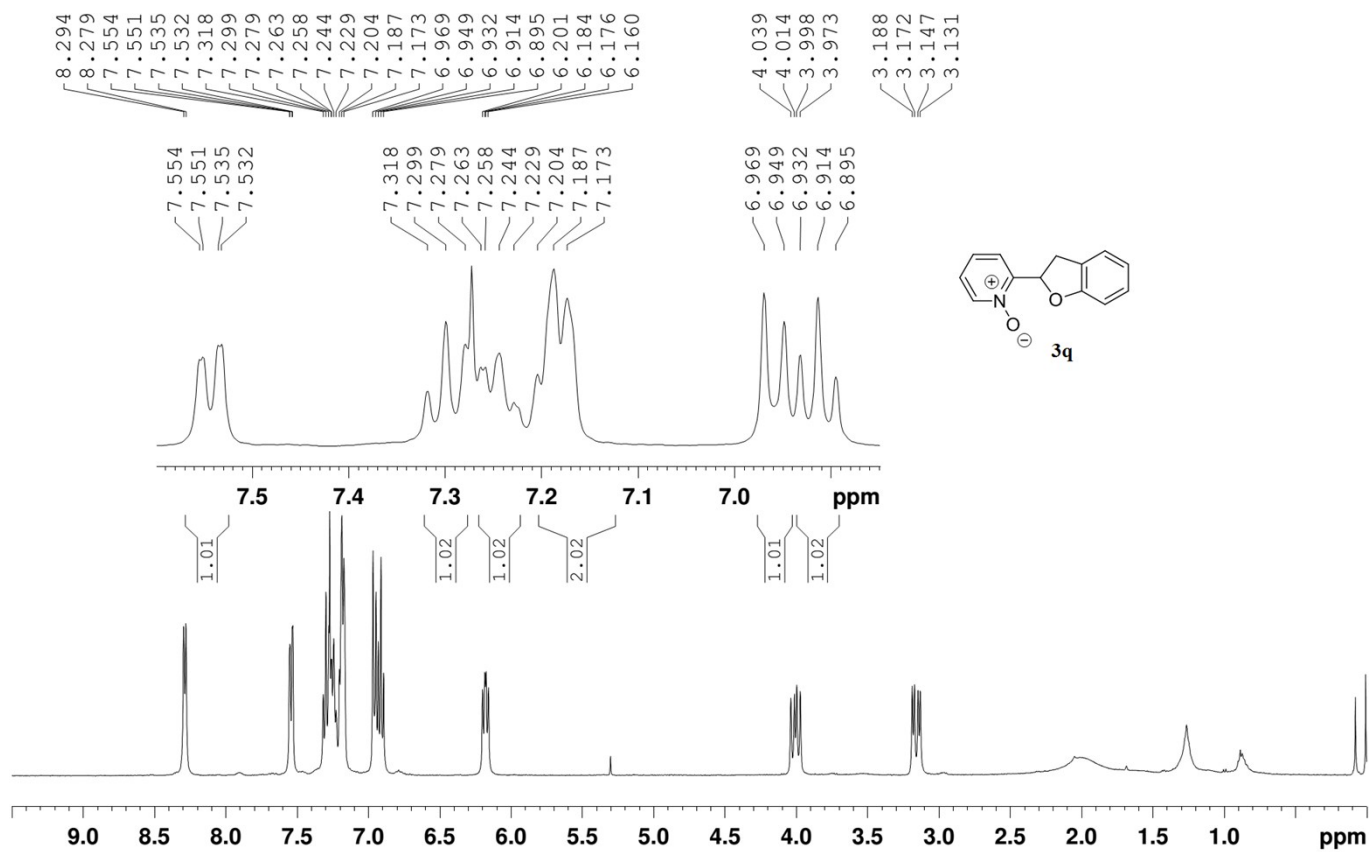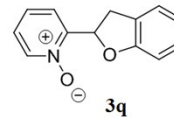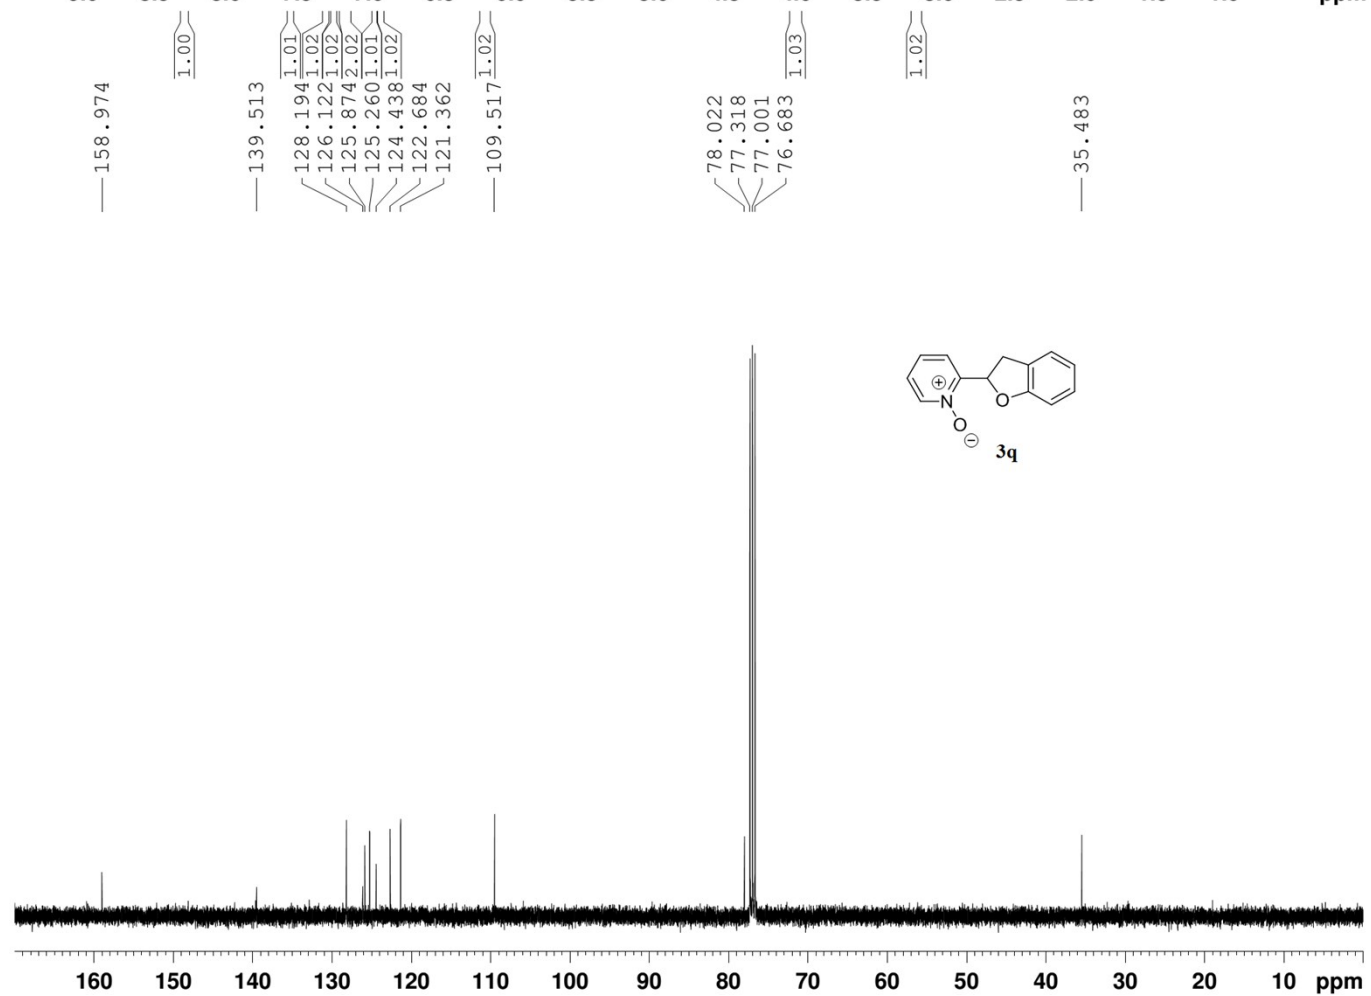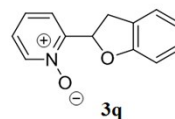

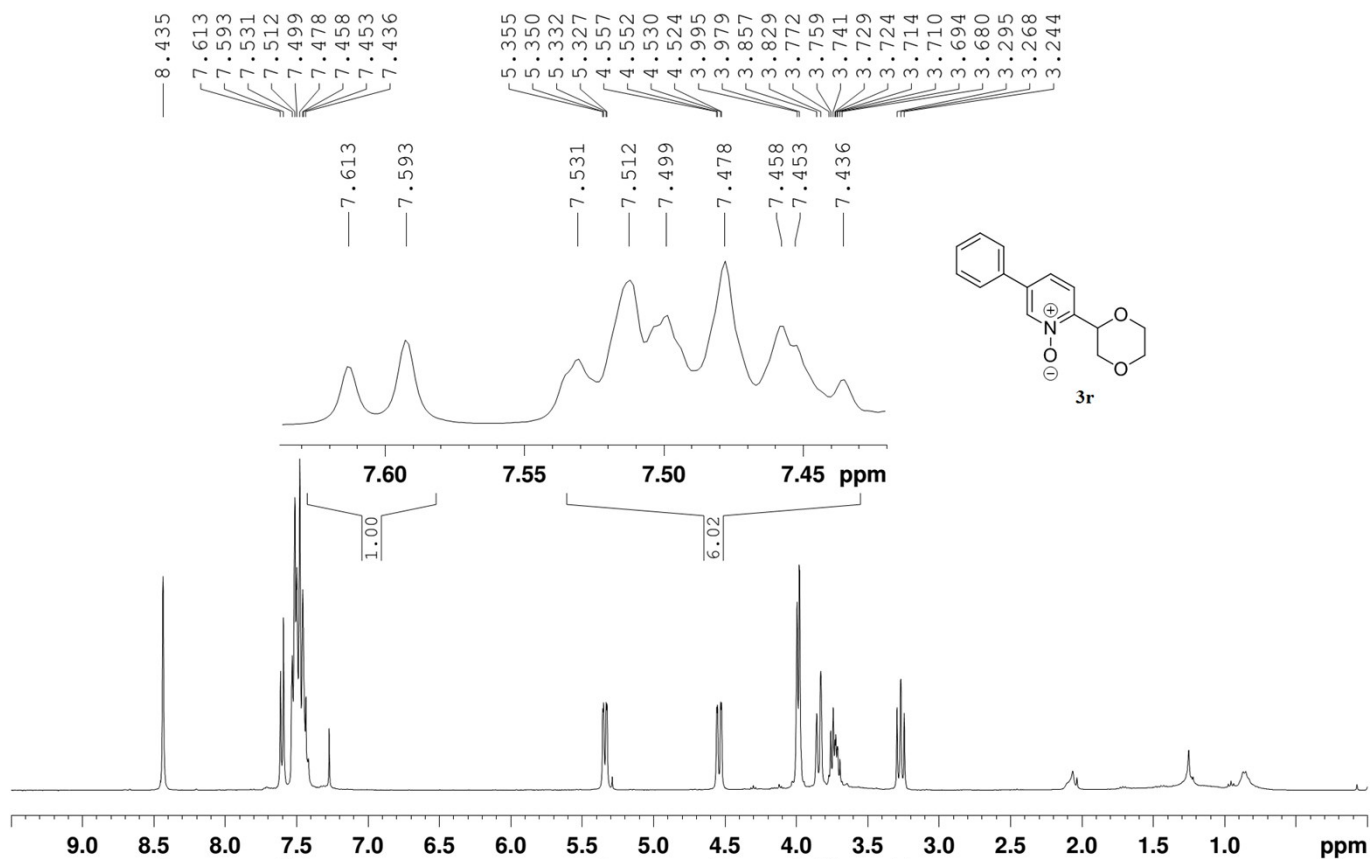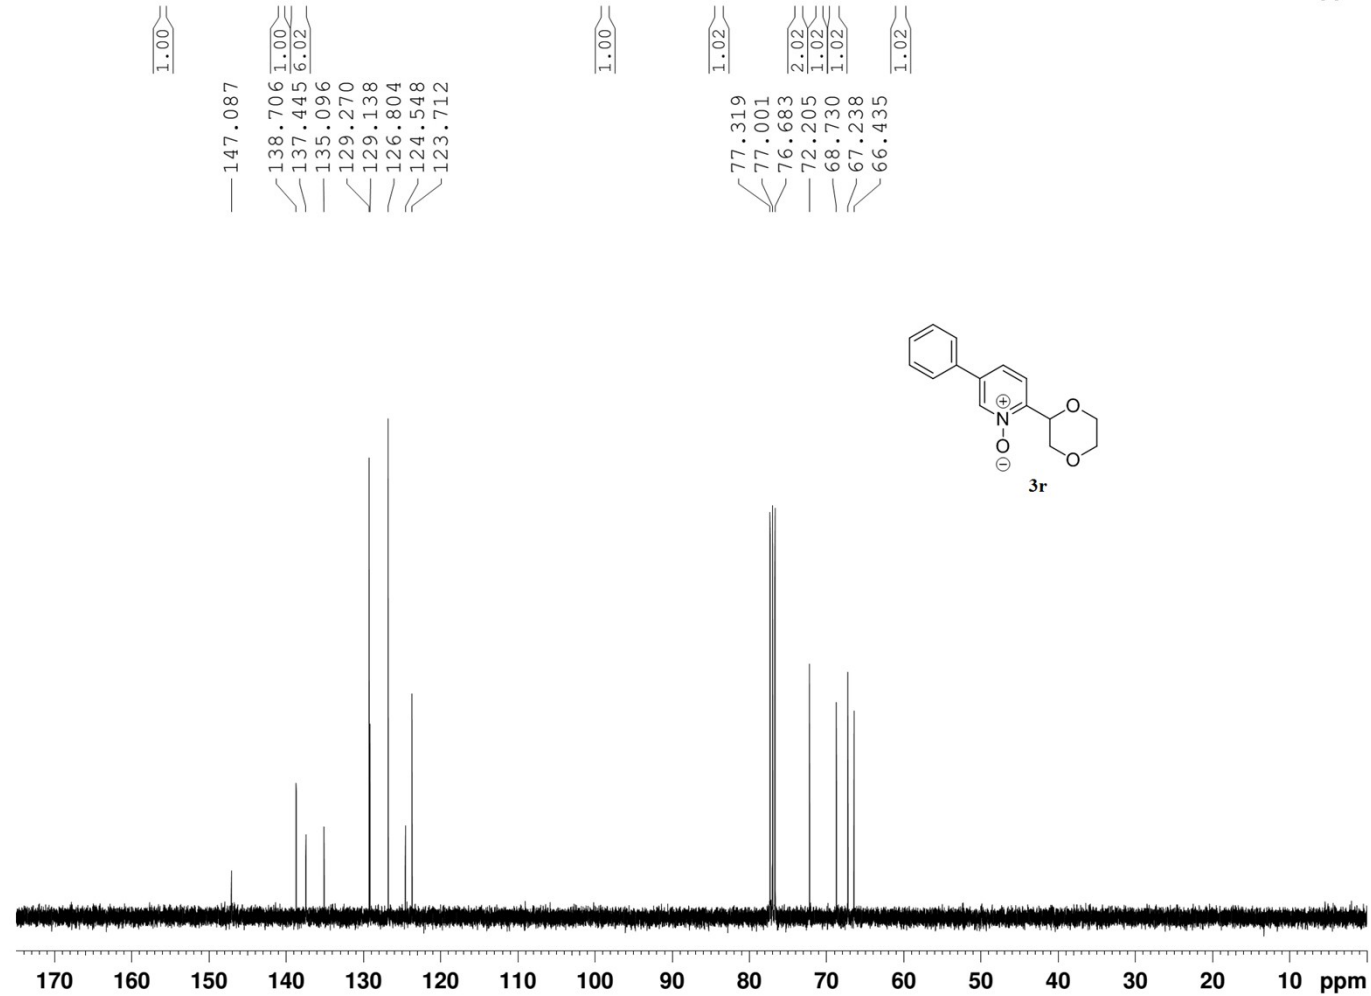

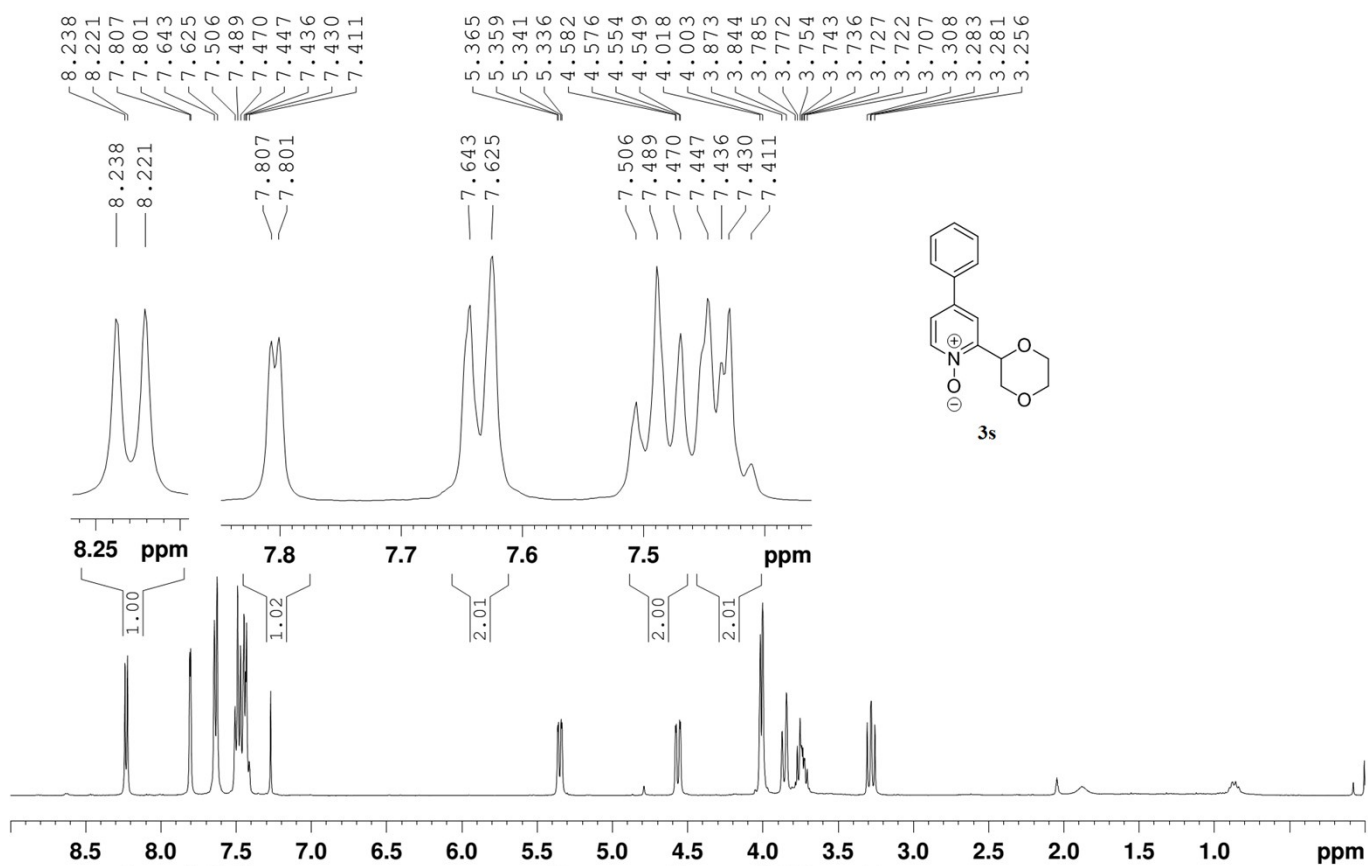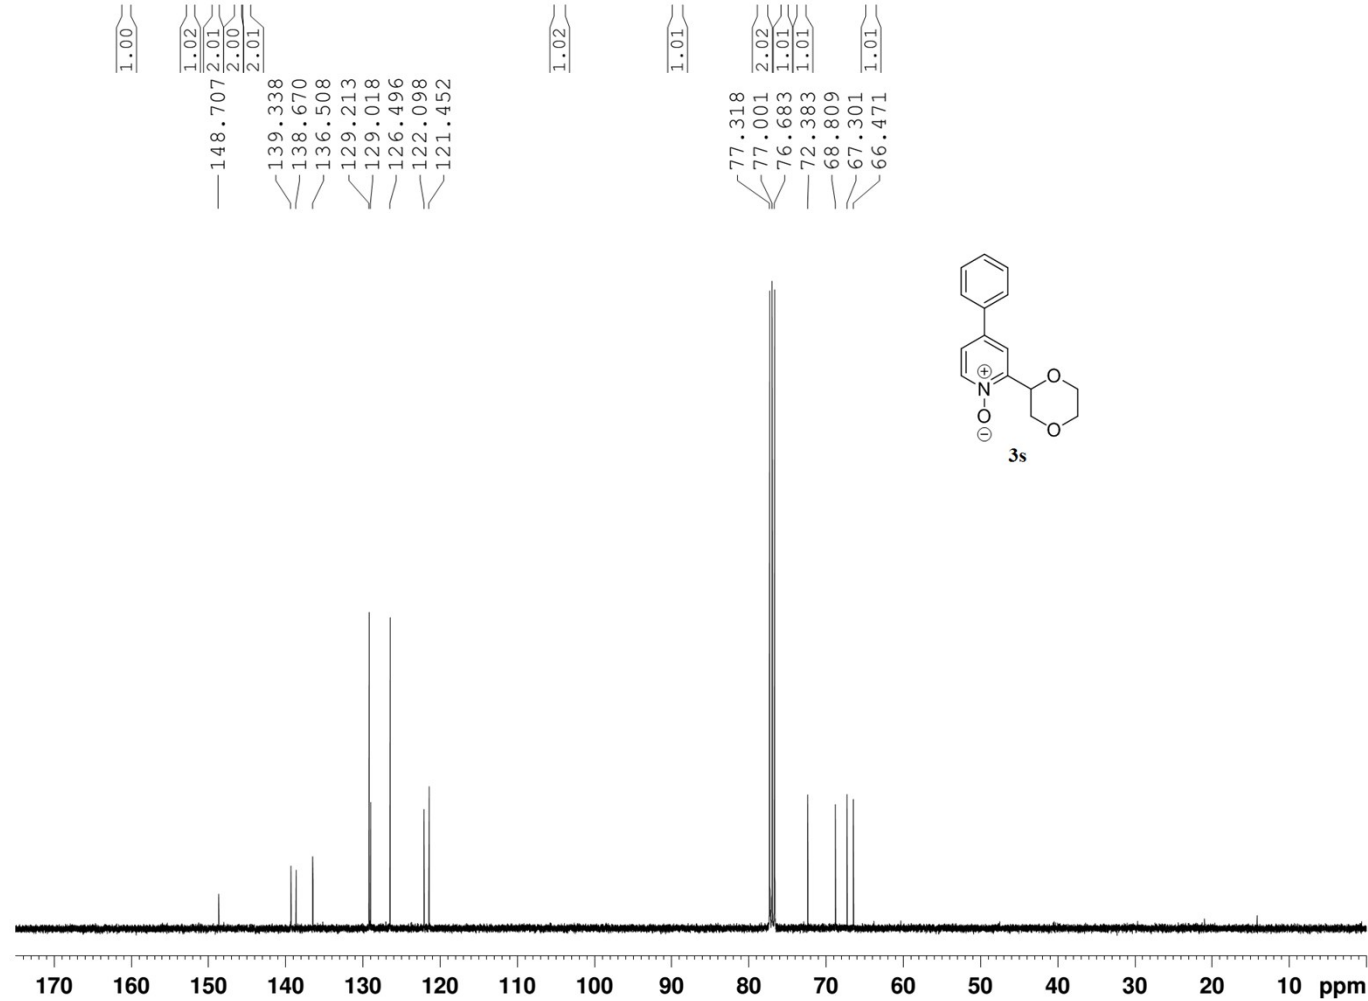



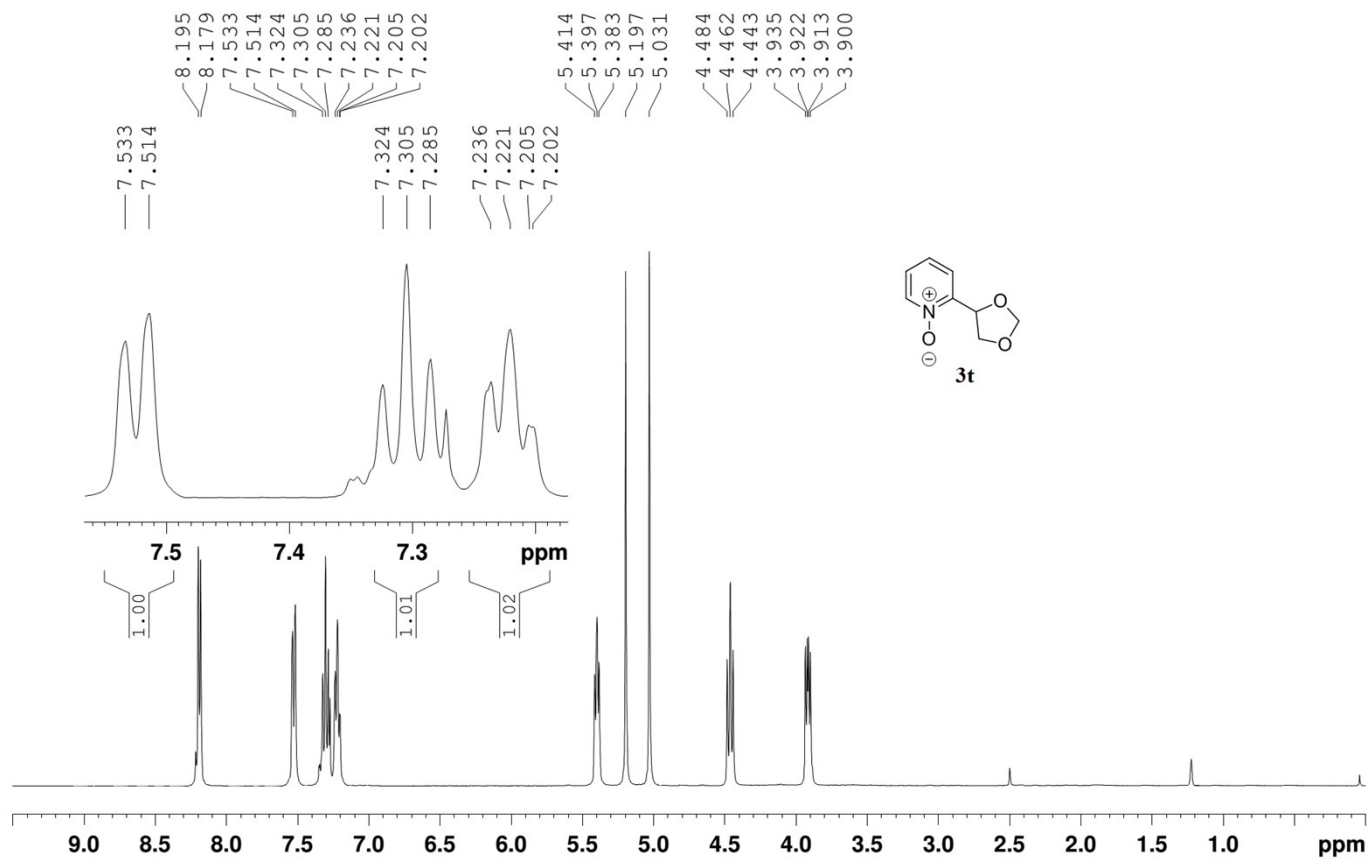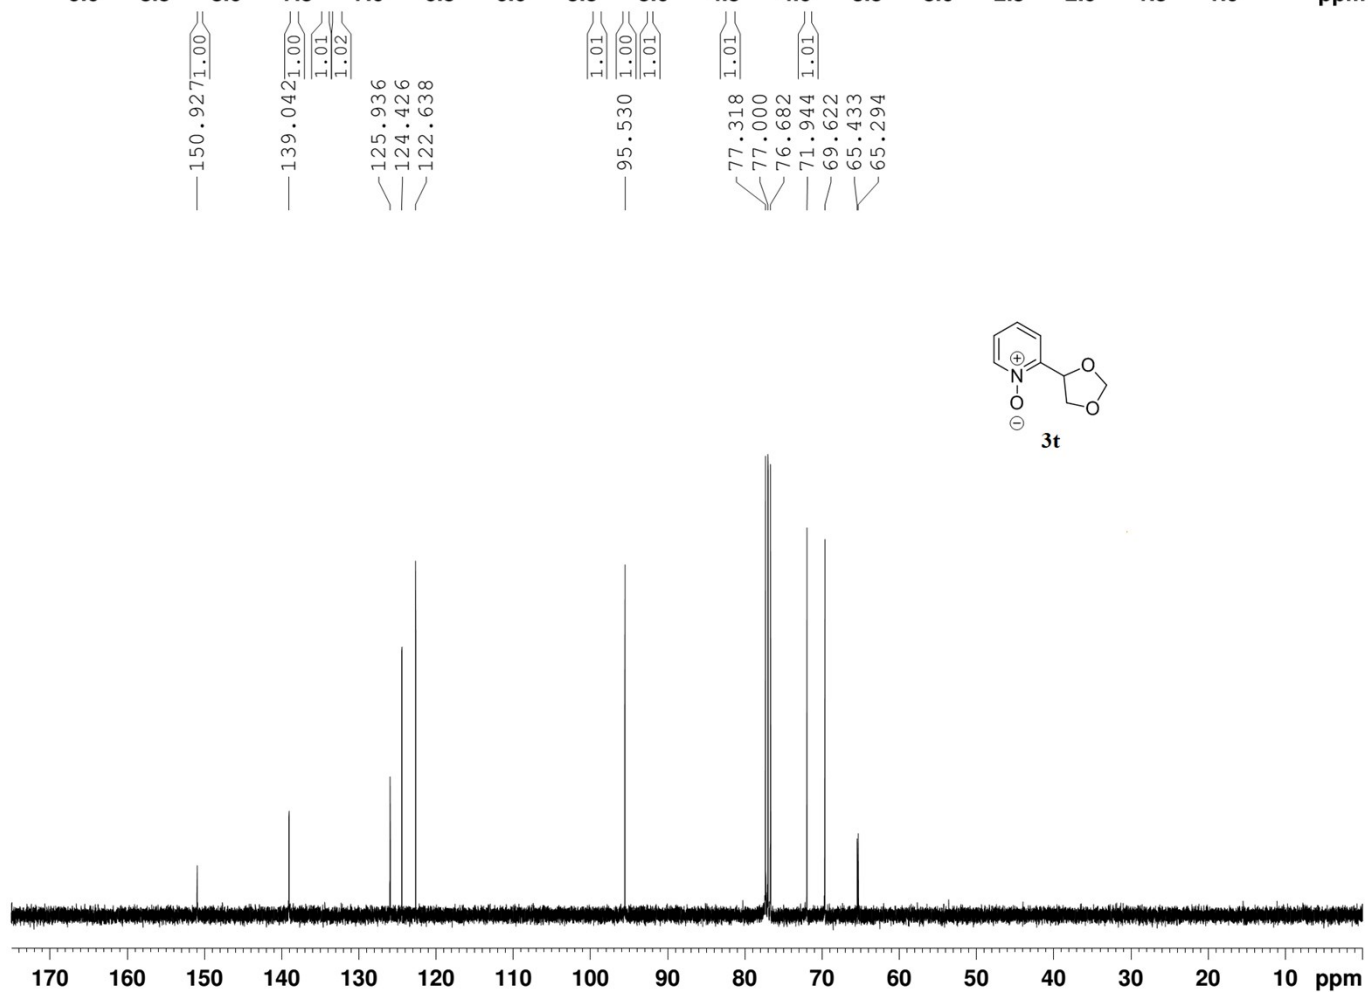

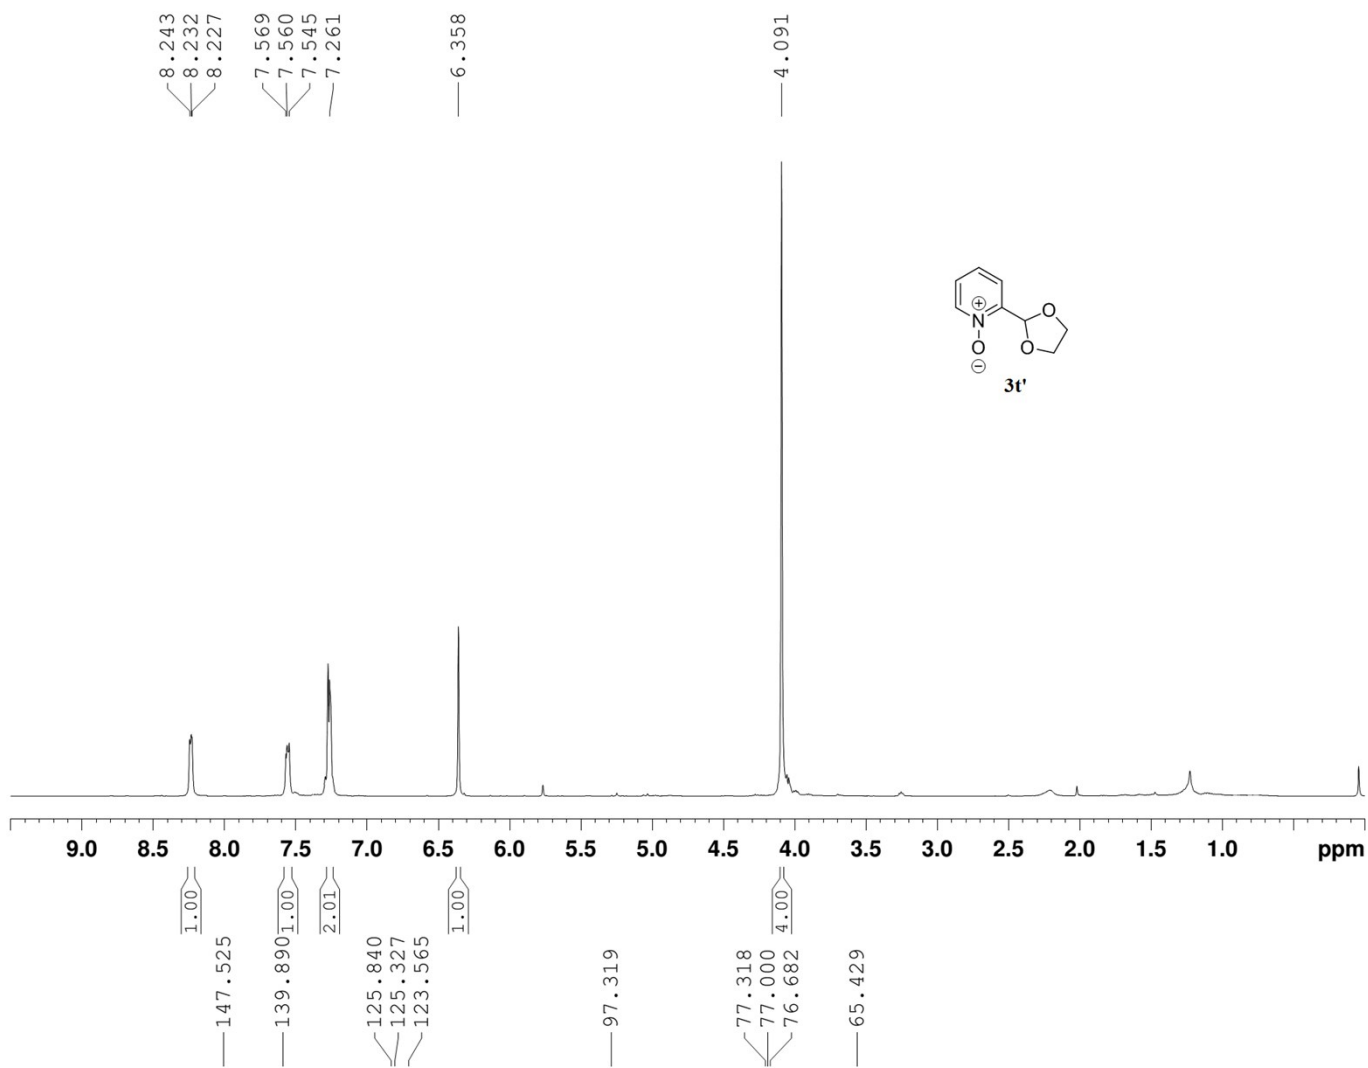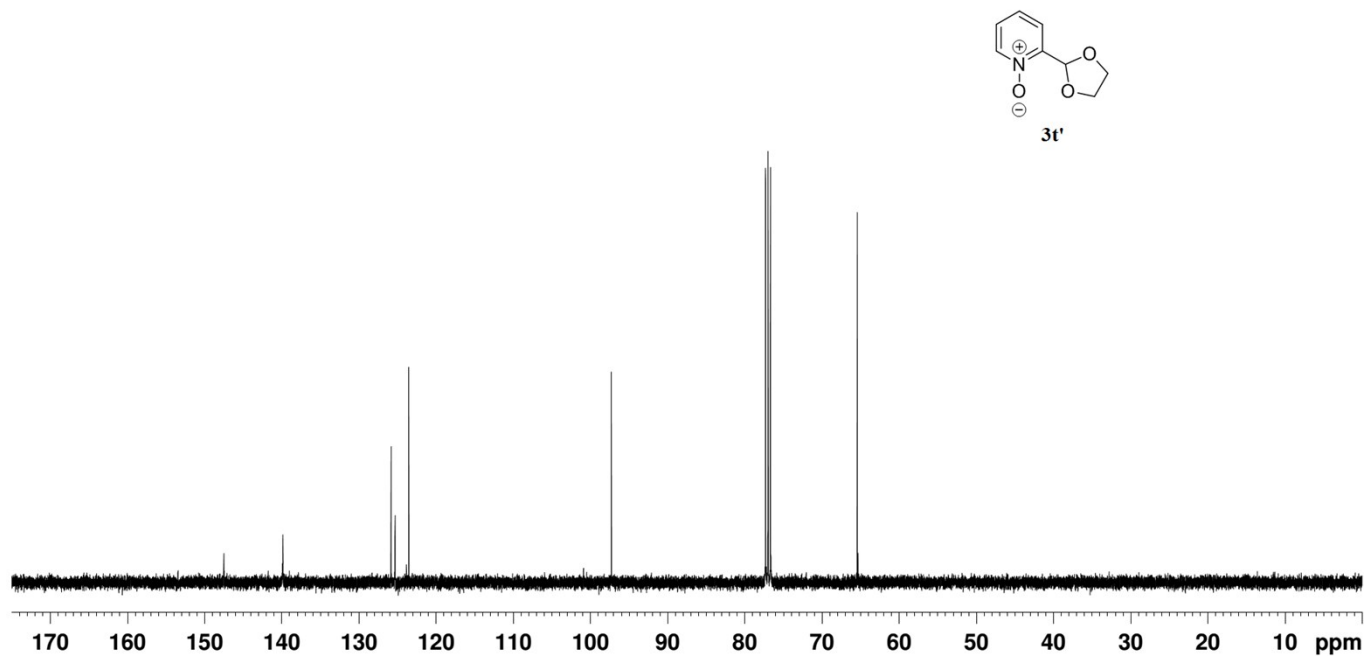

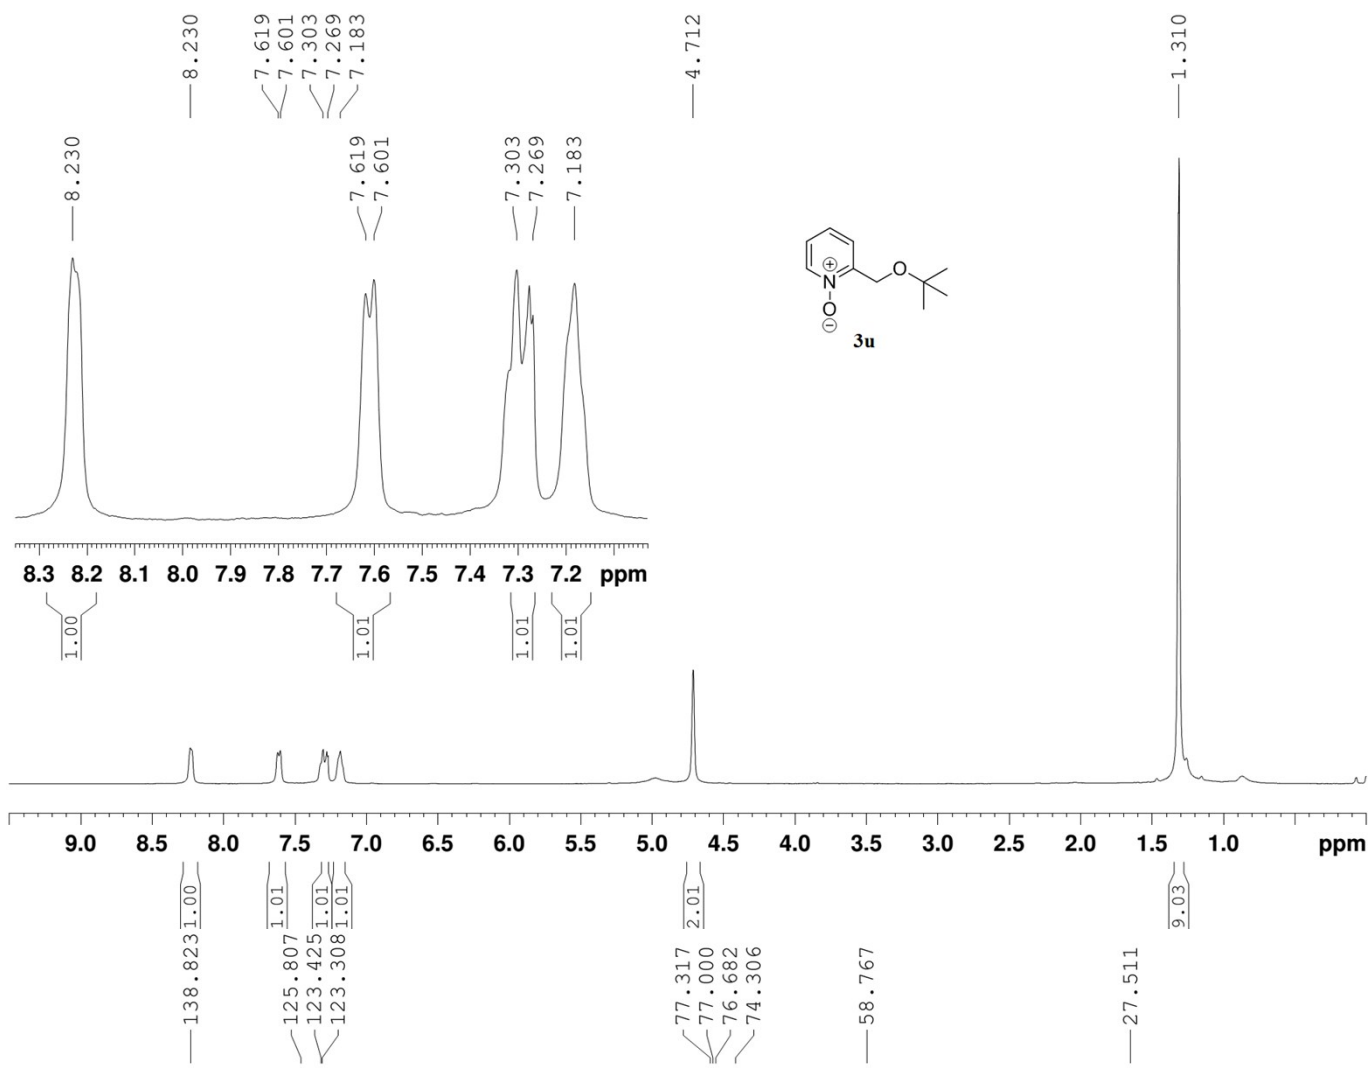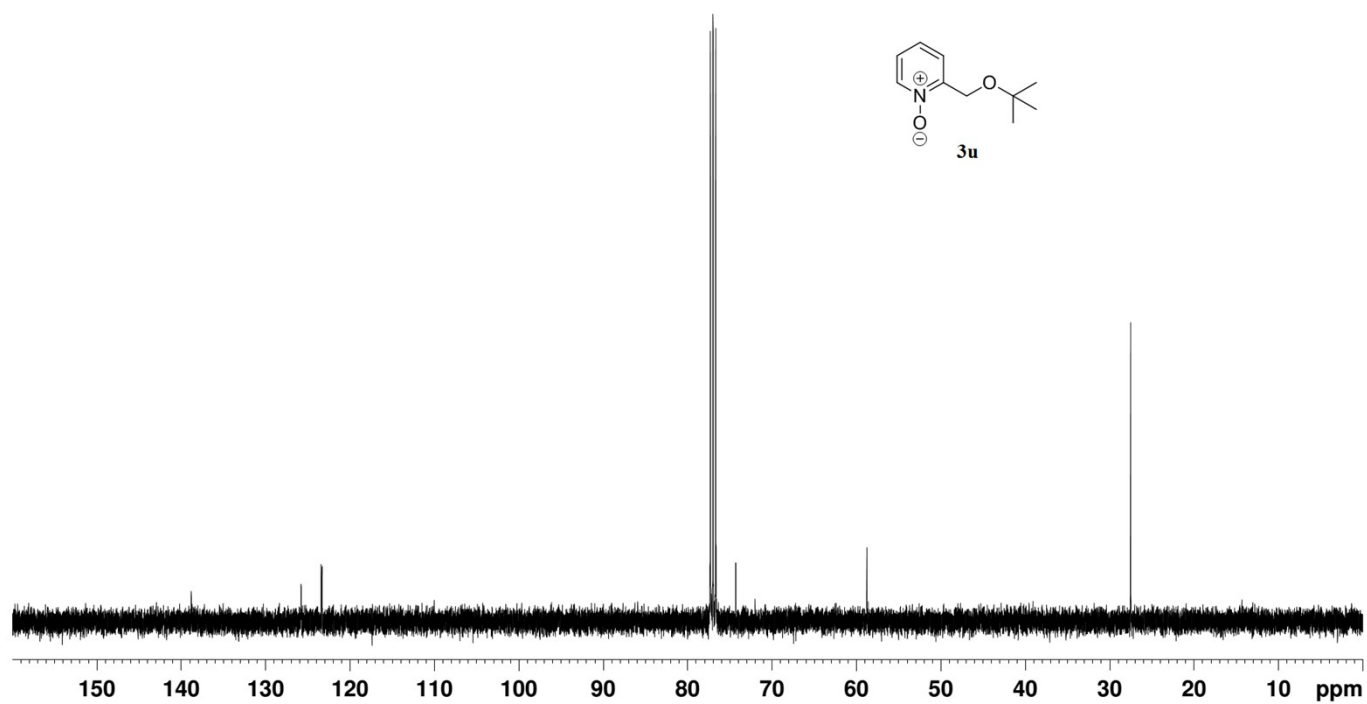

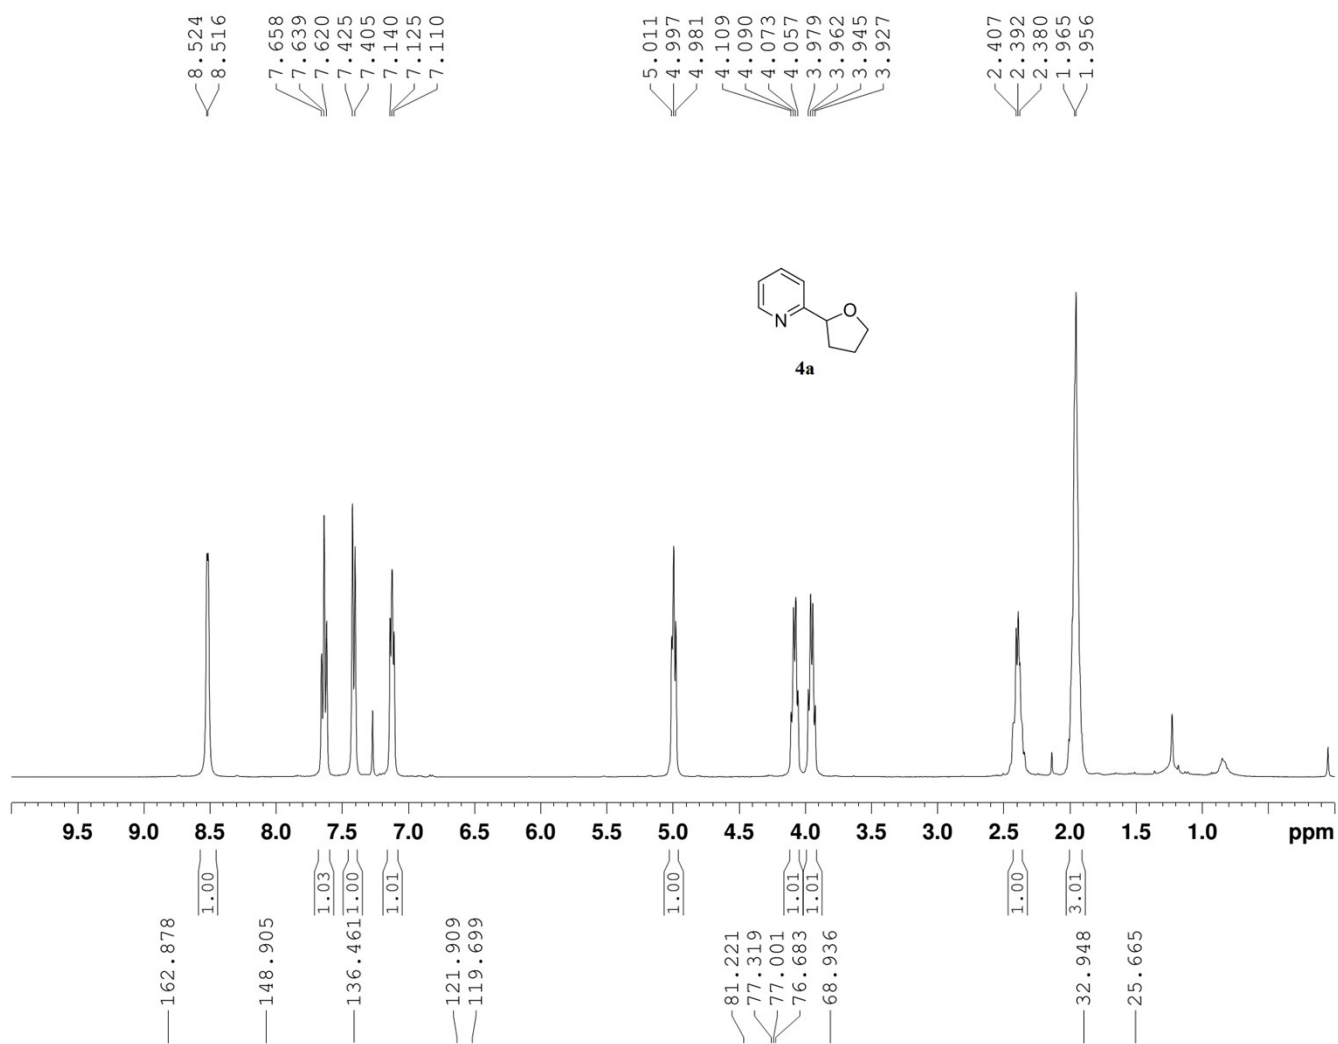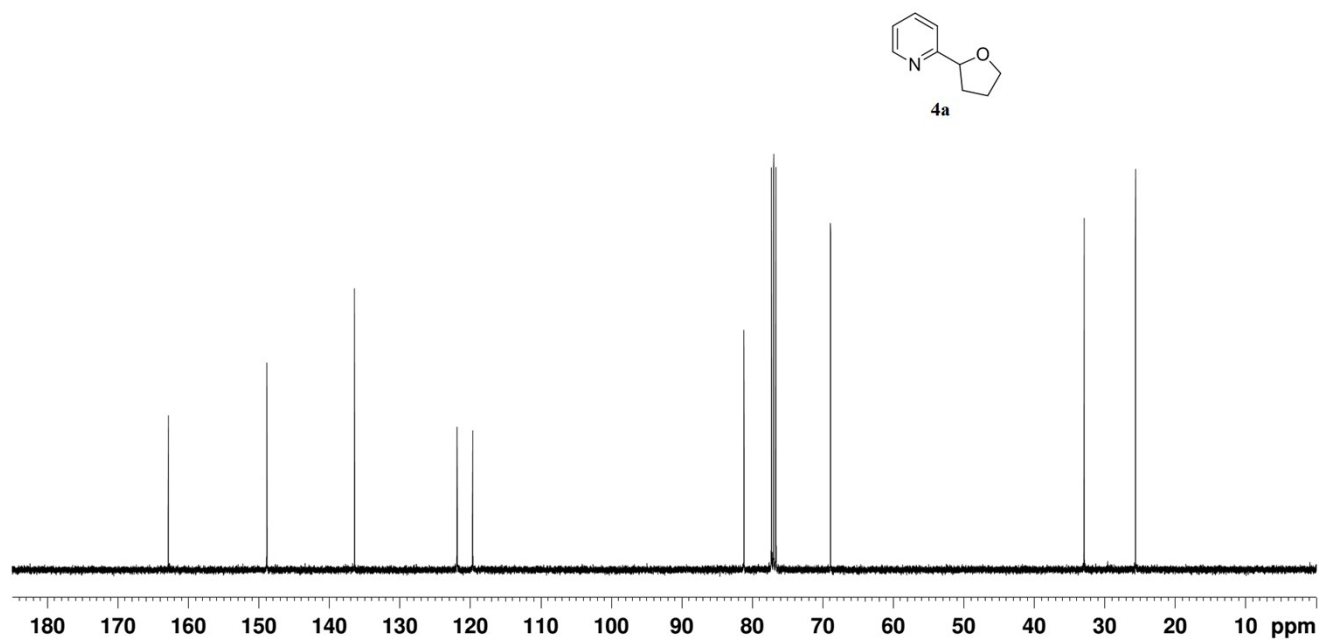

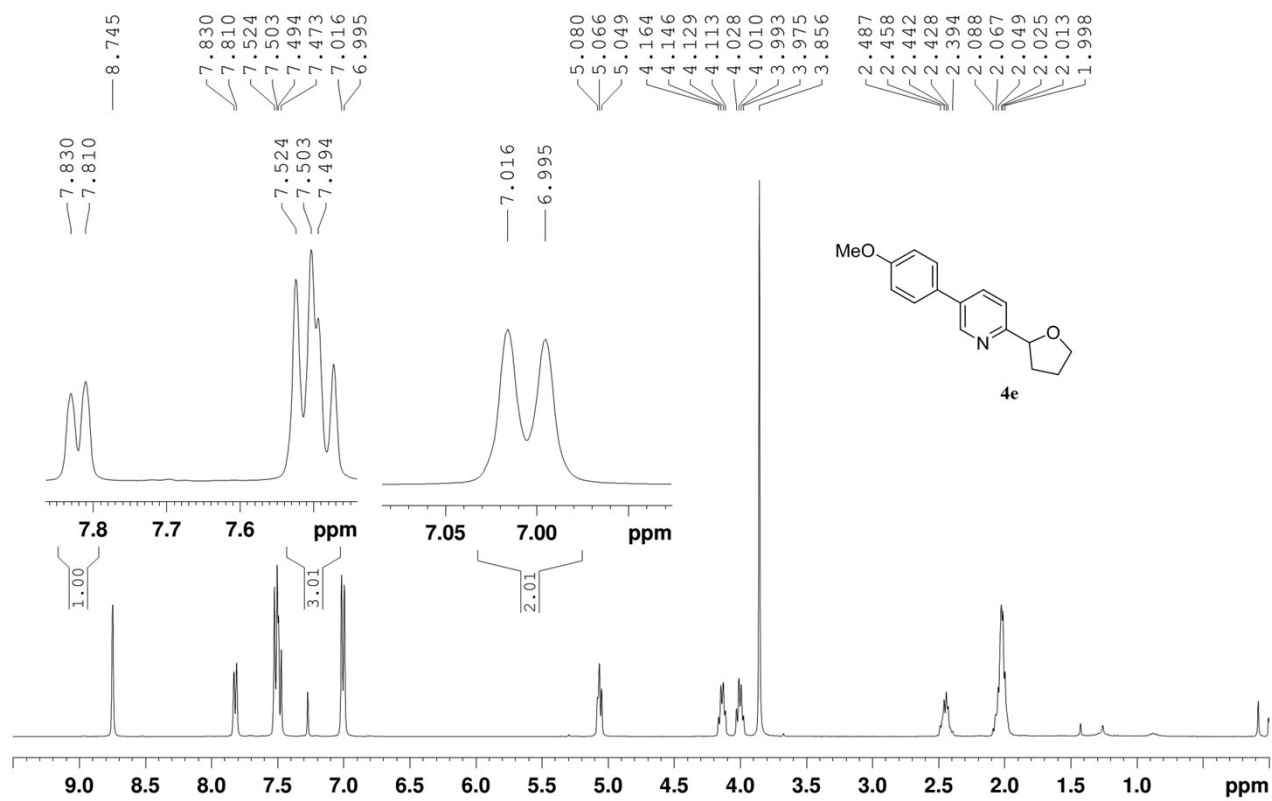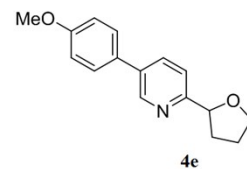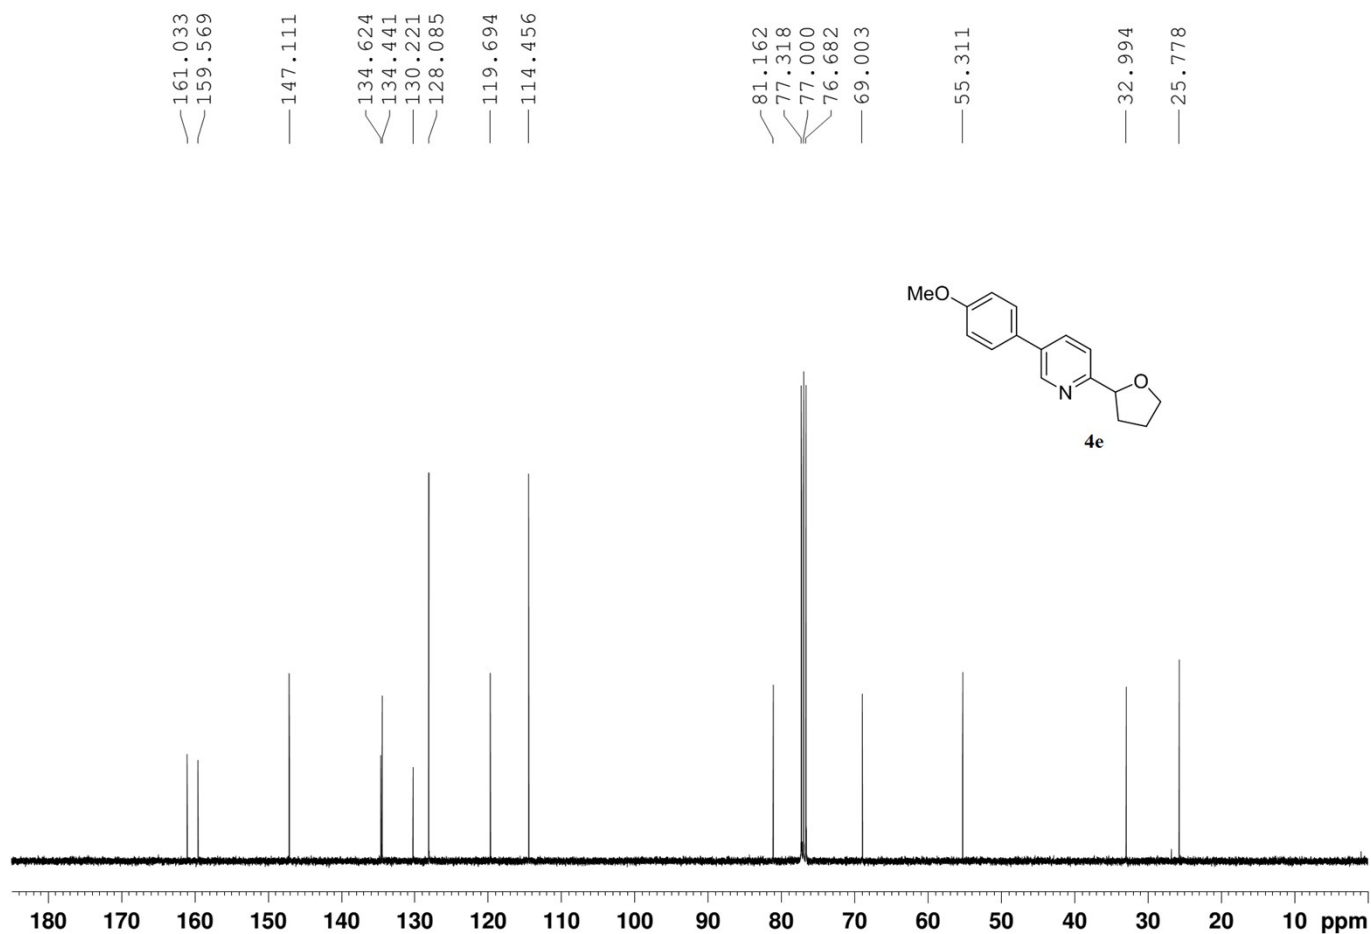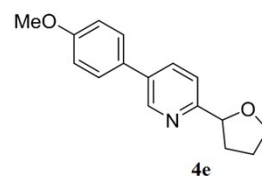

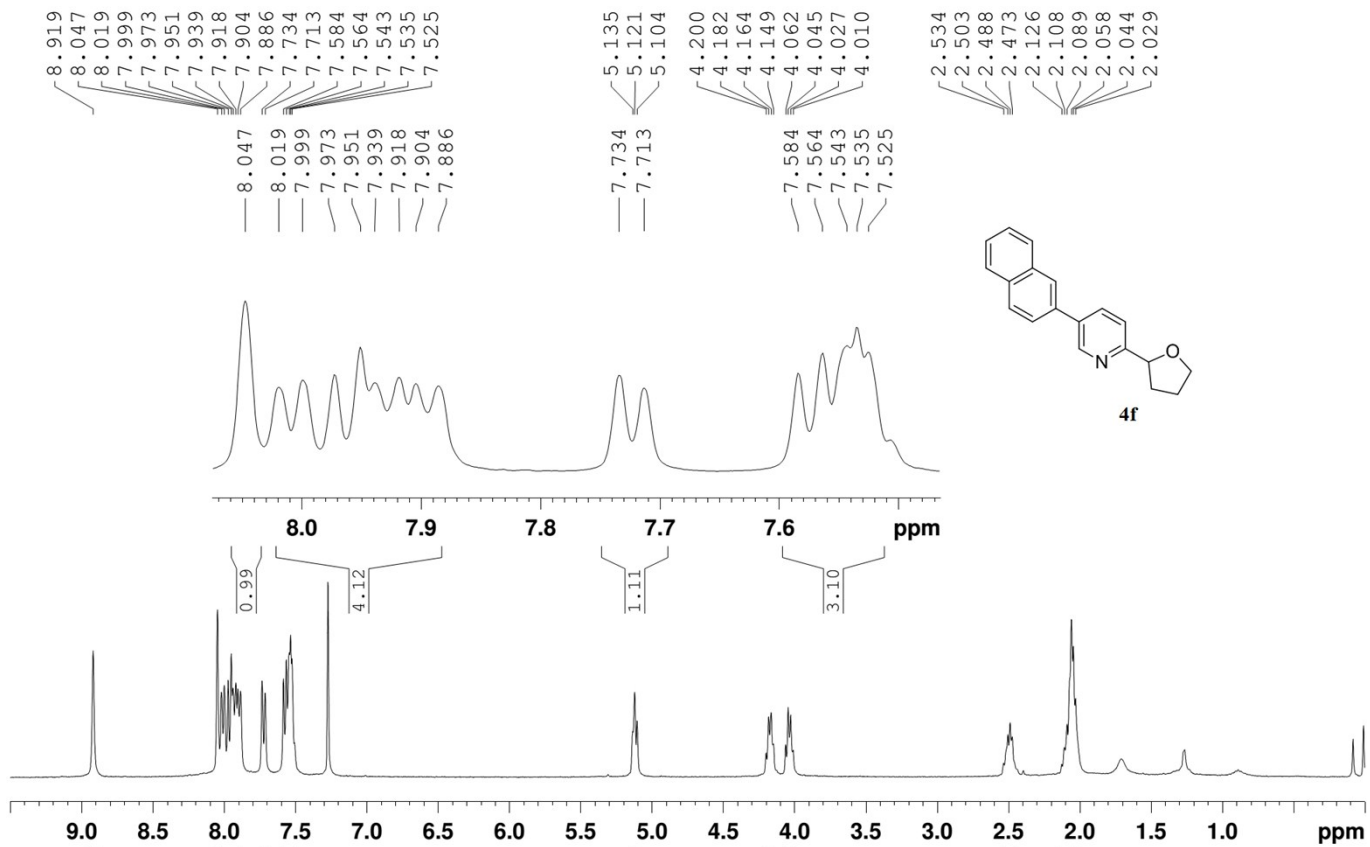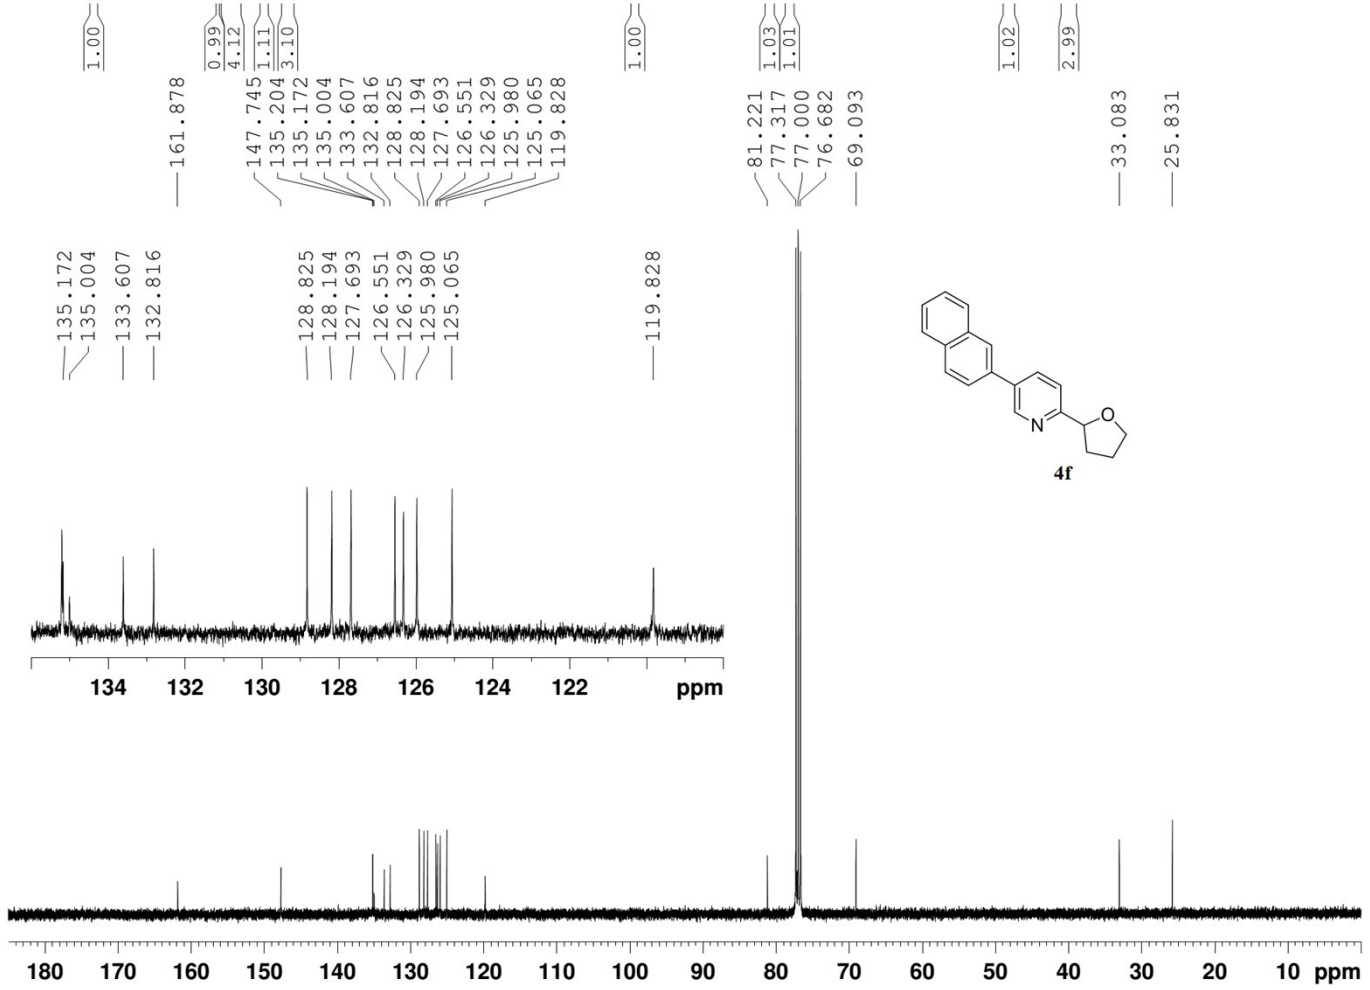

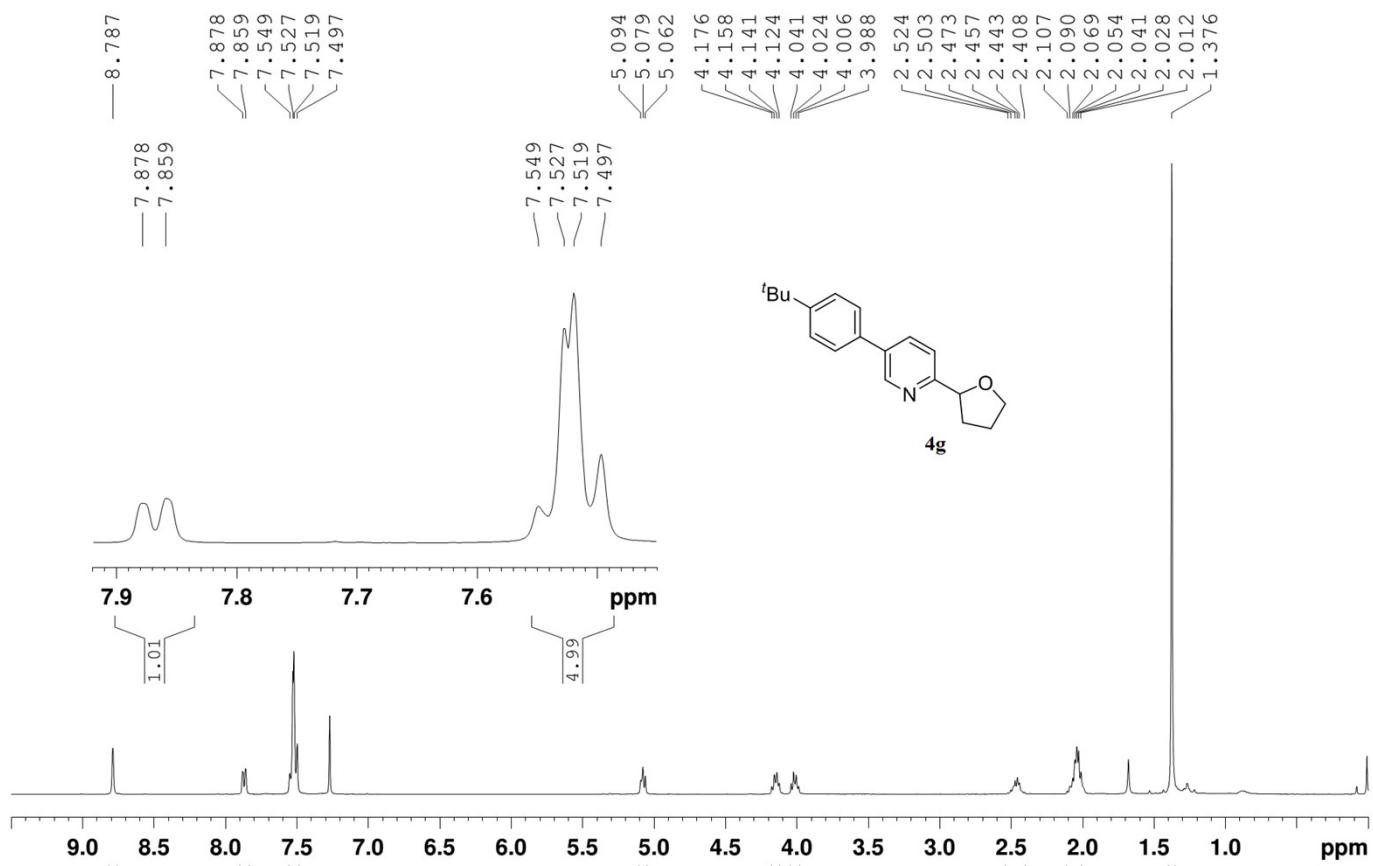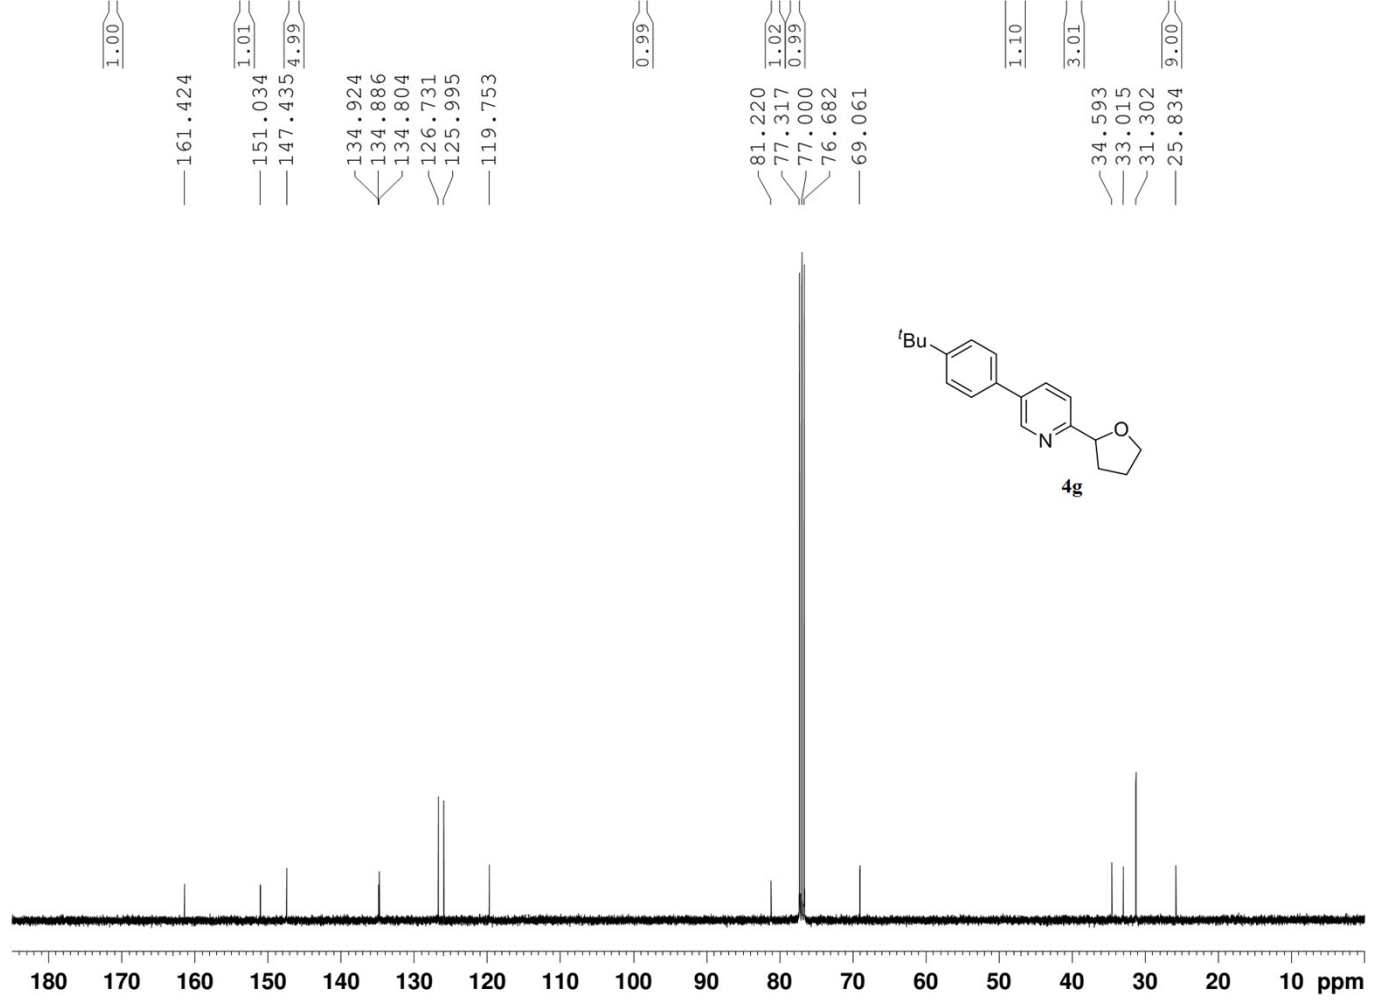

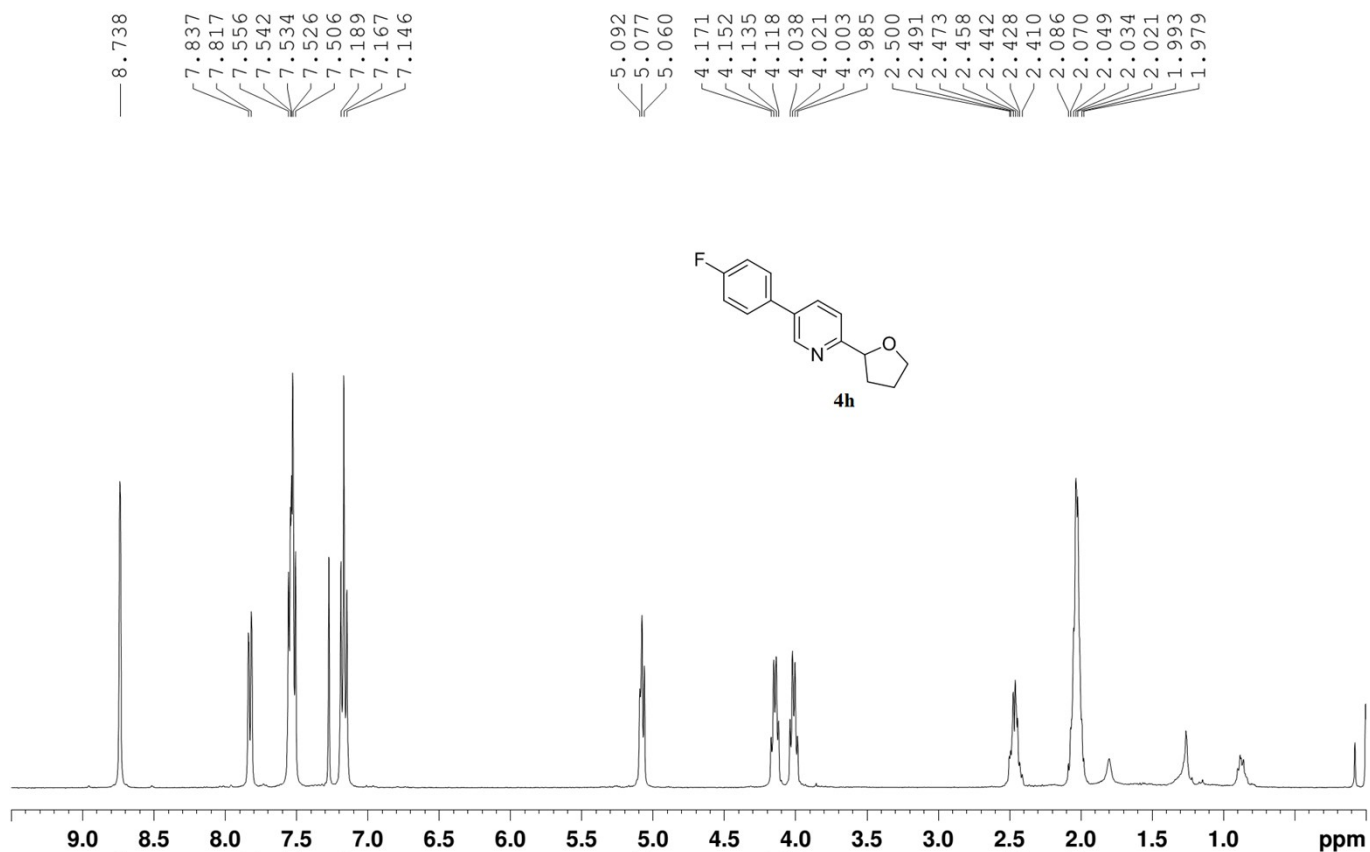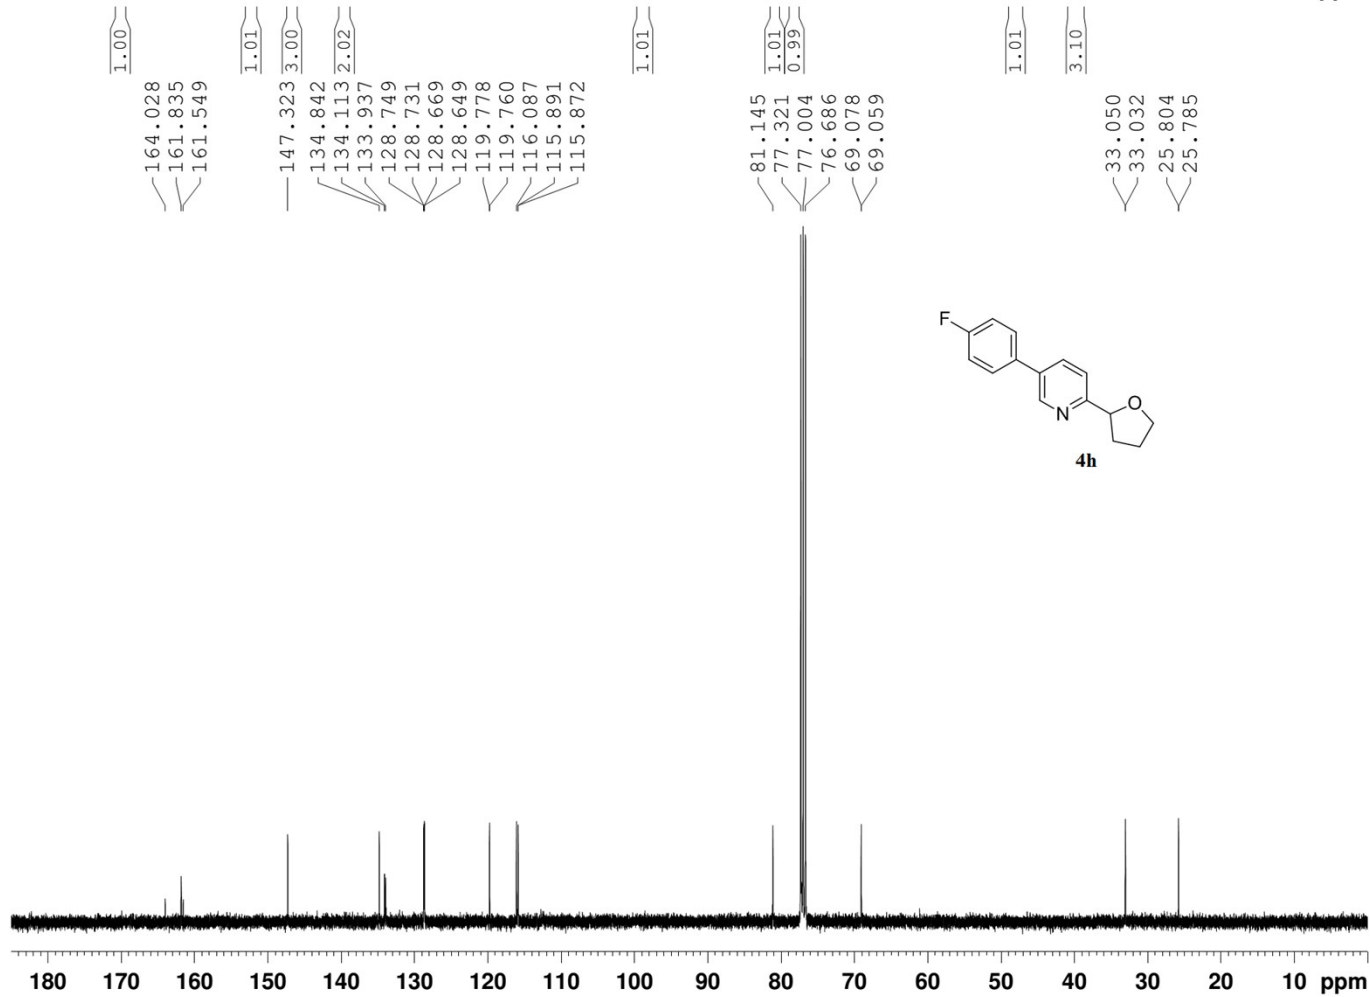



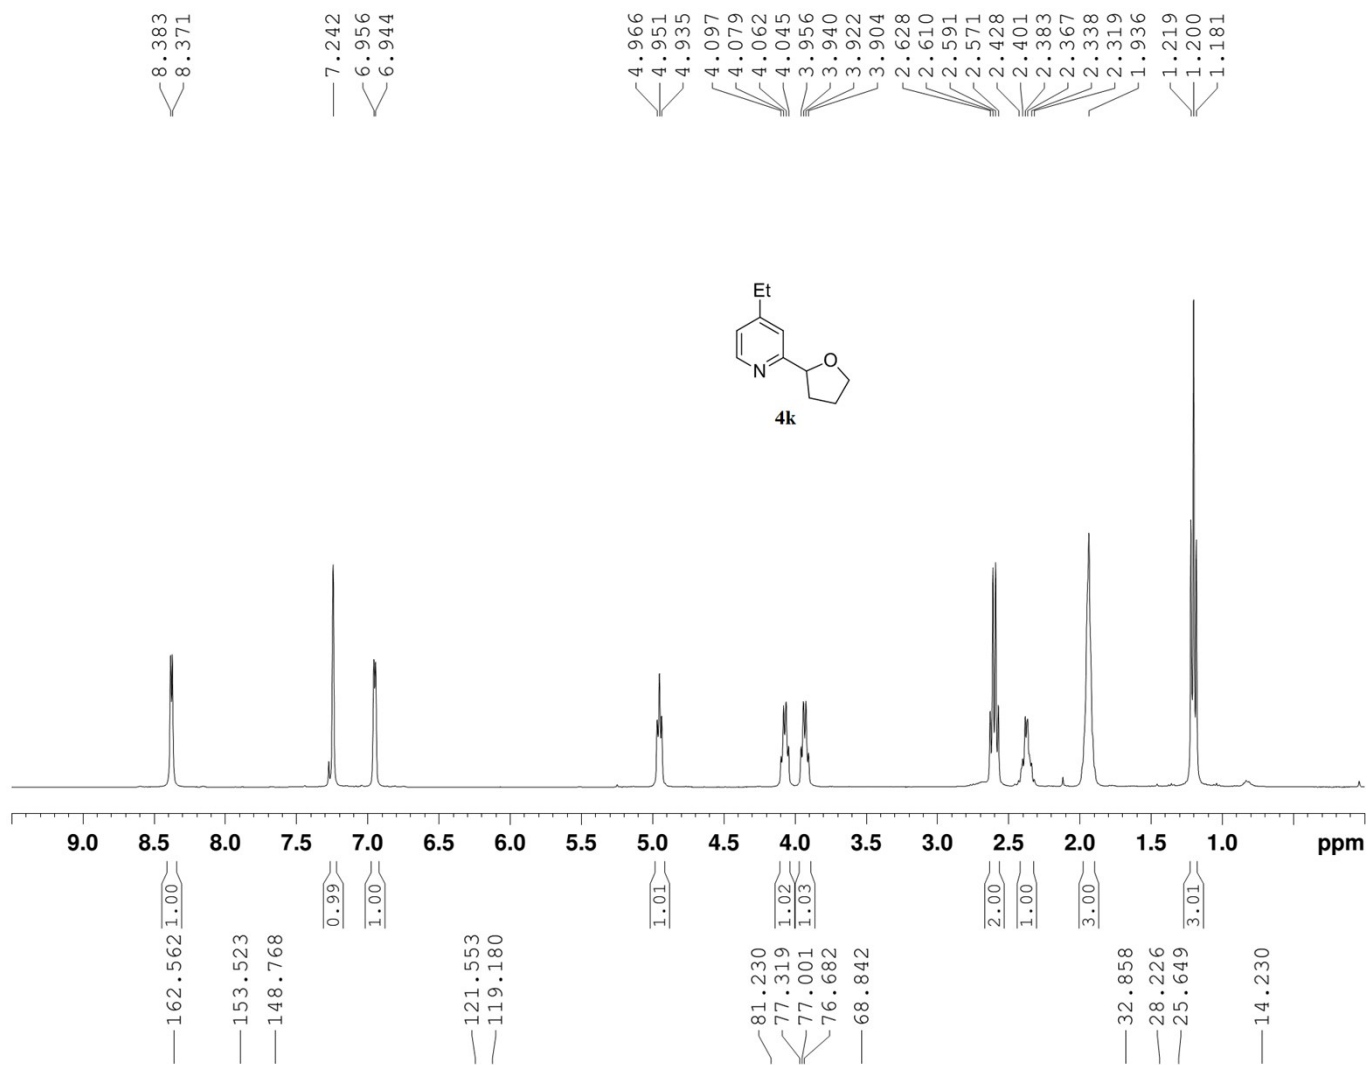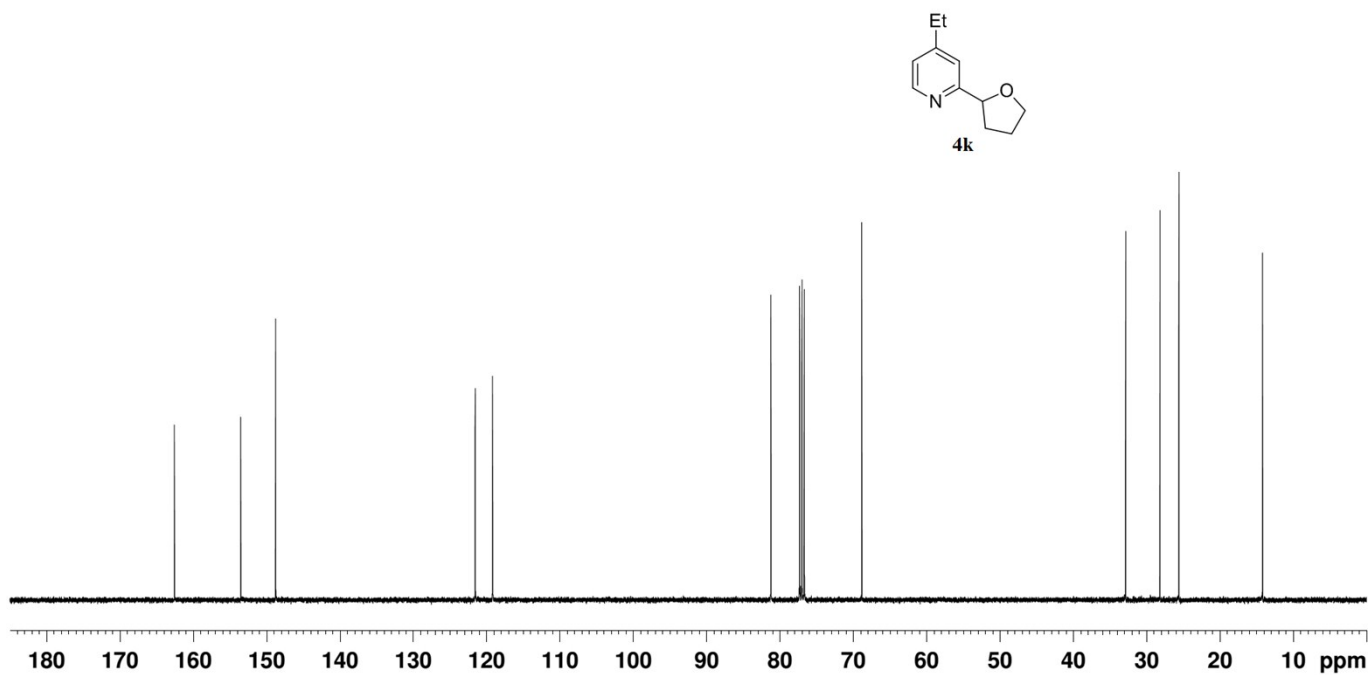

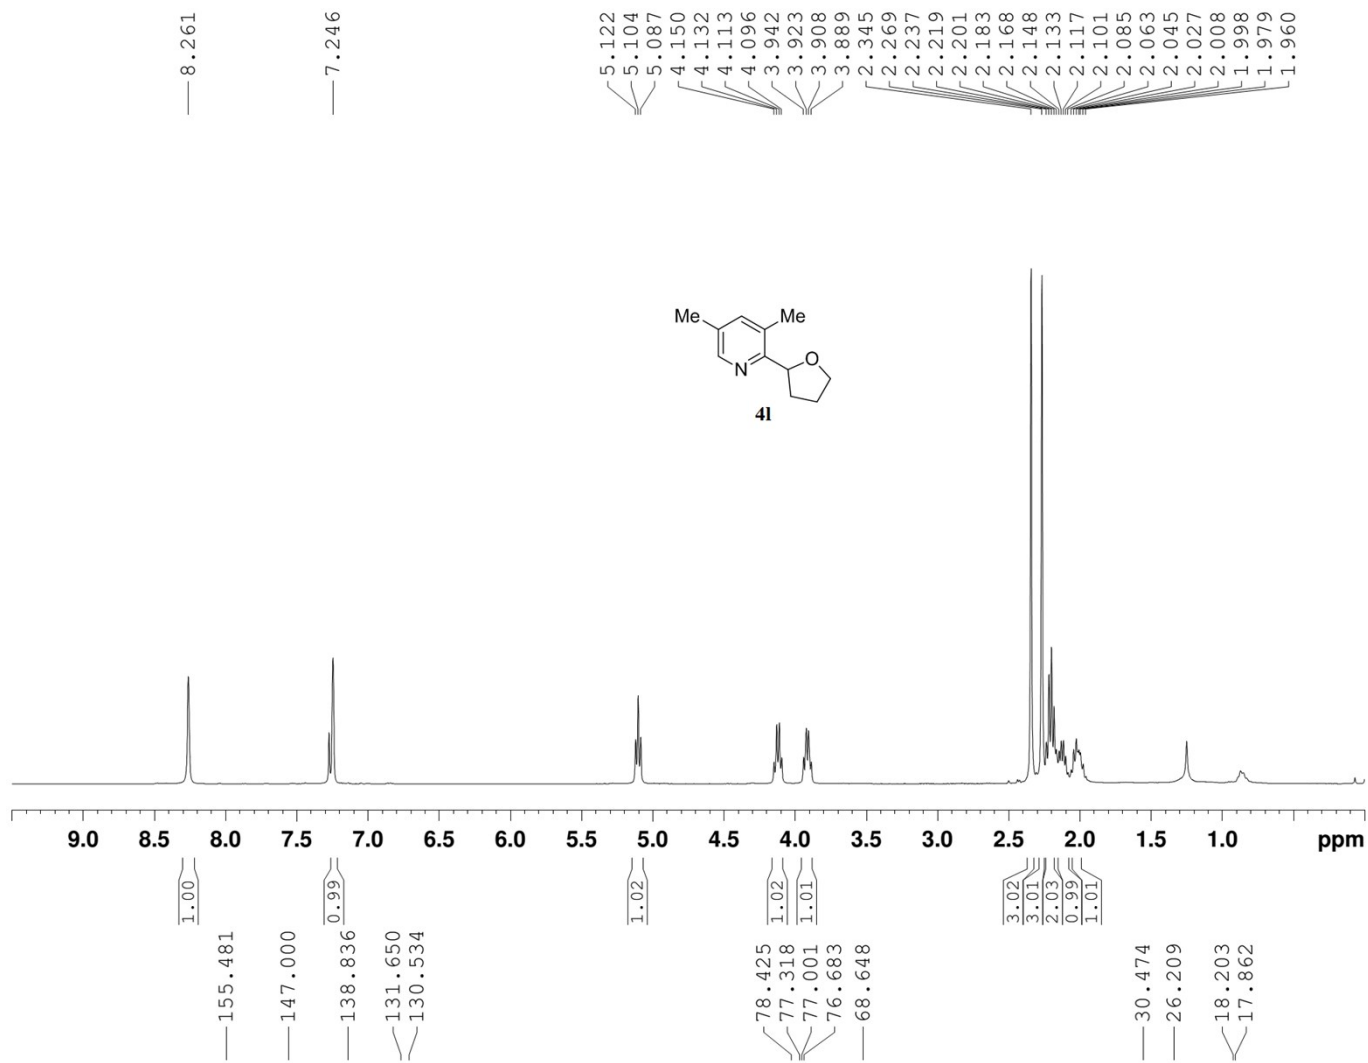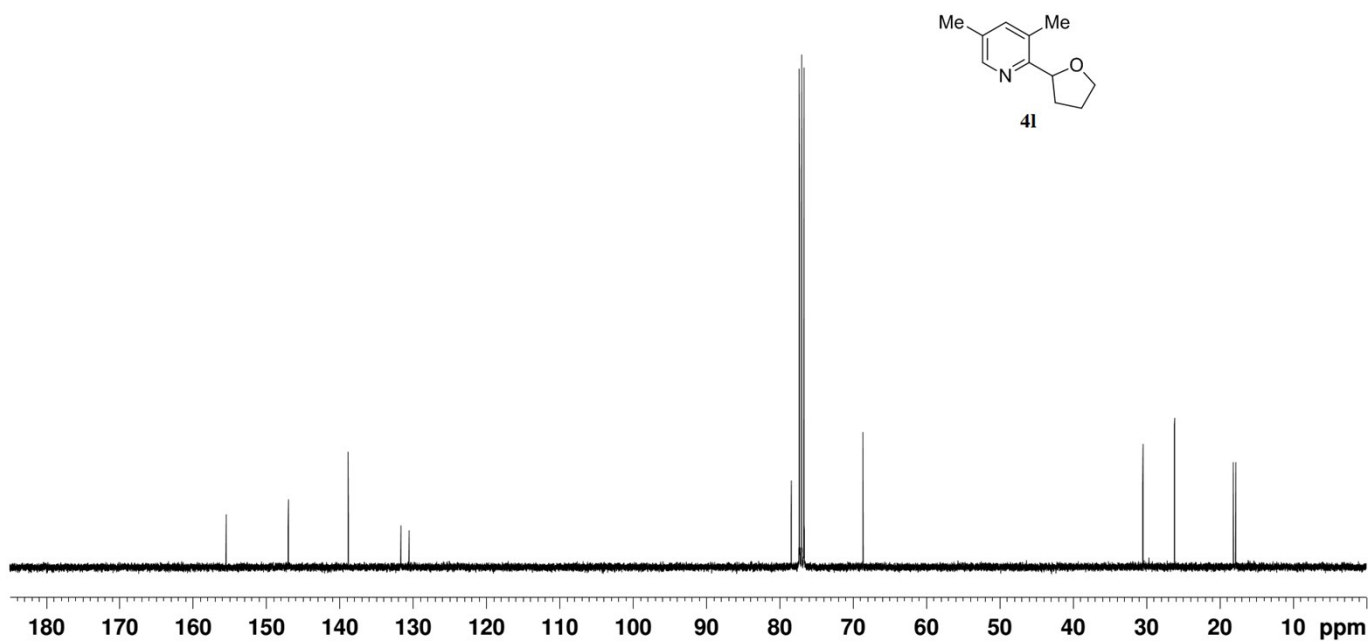

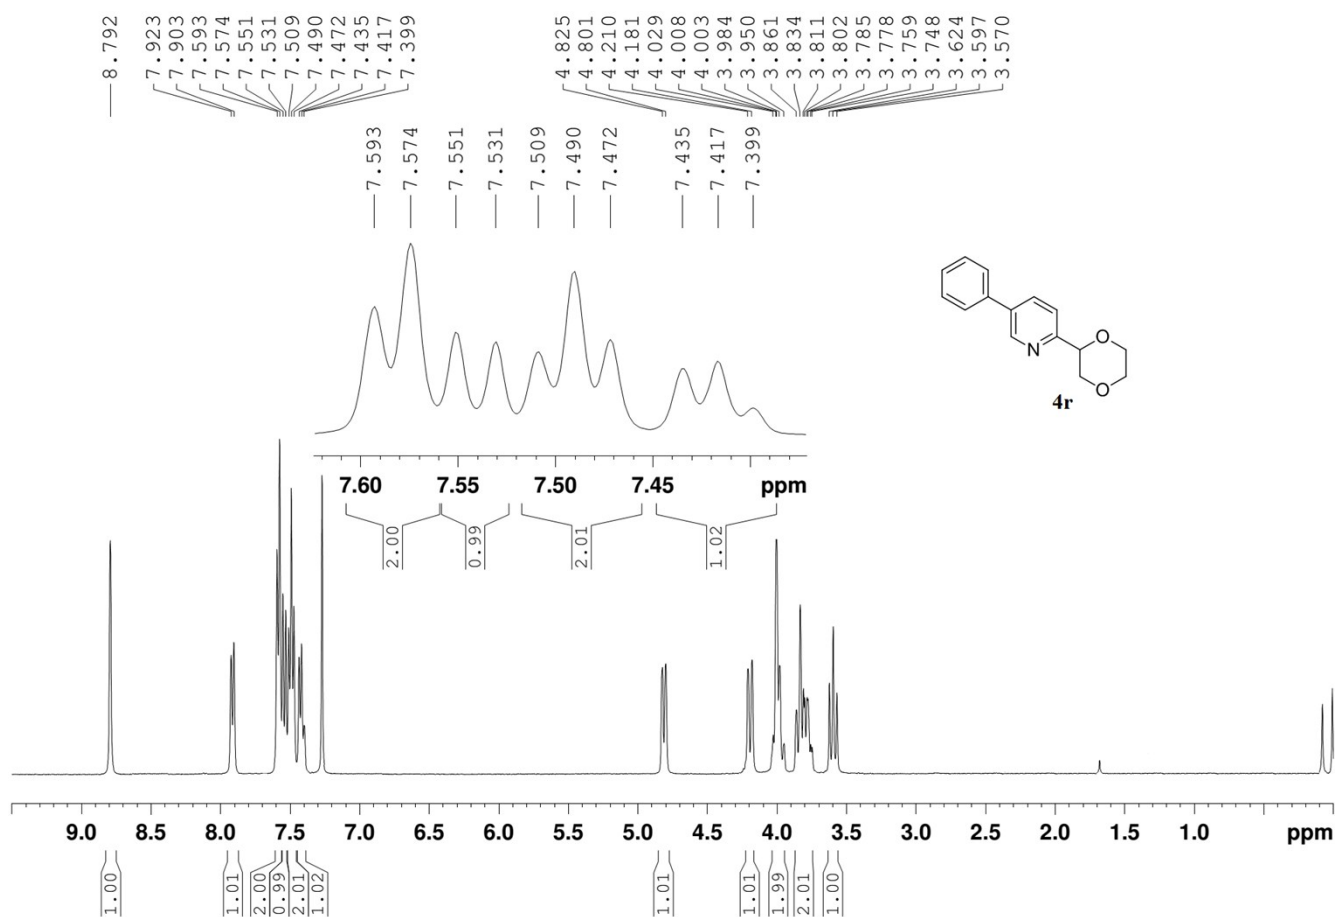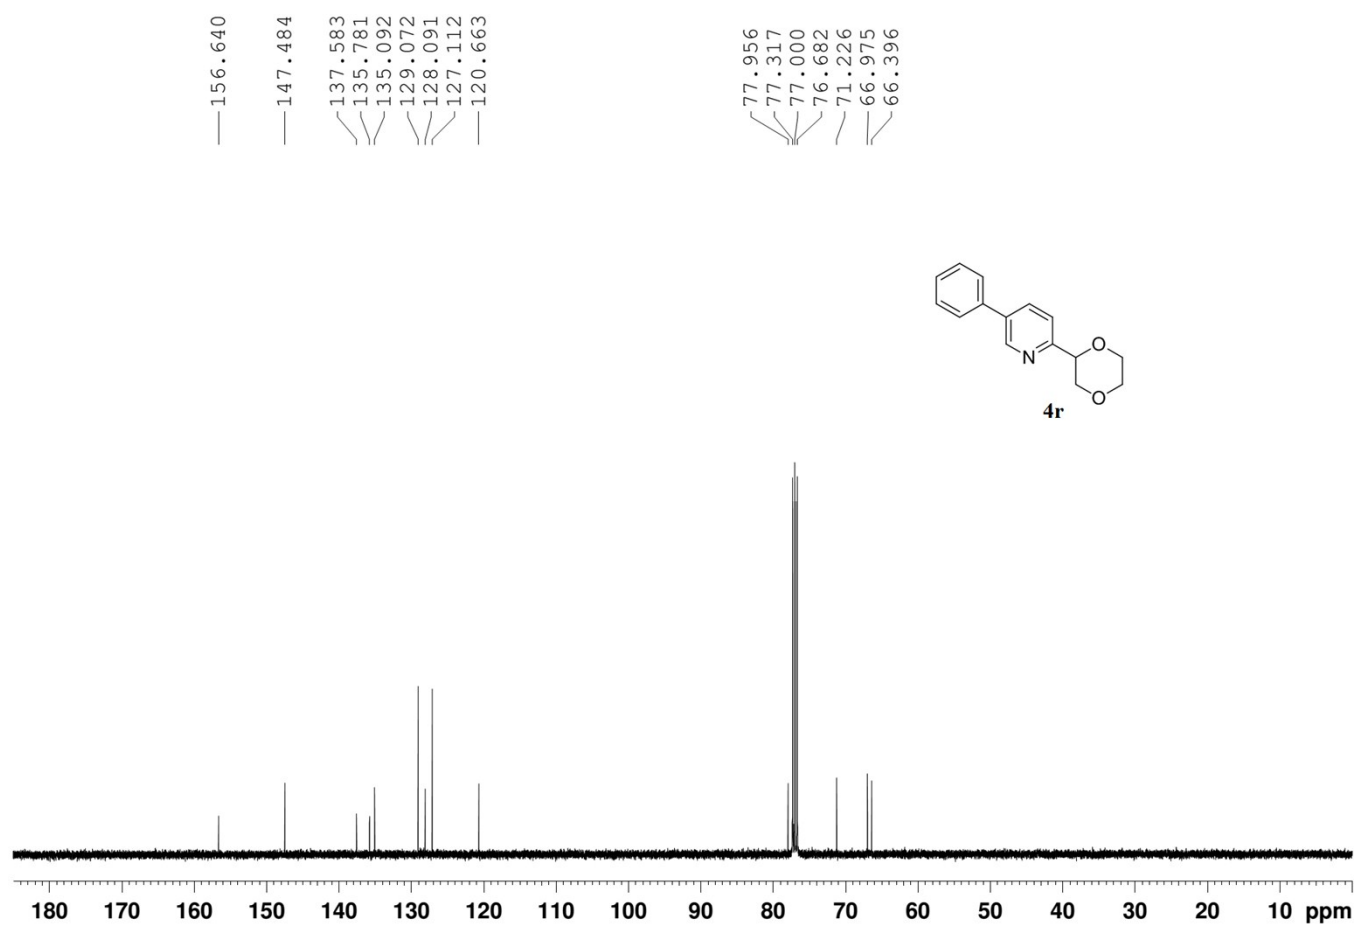

Supplement: c5ob00237k1.pdf [file c5ob00237k1.pdf]
